# Supplementary material for: Catabolic reprogramming of Brassica rapa leaf mesophyll protoplasts during the isolation procedure.
Source: Research Square preprint supplement (doi:10.21203/rs.3.rs-1533265/v1), 2022-04-18
Supplement: Supplementary file 1 [file 0ed6443c5d356cd49acdda25.xlsx]

## Sheet: Gene number of TF family 
	ALL in DB	ALL found in expressed genes
TF family	1726	1079
AP2	18	14
ARF	22	14
ARR-B	14	8
B3	66	25
BBR-BPC	7	5
BES1	8	8
bHLH	153	95
bZIP	74	55
C2H2	100	62
C3H	50	38
CAMTA	6	5
CO-like	17	13
CPP	8	6
DBB	11	9
Dof	36	25
E2F/DP	8	8
EIL	6	3
ERF	123	85
FAR1	17	9
G2-like	42	33
GATA	30	23
GeBP	22	9
GRAS	34	25
GRF	9	6
HB-other	7	7
HB-PHD	2	2
HD-ZIP	48	35
HRT-like	2	1
HSF	24	20
LBD	43	11
LSD	1	3
MIKC_MADS	3	18
M-type_MADS	42	6
MYB	66	79
MYB_related	144	48
NAC	66	68
NF-X1	113	2
NF-YA	2	9
NF-YB	10	10
NF-YC	13	7
Nin-like	14	9
NZZ/SPL	14	1
RAV	1	4
S1Fa-like	6	2
SBP	3	13
SRS	1	4
STAT	17	1
TALE	11	14
TCP	2	19
Trihelix	21	25
VOZ	24	2
Whirly	29	3
WOX	2	4
WRKY	3	54
YABBY	16	4
ZF-HD	72	11

## Sheet: Expression data of TF family
	Number of genes							p-value (Hypergeometric distribution)
	Up	Up	Up	Down	Down	Down		Up	Up	Up	Down	Down	Down
TF family	Leaf3h vs Leaf0h	Proto vs Leaf0h	Proto vs Leaf3h	Leaf3h vs Leaf0h	Proto vs Leaf0h	Proto vs Leaf3h		Leaf3h vs Leaf0h	Proto vs Leaf0h	Proto vs Leaf3h	Leaf3h vs Leaf0h	Proto vs Leaf0h	Proto vs Leaf3h
AP2	4	2	2	5	0	5		0.368249	0.716822	0.323398	0.245698	1	0.00387014
ARF	1	8	1	5	2	1		0.968617	0.000798585	0.700632	0.245698	0.835815	0.696986
ARR-B	0	3	0	4	0	0		1	0.141976	1	0.107811	1	1
B3	6	5	2	5	0	3		0.476566	0.426502	0.622904	0.771765	1	0.335271
BBR-BPC	0	0	0	0	0	0		1	1	1	1	1	1
BES1	2	1	2	2	0	1		0.55101	0.775825	0.136591	0.622008	1	0.494467
bHLH	15	33	10	40	2	18		0.946198	2.29088e-05	0.256813	0.000125142	1	0.000610319
bZIP	10	10	10	7	8	1		0.794167	0.466323	0.013503	0.990439	0.926958	0.990875
C2H2	17	22	13	22	6	9		0.182534	0.000360389	0.00140843	0.0355298	0.995672	0.0636998
C3H	6	9	3	5	2	0		0.868589	0.187673	0.617184	0.973183	0.998829	1
CAMTA	0	0	0	0	0	0		1	1	1	1	1	1
CO-like	0	7	0	8	1	0		1	0.00273088	1	0.00501145	0.95668	1
CPP	1	1	0	2	0	1		0.773064	0.674184	1	0.455697	1	0.400449
DBB	0	3	0	2	1	0		1	0.187163	1	0.689128	0.886159	1
Dof	6	2	3	9	2	7		0.476566	0.942719	0.340879	0.137283	0.981322	0.00309804
E2F/DP	2	1	1	1	0	0		0.55101	0.775825	0.497951	0.89519	1	1
EIL	1	0	1	1	0	0		0.523585	1	0.227679	0.570744	1	1
ERF	27	26	21	24	10	16		0.0222682	0.00147703	3.86242e-06	0.250216	0.993039	0.00129054
FAR1	2	1	0	0	0	0		0.619033	0.814055	1	1	1	1
G2-like	4	4	3	15	2	7		0.950781	0.837881	0.519699	0.00705607	0.996547	0.0155264
GATA	2	5	0	10	0	4		0.974753	0.353466	1	0.0363315	1	0.113347
GeBP	3	0	0	0	0	1		0.312931	1	1	1	1	0.535797
GRAS	0	11	2	12	1	2		1	0.00147983	0.622904	0.00923034	0.997617	0.617455
GRF	0	1	0	3	0	0		1	0.674184	1	0.162554	1	1
HB-other	0	1	0	0	1	0		1	0.72974	1	1	0.815473	1
HB-PHD	0	0	0	0	0	0		1	1	1	1	1	1
HD-ZIP	6	8	3	17	1	10		0.809794	0.236884	0.560324	0.00175995	0.999788	0.000353422
HRT-like	0	0	0	0	0	0		1	1	1	1	1	1
HSF	9	6	4	4	0	1		0.0179776	0.110742	0.0772186	0.761492	1	0.81841
LBD	5	2	6	2	1	1		0.0709441	0.582715	0.000100264	0.79383	0.929773	0.608603
LSD	0	2	0	1	1	0		1	0.0772386	1	0.570744	0.515273	1
MIKC_MADS	4	4	3	4	1	2		0.578401	0.368866	0.181497	0.679353	0.987058	0.439214
M-type_MADS	2	2	0	1	0	0		0.391177	0.272357	1	0.815773	1	1
MYB	26	14	15	21	5	12		0.0155351	0.482748	0.00181494	0.379506	0.999948	0.0261744
MYB_related	10	14	9	14	8	6		0.626786	0.0259066	0.0153647	0.276738	0.837444	0.19532
NAC	20	7	19	10	1	12		0.0907298	0.957746	1.52123e-06	0.983505	1	0.00846783
NF-X1	0	0	0	0	0	0		1	1	1	1	1	1
NF-YA	0	5	1	4	2	0		1	0.0098495	0.539395	0.157609	0.606284	1
NF-YB	4	2	4	2	1	1		0.156537	0.528648	0.00646213	0.746088	0.910586	0.573751
NF-YC	1	2	1	1	0	0		0.822774	0.340849	0.452781	0.861042	1	1
Nin-like	1	2	0	3	1	1		0.891918	0.469991	1	0.38709	0.886159	0.535797
NZZ/SPL	0	0	1	0	1	0		1	1	0.0825095	1	0.214451	1
RAV	1	0	0	1	0	1		0.627924	1	1	0.676204	1	0.288961
S1Fa-like	1	0	0	0	0	0		0.389999	1	1	1	1	1
SBP	1	4	0	7	0	2		0.95981	0.167841	1	0.0220458	1	0.287933
SRS	1	1	1	1	0	1		0.627924	0.526482	0.291415	0.676204	1	0.288961
STAT	0	0	0	0	0	0		1	1	1	1	1	1
TALE	1	4	0	6	1	2		0.968617	0.205099	1	0.104046	0.965978	0.319155
TCP	1	9	0	10	0	2		0.990892	0.0021423	1	0.00777446	1	0.467448
Trihelix	9	6	3	5	2	2		0.0767503	0.244321	0.340879	0.771765	0.981322	0.617455
VOZ	0	0	0	0	0	0		1	1	1	1	1	1
Whirly	0	1	0	1	0	0		1	0.429165	1	0.570744	1	1
WOX	1	0	1	1	1	1		0.627924	1	0.291415	0.676204	0.619242	0.288961
WRKY	22	7	18	9	4	6		0.00138769	0.836583	1.53604e-07	0.939715	0.998649	0.277599
YABBY	0	3	0	4	0	0		1	0.0172632	1	0.0036365	1	1
ZF-HD	2	7	1	8	1	3		0.73067	0.000721623	0.612308	0.00104329	0.929773	0.0546688
