# Supplementary material for: Catabolic reprogramming of Brassica rapa leaf mesophyll protoplasts during the isolation procedure.
Source: Research Square preprint supplement (doi:10.21203/rs.3.rs-1533265/v1), 2022-04-18
Supplement: Supplementary file 2 [file daca2487b959d40484debed2.xlsx]

## Sheet: GO_BP_Leaf3h_Leaf0h.UP
ID	Description	GeneRatio	BgRatio	pvalue	p.adjust	qvalue	Count
GO:0001510	RNA methylation	135/6408	140/13277	1.56407e-36	2.44777e-33	2.1008e-33	135
GO:0009636	response to toxic substance	279/6408	371/13277	6.47116e-27	5.06368e-24	4.3459e-24	279
GO:0006865	amino acid transport	181/6408	221/13277	1.77891e-25	9.27998e-23	7.96452e-23	181
GO:0016192	vesicle-mediated transport	315/6408	443/13277	3.18988e-23	1.24804e-20	1.07113e-20	315
GO:0015711	organic anion transport	202/6408	260/13277	8.73844e-23	2.73513e-20	2.34742e-20	202
GO:0015849	organic acid transport	190/6408	242/13277	1.80978e-22	4.04615e-20	3.4726e-20	190
GO:0046942	carboxylic acid transport	190/6408	242/13277	1.80978e-22	4.04615e-20	3.4726e-20	190
GO:0006820	anion transport	310/6408	443/13277	4.24009e-21	8.29468e-19	7.11889e-19	310
GO:0048193	Golgi vesicle transport	212/6408	286/13277	1.9777e-19	3.43901e-17	2.95152e-17	212
GO:0006606	protein import into nucleus	81/6408	90/13277	3.98778e-17	6.24088e-15	5.35622e-15	81
GO:0034976	response to endoplasmic reticulum stress	227/6408	320/13277	7.39584e-17	1.05223e-14	9.03072e-15	227
GO:0051170	import into nucleus	82/6408	93/13277	4.57487e-16	5.96639e-14	5.12064e-14	82
GO:0034504	protein localization to nucleus	83/6408	95/13277	1.03489e-15	1.24584e-13	1.06924e-13	83
GO:0006913	nucleocytoplasmic transport	113/6408	140/13277	1.72334e-15	1.79802e-13	1.54314e-13	113
GO:0051169	nuclear transport	113/6408	140/13277	1.72334e-15	1.79802e-13	1.54314e-13	113
GO:0009407	toxin catabolic process	139/6408	181/13277	2.49394e-15	2.43939e-13	2.0936e-13	139
GO:0009408	response to heat	185/6408	256/13277	2.98244e-15	2.7456e-13	2.3564e-13	185
GO:0098754	detoxification	145/6408	193/13277	1.59223e-14	1.38436e-12	1.18812e-12	145
GO:0009404	toxin metabolic process	143/6408	191/13277	3.93794e-14	3.24362e-12	2.78383e-12	143
GO:0042542	response to hydrogen peroxide	127/6408	168/13277	3.13974e-13	2.45685e-11	2.10858e-11	127
GO:0043090	amino acid import	63/6408	71/13277	6.37817e-13	4.75325e-11	4.07947e-11	63
GO:0006888	ER to Golgi vesicle-mediated transport	72/6408	84/13277	7.01248e-13	4.98842e-11	4.2813e-11	72
GO:0006626	protein targeting to mitochondrion	80/6408	96/13277	8.79638e-13	5.50653e-11	4.72597e-11	80
GO:0070585	protein localization to mitochondrion	80/6408	96/13277	8.79638e-13	5.50653e-11	4.72597e-11	80
GO:0072655	establishment of protein localization to mitochondrion	80/6408	96/13277	8.79638e-13	5.50653e-11	4.72597e-11	80
GO:0006839	mitochondrial transport	103/6408	132/13277	1.76328e-12	1.06136e-10	9.10908e-11	103
GO:0072594	establishment of protein localization to organelle	280/6408	435/13277	4.62647e-12	2.68164e-10	2.30151e-10	280
GO:0033365	protein localization to organelle	284/6408	443/13277	6.4406e-12	3.59984e-10	3.08955e-10	284
GO:0035966	response to topologically incorrect protein	220/6408	333/13277	2.52454e-11	1.36238e-09	1.16926e-09	220
GO:0006979	response to oxidative stress	264/6408	412/13277	3.89778e-11	2.03334e-09	1.74511e-09	264
GO:0006457	protein folding	168/6408	246/13277	1.18541e-10	5.98442e-09	5.13612e-09	168
GO:0015931	nucleobase-containing compound transport	88/6408	114/13277	2.05493e-10	1.00499e-08	8.6253e-09	88
GO:0007005	mitochondrion organization	86/6408	111/13277	2.35137e-10	1.11512e-08	9.57048e-09	86
GO:0006511	ubiquitin-dependent protein catabolic process	177/6408	264/13277	3.86375e-10	1.77846e-08	1.52636e-08	177
GO:0043043	peptide biosynthetic process	233/6408	363/13277	4.37837e-10	1.95776e-08	1.68024e-08	233
GO:0006518	peptide metabolic process	239/6408	374/13277	4.86539e-10	2.11509e-08	1.81528e-08	239
GO:0000302	response to reactive oxygen species	184/6408	277/13277	5.56299e-10	2.353e-08	2.01945e-08	184
GO:0019941	modification-dependent protein catabolic process	177/6408	266/13277	9.62036e-10	3.86048e-08	3.31325e-08	177
GO:0043632	modification-dependent macromolecule catabolic process	177/6408	266/13277	9.62036e-10	3.86048e-08	3.31325e-08	177
GO:0006412	translation	229/6408	359/13277	1.43278e-09	5.60577e-08	4.81114e-08	229
GO:0015804	neutral amino acid transport	56/6408	68/13277	5.86483e-09	2.23865e-07	1.92132e-07	56
GO:0051603	proteolysis involved in cellular protein catabolic process	214/6408	337/13277	8.62904e-09	3.21535e-07	2.75956e-07	214
GO:0080129	proteasome core complex assembly	86/6408	116/13277	1.07931e-08	3.9282e-07	3.37137e-07	86
GO:0043604	amide biosynthetic process	244/6408	392/13277	1.14194e-08	3.96327e-07	3.40147e-07	244
GO:0043248	proteasome assembly	113/6408	161/13277	1.19726e-08	3.96327e-07	3.40147e-07	113
GO:0051788	response to misfolded protein	113/6408	161/13277	1.19726e-08	3.96327e-07	3.40147e-07	113
GO:0006498	N-terminal protein lipidation	95/6408	131/13277	1.25847e-08	3.96327e-07	3.40147e-07	95
GO:0006499	N-terminal protein myristoylation	95/6408	131/13277	1.25847e-08	3.96327e-07	3.40147e-07	95
GO:0006623	protein targeting to vacuole	84/6408	113/13277	1.29154e-08	3.96327e-07	3.40147e-07	84
GO:0072665	protein localization to vacuole	84/6408	113/13277	1.29154e-08	3.96327e-07	3.40147e-07	84
GO:0072666	establishment of protein localization to vacuole	84/6408	113/13277	1.29154e-08	3.96327e-07	3.40147e-07	84
GO:0043161	proteasome-mediated ubiquitin-dependent protein catabolic process	79/6408	105/13277	1.3862e-08	4.17192e-07	3.58055e-07	79
GO:0018377	protein myristoylation	96/6408	133/13277	1.56651e-08	4.62562e-07	3.96993e-07	96
GO:0015824	proline transport	54/6408	66/13277	1.72856e-08	4.91853e-07	4.22132e-07	54
GO:0051168	nuclear export	54/6408	66/13277	1.72856e-08	4.91853e-07	4.22132e-07	54
GO:0022412	cellular process involved in reproduction in multicellular organism	109/6408	155/13277	1.82638e-08	5.10409e-07	4.38057e-07	109
GO:0031365	N-terminal protein amino acid modification	97/6408	135/13277	1.936e-08	5.31551e-07	4.56203e-07	97
GO:0006611	protein export from nucleus	53/6408	65/13277	2.95339e-08	7.61638e-07	6.53674e-07	53
GO:0006403	RNA localization	51/6408	62/13277	3.06602e-08	7.61638e-07	6.53674e-07	51
GO:0006405	RNA export from nucleus	51/6408	62/13277	3.06602e-08	7.61638e-07	6.53674e-07	51
GO:0050657	nucleic acid transport	51/6408	62/13277	3.06602e-08	7.61638e-07	6.53674e-07	51
GO:0050658	RNA transport	51/6408	62/13277	3.06602e-08	7.61638e-07	6.53674e-07	51
GO:0051236	establishment of RNA localization	51/6408	62/13277	3.06602e-08	7.61638e-07	6.53674e-07	51
GO:0031503	protein-containing complex localization	50/6408	61/13277	5.26622e-08	1.24873e-06	1.07172e-06	50
GO:0071166	ribonucleoprotein complex localization	50/6408	61/13277	5.26622e-08	1.24873e-06	1.07172e-06	50
GO:0071426	ribonucleoprotein complex export from nucleus	50/6408	61/13277	5.26622e-08	1.24873e-06	1.07172e-06	50
GO:0006497	protein lipidation	99/6408	141/13277	9.23526e-08	2.09466e-06	1.79774e-06	99
GO:0042157	lipoprotein metabolic process	99/6408	141/13277	9.23526e-08	2.09466e-06	1.79774e-06	99
GO:0042158	lipoprotein biosynthetic process	99/6408	141/13277	9.23526e-08	2.09466e-06	1.79774e-06	99
GO:0009560	embryo sac egg cell differentiation	93/6408	131/13277	9.74449e-08	2.16007e-06	1.85388e-06	93
GO:0009553	embryo sac development	139/6408	210/13277	9.79968e-08	2.16007e-06	1.85388e-06	139
GO:0007034	vacuolar transport	88/6408	123/13277	1.20905e-07	2.62801e-06	2.25549e-06	88
GO:0000741	karyogamy	39/6408	46/13277	2.77411e-07	5.86687e-06	5.03523e-06	39
GO:0048284	organelle fusion	39/6408	46/13277	2.77411e-07	5.86687e-06	5.03523e-06	39
GO:0010498	proteasomal protein catabolic process	117/6408	174/13277	2.83012e-07	5.90552e-06	5.0684e-06	117
GO:0010286	heat acclimation	59/6408	77/13277	3.18193e-07	6.55227e-06	5.62347e-06	59
GO:0048229	gametophyte development	237/6408	390/13277	3.25284e-07	6.6113e-06	5.67413e-06	237
GO:0007292	female gamete generation	94/6408	135/13277	3.60868e-07	7.24049e-06	6.21414e-06	94
GO:0006406	mRNA export from nucleus	46/6408	57/13277	4.4236e-07	8.54683e-06	7.3353e-06	46
GO:0051028	mRNA transport	46/6408	57/13277	4.4236e-07	8.54683e-06	7.3353e-06	46
GO:0071427	mRNA-containing ribonucleoprotein complex export from nucleus	46/6408	57/13277	4.4236e-07	8.54683e-06	7.3353e-06	46
GO:0009561	megagametogenesis	110/6408	163/13277	4.82088e-07	9.20083e-06	7.8966e-06	110
GO:0007276	gamete generation	113/6408	170/13277	1.0988e-06	2.07184e-05	1.77815e-05	113
GO:0043543	protein acylation	106/6408	158/13277	1.1989e-06	2.23366e-05	1.91704e-05	106
GO:0009644	response to high light intensity	129/6408	199/13277	1.56605e-06	2.88337e-05	2.47465e-05	129
GO:1901293	nucleoside phosphate biosynthetic process	251/6408	424/13277	2.86724e-06	5.18689e-05	4.45164e-05	251
GO:0009723	response to ethylene	184/6408	300/13277	2.88345e-06	5.18689e-05	4.45164e-05	184
GO:0010260	animal organ senescence	26/6408	29/13277	3.27216e-06	5.81924e-05	4.99435e-05	26
GO:0009165	nucleotide biosynthetic process	250/6408	423/13277	3.56621e-06	6.27091e-05	5.382e-05	250
GO:0046482	para-aminobenzoic acid metabolic process	30/6408	35/13277	4.42685e-06	7.6978e-05	6.60662e-05	30
GO:0017038	protein import	127/6408	200/13277	8.93253e-06	0.00015362	0.000131844	127
GO:0002679	respiratory burst involved in defense response	77/6408	113/13277	1.42474e-05	0.000239755	0.000205769	77
GO:0045730	respiratory burst	77/6408	113/13277	1.42474e-05	0.000239755	0.000205769	77
GO:0009218	pyrimidine ribonucleotide metabolic process	81/6408	120/13277	1.4927e-05	0.000245902	0.000211045	81
GO:0009220	pyrimidine ribonucleotide biosynthetic process	81/6408	120/13277	1.4927e-05	0.000245902	0.000211045	81
GO:0006997	nucleus organization	55/6408	76/13277	1.62187e-05	0.000264399	0.00022692	55
GO:0010583	response to cyclopentenone	82/6408	122/13277	1.694e-05	0.00027331	0.000234568	82
GO:0044257	cellular protein catabolic process	215/6408	364/13277	1.78327e-05	0.000284777	0.000244409	215
GO:0006220	pyrimidine nucleotide metabolic process	81/6408	121/13277	2.38902e-05	0.000373882	0.000320883	81
GO:0006221	pyrimidine nucleotide biosynthetic process	81/6408	121/13277	2.38902e-05	0.000373882	0.000320883	81
GO:0009642	response to light intensity	153/6408	251/13277	3.0671e-05	0.000475249	0.000407881	153
GO:0043069	negative regulation of programmed cell death	99/6408	154/13277	4.10457e-05	0.00062977	0.000540499	99
GO:0060548	negative regulation of cell death	101/6408	158/13277	4.83548e-05	0.000734712	0.000630565	101
GO:0009414	response to water deprivation	217/6408	372/13277	4.94792e-05	0.000744567	0.000639023	217
GO:0010167	response to nitrate	81/6408	123/13277	5.83232e-05	0.000869293	0.000746069	81
GO:0030163	protein catabolic process	217/6408	373/13277	6.22622e-05	0.000919249	0.000788943	217
GO:0006006	glucose metabolic process	139/6408	228/13277	6.87407e-05	0.00100541	0.000862894	139
GO:0015706	nitrate transport	84/6408	129/13277	7.86127e-05	0.00113036	0.000970126	84
GO:0010243	response to organonitrogen compound	236/6408	410/13277	7.87277e-05	0.00113036	0.000970126	236
GO:0009415	response to water	218/6408	376/13277	8.00286e-05	0.00113859	0.000977192	218
GO:0009620	response to fungus	249/6408	435/13277	8.38908e-05	0.00118278	0.00101512	249
GO:0051604	protein maturation	48/6408	67/13277	8.49288e-05	0.00118673	0.00101851	48
GO:0072528	pyrimidine-containing compound biosynthetic process	83/6408	128/13277	0.000107529	0.00148922	0.00127812	83
GO:0010200	response to chitin	224/6408	389/13277	0.000114631	0.00157366	0.00135059	224
GO:0009611	response to wounding	178/6408	303/13277	0.000136596	0.00185889	0.00159539	178
GO:0030968	endoplasmic reticulum unfolded protein response	106/6408	170/13277	0.000139871	0.00188705	0.00161956	106
GO:0009699	phenylpropanoid biosynthetic process	65/6408	97/13277	0.000141653	0.00189476	0.00162617	65
GO:0006986	response to unfolded protein	107/6408	172/13277	0.000148747	0.00193991	0.00166492	107
GO:0034620	cellular response to unfolded protein	107/6408	172/13277	0.000148747	0.00193991	0.00166492	107
GO:0035967	cellular response to topologically incorrect protein	107/6408	172/13277	0.000148747	0.00193991	0.00166492	107
GO:0042538	hyperosmotic salinity response	92/6408	145/13277	0.000153776	0.00198892	0.00170698	92
GO:0006891	intra-Golgi vesicle-mediated transport	42/6408	58/13277	0.000158167	0.00202895	0.00174134	42
GO:0009062	fatty acid catabolic process	115/6408	187/13277	0.000170366	0.00216767	0.0018604	115
GO:0071215	cellular response to abscisic acid stimulus	148/6408	248/13277	0.000177043	0.00221658	0.00190238	148
GO:0097306	cellular response to alcohol	148/6408	248/13277	0.000177043	0.00221658	0.00190238	148
GO:0009627	systemic acquired resistance	216/6408	376/13277	0.000182158	0.00226251	0.0019418	216
GO:0072527	pyrimidine-containing compound metabolic process	85/6408	133/13277	0.000188257	0.00231986	0.00199102	85
GO:0019953	sexual reproduction	136/6408	226/13277	0.000189833	0.002321	0.001992	136
GO:0009698	phenylpropanoid metabolic process	86/6408	135/13277	0.000203624	0.00247032	0.00212015	86
GO:0019319	hexose biosynthetic process	93/6408	148/13277	0.000235627	0.00283658	0.00243449	93
GO:0072329	monocarboxylic acid catabolic process	119/6408	196/13277	0.000281341	0.00336106	0.00288462	119
GO:0019318	hexose metabolic process	147/6408	248/13277	0.000287661	0.00340469	0.00292207	147
GO:0009451	RNA modification	163/6408	278/13277	0.000291443	0.00340469	0.00292207	163
GO:0006094	gluconeogenesis	91/6408	145/13277	0.00029152	0.00340469	0.00292207	91
GO:0006397	mRNA processing	73/6408	113/13277	0.000323649	0.00375193	0.00322009	73
GO:0032259	methylation	253/6408	450/13277	0.000349533	0.00399284	0.00342685	253
GO:0043414	macromolecule methylation	253/6408	450/13277	0.000349533	0.00399284	0.00342685	253
GO:0006635	fatty acid beta-oxidation	95/6408	153/13277	0.000375171	0.00425314	0.00365025	95
GO:0043603	cellular amide metabolic process	272/6408	487/13277	0.000377755	0.00425314	0.00365025	272
GO:0044265	cellular macromolecule catabolic process	273/6408	489/13277	0.00038251	0.00427591	0.00366979	273
GO:0048609	multicellular organismal reproductive process	184/6408	319/13277	0.000400748	0.00442171	0.00379492	184
GO:0015802	basic amino acid transport	22/6408	27/13277	0.000401203	0.00442171	0.00379492	22
GO:0044703	multi-organism reproductive process	136/6408	229/13277	0.000424842	0.0046495	0.00399042	136
GO:0015698	inorganic anion transport	104/6408	170/13277	0.000448488	0.00487419	0.00418327	104
GO:0046364	monosaccharide biosynthetic process	99/6408	161/13277	0.000470523	0.00507841	0.00435853	99
GO:0032504	multicellular organism reproduction	194/6408	339/13277	0.000497108	0.00532859	0.00457325	194
GO:0000398	mRNA splicing, via spliceosome	57/6408	86/13277	0.000548387	0.00583827	0.00501068	57
GO:0005996	monosaccharide metabolic process	170/6408	294/13277	0.000556548	0.00588512	0.00505089	170
GO:0010030	positive regulation of seed germination	13/6408	14/13277	0.000592466	0.00622288	0.00534077	13
GO:0009738	abscisic acid-activated signaling pathway	139/6408	236/13277	0.000604828	0.00631037	0.00541586	139
GO:0044242	cellular lipid catabolic process	122/6408	205/13277	0.000731394	0.00758034	0.00650581	122
GO:0019395	fatty acid oxidation	96/6408	157/13277	0.000746559	0.00768661	0.00659702	96
GO:0009260	ribonucleotide biosynthetic process	189/6408	332/13277	0.00083036	0.0084384	0.00724224	189
GO:0046390	ribose phosphate biosynthetic process	189/6408	332/13277	0.00083036	0.0084384	0.00724224	189
GO:0016197	endosomal transport	24/6408	31/13277	0.000874063	0.00882522	0.00757422	24
GO:0050832	defense response to fungus	172/6408	300/13277	0.000895265	0.00898135	0.00770822	172

## Sheet: GO_BP_Leaf3h_Leaf0h.DW
ID	Description	GeneRatio	BgRatio	pvalue	p.adjust	qvalue	Count
GO:0009657	plastid organization	340/6869	364/13277	8.38012e-70	1.31316e-66	8.92703e-67	340
GO:0015979	photosynthesis	297/6869	314/13277	1.38247e-64	1.08317e-61	7.3635e-62	297
GO:0019684	photosynthesis, light reaction	243/6869	252/13277	5.87118e-58	3.06671e-55	2.08478e-55	243
GO:0019682	glyceraldehyde-3-phosphate metabolic process	284/6869	315/13277	7.13658e-50	2.79576e-47	1.90058e-47	284
GO:0019288	isopentenyl diphosphate biosynthetic process, methylerythritol 4-phosphate pathway	211/6869	222/13277	4.38081e-47	1.37295e-44	9.33344e-45	211
GO:0009240	isopentenyl diphosphate biosynthetic process	211/6869	225/13277	2.6935e-44	6.02958e-42	4.09897e-42	211
GO:0046490	isopentenyl diphosphate metabolic process	211/6869	225/13277	2.6935e-44	6.02958e-42	4.09897e-42	211
GO:0009658	chloroplast organization	207/6869	221/13277	3.07314e-43	6.01951e-41	4.09212e-41	207
GO:0009668	plastid membrane organization	181/6869	189/13277	5.8856e-42	9.22273e-40	6.26971e-40	181
GO:0010027	thylakoid membrane organization	181/6869	189/13277	5.8856e-42	9.22273e-40	6.26971e-40	181
GO:0006081	cellular aldehyde metabolic process	333/6869	403/13277	1.37462e-39	1.95821e-37	1.33121e-37	333
GO:0008299	isoprenoid biosynthetic process	318/6869	382/13277	3.85262e-39	5.03088e-37	3.42005e-37	318
GO:0010207	photosystem II assembly	144/6869	146/13277	7.52297e-39	9.06808e-37	6.16457e-37	144
GO:0005982	starch metabolic process	198/6869	215/13277	2.05896e-38	2.30457e-36	1.56667e-36	198
GO:0019252	starch biosynthetic process	169/6869	178/13277	1.05496e-37	1.10208e-35	7.49205e-36	169
GO:0006720	isoprenoid metabolic process	326/6869	399/13277	8.41135e-37	8.23787e-35	5.60019e-35	326
GO:0061024	membrane organization	186/6869	202/13277	4.03364e-36	3.71807e-34	2.52758e-34	186
GO:0000023	maltose metabolic process	137/6869	143/13277	4.78052e-32	4.16171e-30	2.82917e-30	137
GO:0008654	phospholipid biosynthetic process	284/6869	351/13277	9.7225e-31	8.0185e-29	5.45106e-29	284
GO:0006644	phospholipid metabolic process	292/6869	366/13277	1.5043e-29	1.17862e-27	8.01238e-28	292
GO:0046148	pigment biosynthetic process	199/6869	234/13277	2.52936e-27	1.88739e-25	1.28306e-25	199
GO:0044272	sulfur compound biosynthetic process	328/6869	429/13277	8.29939e-27	5.91143e-25	4.01865e-25	328
GO:0051656	establishment of organelle localization	99/6869	101/13277	4.00526e-26	2.7288e-24	1.85507e-24	99
GO:0010016	shoot system morphogenesis	309/6869	403/13277	1.11822e-25	7.30105e-24	4.96333e-24	309
GO:0009902	chloroplast relocation	96/6869	98/13277	2.77966e-25	1.55562e-23	1.05753e-23	96
GO:0019750	chloroplast localization	96/6869	98/13277	2.77966e-25	1.55562e-23	1.05753e-23	96
GO:0051644	plastid localization	96/6869	98/13277	2.77966e-25	1.55562e-23	1.05753e-23	96
GO:0051667	establishment of plastid localization	96/6869	98/13277	2.77966e-25	1.55562e-23	1.05753e-23	96
GO:0005984	disaccharide metabolic process	153/6869	173/13277	3.63116e-25	1.96208e-23	1.33384e-23	153
GO:0009311	oligosaccharide metabolic process	163/6869	187/13277	3.98398e-25	2.08097e-23	1.41466e-23	163
GO:0016109	tetraterpenoid biosynthetic process	94/6869	97/13277	1.60511e-23	7.86e-22	5.34331e-22	94
GO:0016117	carotenoid biosynthetic process	94/6869	97/13277	1.60511e-23	7.86e-22	5.34331e-22	94
GO:0015995	chlorophyll biosynthetic process	109/6869	117/13277	9.70823e-23	4.60994e-21	3.13389e-21	109
GO:0006073	cellular glucan metabolic process	268/6869	349/13277	1.3997e-22	6.26664e-21	4.26013e-21	268
GO:0044042	glucan metabolic process	268/6869	349/13277	1.3997e-22	6.26664e-21	4.26013e-21	268
GO:0033014	tetrapyrrole biosynthetic process	128/6869	143/13277	2.33598e-22	1.0168e-20	6.9123e-21	128
GO:0044093	positive regulation of molecular function	104/6869	111/13277	2.75893e-22	1.16845e-20	7.94322e-21	104
GO:0010103	stomatal complex morphogenesis	116/6869	127/13277	3.52129e-22	1.45207e-20	9.87132e-21	116
GO:0043085	positive regulation of catalytic activity	103/6869	110/13277	5.03408e-22	2.02267e-20	1.37503e-20	103
GO:0009069	serine family amino acid metabolic process	189/6869	231/13277	6.5019e-22	2.54712e-20	1.73156e-20	189
GO:0006779	porphyrin-containing compound biosynthetic process	126/6869	141/13277	7.11313e-22	2.7186e-20	1.84814e-20	126
GO:0016108	tetraterpenoid metabolic process	95/6869	100/13277	1.01759e-21	3.7083e-20	2.52094e-20	95
GO:0016116	carotenoid metabolic process	95/6869	100/13277	1.01759e-21	3.7083e-20	2.52094e-20	95
GO:0009250	glucan biosynthetic process	213/6869	268/13277	1.82921e-21	6.51447e-20	4.4286e-20	213
GO:0006098	pentose-phosphate shunt	144/6869	167/13277	2.46053e-21	8.38184e-20	5.69806e-20	144
GO:0051156	glucose 6-phosphate metabolic process	144/6869	167/13277	2.46053e-21	8.38184e-20	5.69806e-20	144
GO:0042440	pigment metabolic process	239/6869	310/13277	1.14968e-20	3.83309e-19	2.60577e-19	239
GO:0019344	cysteine biosynthetic process	157/6869	187/13277	1.24567e-20	4.0666e-19	2.76452e-19	157
GO:0009070	serine family amino acid biosynthetic process	159/6869	190/13277	1.39042e-20	4.44652e-19	3.02279e-19	159
GO:0006534	cysteine metabolic process	158/6869	189/13277	2.27287e-20	7.12318e-19	4.84241e-19	158
GO:0006739	NADP metabolic process	145/6869	171/13277	5.45285e-20	1.67541e-18	1.13896e-18	145
GO:0006091	generation of precursor metabolites and energy	340/6869	477/13277	6.63916e-19	2.00068e-17	1.36009e-17	340
GO:0010374	stomatal complex development	153/6869	185/13277	7.41141e-19	2.19126e-17	1.48964e-17	153
GO:0033013	tetrapyrrole metabolic process	168/6869	208/13277	1.63672e-18	4.74951e-17	3.22877e-17	168
GO:0051640	organelle localization	131/6869	154/13277	1.97135e-18	5.61656e-17	3.81819e-17	131
GO:0006778	porphyrin-containing compound metabolic process	167/6869	207/13277	2.58313e-18	7.22814e-17	4.91377e-17	167
GO:0006090	pyruvate metabolic process	289/6869	398/13277	4.80453e-18	1.32082e-16	8.9791e-17	289
GO:0015994	chlorophyll metabolic process	149/6869	181/13277	5.00607e-18	1.3525e-16	9.19445e-17	149
GO:0000096	sulfur amino acid metabolic process	232/6869	308/13277	7.01895e-18	1.86418e-16	1.26729e-16	232
GO:0000271	polysaccharide biosynthetic process	346/6869	493/13277	1.63051e-17	4.25836e-16	2.89488e-16	346
GO:0042793	plastid transcription	68/6869	70/13277	1.72205e-17	4.4237e-16	3.00728e-16	68
GO:0000097	sulfur amino acid biosynthetic process	207/6869	272/13277	6.06432e-17	1.53271e-15	1.04195e-15	207
GO:0016556	mRNA modification	94/6869	105/13277	9.25974e-17	2.30318e-15	1.56572e-15	94
GO:0008652	cellular amino acid biosynthetic process	293/6869	410/13277	1.07589e-16	2.63424e-15	1.79079e-15	293
GO:0090626	plant epidermis morphogenesis	200/6869	263/13277	2.36297e-16	5.69657e-15	3.87259e-15	200
GO:0044264	cellular polysaccharide metabolic process	346/6869	499/13277	2.99474e-16	7.11024e-15	4.83362e-15	346
GO:0009767	photosynthetic electron transport chain	61/6869	63/13277	1.45247e-15	3.39704e-14	2.30934e-14	61
GO:0050790	regulation of catalytic activity	142/6869	177/13277	2.22358e-15	5.12405e-14	3.48339e-14	142
GO:0009637	response to blue light	100/6869	116/13277	3.40403e-15	7.7306e-14	5.25534e-14	100
GO:0006364	rRNA processing	172/6869	225/13277	1.28542e-14	2.87752e-13	1.95617e-13	172
GO:0046785	microtubule polymerization	61/6869	64/13277	1.52878e-14	3.37407e-13	2.29373e-13	61
GO:0016072	rRNA metabolic process	173/6869	228/13277	3.61356e-14	7.86452e-13	5.34638e-13	173
GO:0031109	microtubule polymerization or depolymerization	63/6869	67/13277	3.67671e-14	7.89234e-13	5.3653e-13	63
GO:0007020	microtubule nucleation	59/6869	62/13277	5.23525e-14	1.1086e-12	7.53638e-13	59
GO:0000226	microtubule cytoskeleton organization	166/6869	218/13277	6.88802e-14	1.43914e-12	9.78341e-13	166
GO:0007017	microtubule-based process	173/6869	229/13277	7.25904e-14	1.4967e-12	1.01747e-12	173
GO:0010218	response to far red light	79/6869	89/13277	8.36967e-14	1.70328e-12	1.15791e-12	79
GO:0033692	cellular polysaccharide biosynthetic process	291/6869	420/13277	8.66396e-14	1.74057e-12	1.18326e-12	291
GO:0090698	post-embryonic plant morphogenesis	263/6869	374/13277	9.30396e-14	1.84548e-12	1.25458e-12	263
GO:0051258	protein polymerization	131/6869	165/13277	1.22091e-13	2.39146e-12	1.62574e-12	131
GO:0035303	regulation of dephosphorylation	106/6869	128/13277	1.51418e-13	2.89357e-12	1.96708e-12	106
GO:0035304	regulation of protein dephosphorylation	106/6869	128/13277	1.51418e-13	2.89357e-12	1.96708e-12	106
GO:1901607	alpha-amino acid biosynthetic process	244/6869	344/13277	1.61495e-13	3.04894e-12	2.0727e-12	244
GO:0016114	terpenoid biosynthetic process	150/6869	195/13277	2.6019e-13	4.85378e-12	3.29965e-12	150
GO:0016143	S-glycoside metabolic process	136/6869	174/13277	3.89346e-13	7.0127e-12	4.7673e-12	136
GO:0019757	glycosinolate metabolic process	136/6869	174/13277	3.89346e-13	7.0127e-12	4.7673e-12	136
GO:0019760	glucosinolate metabolic process	136/6869	174/13277	3.89346e-13	7.0127e-12	4.7673e-12	136
GO:0034637	cellular carbohydrate biosynthetic process	304/6869	445/13277	3.9961e-13	7.11578e-12	4.83738e-12	304
GO:0009965	leaf morphogenesis	147/6869	191/13277	4.18683e-13	7.37164e-12	5.01132e-12	147
GO:0019220	regulation of phosphate metabolic process	139/6869	179/13277	5.35604e-13	9.22298e-12	6.26988e-12	139
GO:0051174	regulation of phosphorus metabolic process	139/6869	179/13277	5.35604e-13	9.22298e-12	6.26988e-12	139
GO:0097435	supramolecular fiber organization	157/6869	207/13277	5.88725e-13	1.00275e-11	6.81682e-12	157
GO:0034660	ncRNA metabolic process	231/6869	326/13277	8.57059e-13	1.4441e-11	9.81713e-12	231
GO:0016144	S-glycoside biosynthetic process	118/6869	148/13277	1.17697e-12	1.92116e-11	1.30602e-11	118
GO:0019758	glycosinolate biosynthetic process	118/6869	148/13277	1.17697e-12	1.92116e-11	1.30602e-11	118
GO:0019761	glucosinolate biosynthetic process	118/6869	148/13277	1.17697e-12	1.92116e-11	1.30602e-11	118
GO:0010155	regulation of proton transport	66/6869	73/13277	1.27789e-12	2.06438e-11	1.40339e-11	66
GO:0045036	protein targeting to chloroplast	56/6869	60/13277	2.44317e-12	3.82844e-11	2.60262e-11	56
GO:0072596	establishment of protein localization to chloroplast	56/6869	60/13277	2.44317e-12	3.82844e-11	2.60262e-11	56
GO:0072598	protein localization to chloroplast	56/6869	60/13277	2.44317e-12	3.82844e-11	2.60262e-11	56
GO:0010075	regulation of meristem growth	116/6869	146/13277	2.84139e-12	4.40838e-11	2.99686e-11	116
GO:0009773	photosynthetic electron transport in photosystem I	44/6869	45/13277	5.3259e-12	8.13067e-11	5.52731e-11	44
GO:1901605	alpha-amino acid metabolic process	314/6869	468/13277	5.34435e-12	8.13067e-11	5.52731e-11	314
GO:0006721	terpenoid metabolic process	158/6869	212/13277	5.97916e-12	9.00898e-11	6.1244e-11	158
GO:0035266	meristem growth	120/6869	153/13277	6.17046e-12	9.20867e-11	6.26015e-11	120
GO:0051246	regulation of protein metabolic process	178/6869	244/13277	6.7205e-12	9.93493e-11	6.75387e-11	178
GO:0031399	regulation of protein modification process	141/6869	186/13277	9.55871e-12	1.39986e-10	9.5164e-11	141
GO:0034470	ncRNA processing	185/6869	256/13277	1.04061e-11	1.50984e-10	1.02641e-10	185
GO:1901659	glycosyl compound biosynthetic process	122/6869	157/13277	1.30397e-11	1.8746e-10	1.27437e-10	122
GO:1904062	regulation of cation transmembrane transport	66/6869	75/13277	2.39821e-11	3.41637e-10	2.32248e-10	66
GO:0065009	regulation of molecular function	154/6869	208/13277	2.65963e-11	3.75463e-10	2.55244e-10	154
GO:0032268	regulation of cellular protein metabolic process	174/6869	240/13277	2.75209e-11	3.85047e-10	2.61759e-10	174
GO:0016226	iron-sulfur cluster assembly	77/6869	91/13277	3.92476e-11	5.39482e-10	3.66746e-10	77
GO:0031163	metallo-sulfur cluster assembly	77/6869	91/13277	3.92476e-11	5.39482e-10	3.66746e-10	77
GO:1902600	proton transmembrane transport	72/6869	84/13277	4.77398e-11	6.50507e-10	4.42221e-10	72
GO:0048509	regulation of meristem development	140/6869	187/13277	5.49728e-11	7.42607e-10	5.04832e-10	140
GO:0048437	floral organ development	282/6869	421/13277	8.73214e-11	1.16951e-09	7.95045e-10	282
GO:0007010	cytoskeleton organization	279/6869	417/13277	1.3304e-10	1.76672e-09	1.20104e-09	279
GO:0035670	plant-type ovary development	99/6869	126/13277	3.64252e-10	4.75652e-09	3.23353e-09	99
GO:0048481	plant ovule development	99/6869	126/13277	3.64252e-10	4.75652e-09	3.23353e-09	99
GO:0006636	unsaturated fatty acid biosynthetic process	58/6869	66/13277	4.54782e-10	5.84135e-09	3.97101e-09	58
GO:0033559	unsaturated fatty acid metabolic process	58/6869	66/13277	4.54782e-10	5.84135e-09	3.97101e-09	58
GO:0046471	phosphatidylglycerol metabolic process	55/6869	62/13277	5.78968e-10	7.37596e-09	5.01425e-09	55
GO:0010114	response to red light	75/6869	91/13277	8.82459e-10	1.11517e-08	7.58106e-09	75
GO:0006655	phosphatidylglycerol biosynthetic process	54/6869	61/13277	9.98659e-10	1.25192e-08	8.51068e-09	54
GO:0006733	oxidoreduction coenzyme metabolic process	261/6869	392/13277	1.10621e-09	1.36971e-08	9.31146e-09	261
GO:0016311	dephosphorylation	137/6869	187/13277	1.11011e-09	1.36971e-08	9.31146e-09	137
GO:0048438	floral whorl development	230/6869	341/13277	1.87287e-09	2.2928e-08	1.55867e-08	230
GO:1901657	glycosyl compound metabolic process	146/6869	203/13277	2.7022e-09	3.28244e-08	2.23144e-08	146
GO:0006470	protein dephosphorylation	122/6869	165/13277	3.52727e-09	4.25172e-08	2.89036e-08	122
GO:0098660	inorganic ion transmembrane transport	91/6869	118/13277	1.03892e-08	1.24274e-07	8.44825e-08	91
GO:0098662	inorganic cation transmembrane transport	89/6869	115/13277	1.1072e-08	1.31438e-07	8.93528e-08	89
GO:0032535	regulation of cellular component size	110/6869	148/13277	1.26713e-08	1.48178e-07	1.00733e-07	110
GO:0090066	regulation of anatomical structure size	110/6869	148/13277	1.26713e-08	1.48178e-07	1.00733e-07	110
GO:0010073	meristem maintenance	166/6869	239/13277	1.46717e-08	1.70301e-07	1.15772e-07	166
GO:0098655	cation transmembrane transport	90/6869	117/13277	1.56277e-08	1.80063e-07	1.22409e-07	90
GO:0006305	DNA alkylation	117/6869	160/13277	2.16357e-08	2.45675e-07	1.67012e-07	117
GO:0006306	DNA methylation	117/6869	160/13277	2.16357e-08	2.45675e-07	1.67012e-07	117
GO:0022900	electron transport chain	65/6869	80/13277	3.58318e-08	4.03946e-07	2.74607e-07	65
GO:0006304	DNA modification	117/6869	161/13277	3.89642e-08	4.33028e-07	2.94377e-07	117
GO:0044728	DNA methylation or demethylation	117/6869	161/13277	3.89642e-08	4.33028e-07	2.94377e-07	117
GO:0072511	divalent inorganic cation transport	130/6869	183/13277	6.66979e-08	7.36025e-07	5.00358e-07	130
GO:0031328	positive regulation of cellular biosynthetic process	264/6869	409/13277	7.26824e-08	7.96457e-07	5.4144e-07	264
GO:0031325	positive regulation of cellular metabolic process	276/6869	430/13277	7.90927e-08	8.60683e-07	5.85101e-07	276
GO:0051173	positive regulation of nitrogen compound metabolic process	269/6869	418/13277	8.17794e-08	8.83782e-07	6.00804e-07	269
GO:0070838	divalent metal ion transport	129/6869	182/13277	9.25647e-08	9.93485e-07	6.75382e-07	129
GO:0046496	nicotinamide nucleotide metabolic process	226/6869	345/13277	1.11739e-07	1.19112e-06	8.09737e-07	226
GO:0016458	gene silencing	224/6869	342/13277	1.29482e-07	1.36911e-06	9.30734e-07	224
GO:0072524	pyridine-containing compound metabolic process	231/6869	354/13277	1.30183e-07	1.36911e-06	9.30734e-07	231
GO:0019362	pyridine nucleotide metabolic process	228/6869	349/13277	1.3662e-07	1.42722e-06	9.7024e-07	228
GO:0006633	fatty acid biosynthetic process	95/6869	128/13277	1.38861e-07	1.44102e-06	9.79623e-07	95
GO:0031047	gene silencing by RNA	183/6869	273/13277	1.65623e-07	1.70745e-06	1.16074e-06	183
GO:0098586	cellular response to virus	73/6869	94/13277	1.79719e-07	1.83794e-06	1.24945e-06	73
GO:0010604	positive regulation of macromolecule metabolic process	271/6869	424/13277	1.80628e-07	1.83794e-06	1.24945e-06	271
GO:0031324	negative regulation of cellular metabolic process	268/6869	419/13277	1.92242e-07	1.94351e-06	1.32122e-06	268
GO:0042737	drug catabolic process	94/6869	127/13277	2.01186e-07	2.02089e-06	1.37382e-06	94
GO:0045935	positive regulation of nucleobase-containing compound metabolic process	251/6869	390/13277	2.19586e-07	2.19166e-06	1.48992e-06	251
GO:0009616	virus induced gene silencing	72/6869	93/13277	2.72235e-07	2.6662e-06	1.81251e-06	72
GO:0052018	modulation by symbiont of RNA levels in host	72/6869	93/13277	2.72235e-07	2.6662e-06	1.81251e-06	72
GO:0052249	modulation of RNA levels in other organism involved in symbiotic interaction	72/6869	93/13277	2.72235e-07	2.6662e-06	1.81251e-06	72
GO:0010557	positive regulation of macromolecule biosynthetic process	259/6869	405/13277	3.14927e-07	3.06516e-06	2.08373e-06	259
GO:0048366	leaf development	234/6869	362/13277	3.37452e-07	3.20159e-06	2.17648e-06	234
GO:0045893	positive regulation of transcription, DNA-templated	245/6869	381/13277	3.3916e-07	3.20159e-06	2.17648e-06	245
GO:0051254	positive regulation of RNA metabolic process	245/6869	381/13277	3.3916e-07	3.20159e-06	2.17648e-06	245
GO:1902680	positive regulation of RNA biosynthetic process	245/6869	381/13277	3.3916e-07	3.20159e-06	2.17648e-06	245
GO:1903508	positive regulation of nucleic acid-templated transcription	245/6869	381/13277	3.3916e-07	3.20159e-06	2.17648e-06	245
GO:0007389	pattern specification process	183/6869	275/13277	3.60067e-07	3.37859e-06	2.2968e-06	183
GO:0010628	positive regulation of gene expression	257/6869	402/13277	3.63601e-07	3.39145e-06	2.30554e-06	257
GO:0009825	multidimensional cell growth	73/6869	95/13277	3.83528e-07	3.55614e-06	2.4175e-06	73
GO:0010608	posttranscriptional regulation of gene expression	162/6869	240/13277	4.26752e-07	3.93365e-06	2.67413e-06	162
GO:0051607	defense response to virus	100/6869	138/13277	4.69691e-07	4.30413e-06	2.92599e-06	100
GO:0034762	regulation of transmembrane transport	74/6869	97/13277	5.31552e-07	4.81469e-06	3.27308e-06	74
GO:0034765	regulation of ion transmembrane transport	74/6869	97/13277	5.31552e-07	4.81469e-06	3.27308e-06	74
GO:0048440	carpel development	120/6869	171/13277	6.09319e-07	5.48737e-06	3.73037e-06	120
GO:0006084	acetyl-CoA metabolic process	58/6869	73/13277	8.39181e-07	7.44056e-06	5.05817e-06	58
GO:0043473	pigmentation	71/6869	93/13277	8.59439e-07	7.44056e-06	5.05817e-06	71
GO:0043476	pigment accumulation	71/6869	93/13277	8.59439e-07	7.44056e-06	5.05817e-06	71
GO:0043478	pigment accumulation in response to UV light	71/6869	93/13277	8.59439e-07	7.44056e-06	5.05817e-06	71
GO:0043479	pigment accumulation in tissues in response to UV light	71/6869	93/13277	8.59439e-07	7.44056e-06	5.05817e-06	71
GO:0043480	pigment accumulation in tissues	71/6869	93/13277	8.59439e-07	7.44056e-06	5.05817e-06	71
GO:0043481	anthocyanin accumulation in tissues in response to UV light	71/6869	93/13277	8.59439e-07	7.44056e-06	5.05817e-06	71
GO:0010304	PSII associated light-harvesting complex II catabolic process	25/6869	26/13277	8.96532e-07	7.71904e-06	5.24749e-06	25
GO:0042135	neurotransmitter catabolic process	41/6869	48/13277	9.62685e-07	8.24332e-06	5.60389e-06	41
GO:0010267	production of ta-siRNAs involved in RNA interference	76/6869	101/13277	9.76785e-07	8.27363e-06	5.6245e-06	76
GO:0019751	polyol metabolic process	76/6869	101/13277	9.76785e-07	8.27363e-06	5.6245e-06	76
GO:0048507	meristem development	260/6869	411/13277	1.11956e-06	9.43198e-06	6.41196e-06	260
GO:0051172	negative regulation of nitrogen compound metabolic process	255/6869	403/13277	1.37886e-06	1.15544e-05	7.8548e-06	255
GO:1903047	mitotic cell cycle process	150/6869	223/13277	1.55232e-06	1.29387e-05	8.7959e-06	150
GO:0040029	regulation of gene expression, epigenetic	208/6869	322/13277	1.61496e-06	1.33897e-05	9.10244e-06	208
GO:0048467	gynoecium development	124/6869	180/13277	1.89714e-06	1.56464e-05	1.06366e-05	124
GO:0000281	mitotic cytokinesis	130/6869	190/13277	1.91607e-06	1.56653e-05	1.06494e-05	130
GO:0007623	circadian rhythm	107/6869	152/13277	1.92942e-06	1.56653e-05	1.06494e-05	107
GO:0048511	rhythmic process	107/6869	152/13277	1.92942e-06	1.56653e-05	1.06494e-05	107
GO:0048638	regulation of developmental growth	149/6869	222/13277	2.04196e-06	1.64936e-05	1.12125e-05	149
GO:0015672	monovalent inorganic cation transport	116/6869	167/13277	2.12347e-06	1.70301e-05	1.15773e-05	116
GO:0010050	vegetative phase change	50/6869	62/13277	2.13013e-06	1.70301e-05	1.15773e-05	50
GO:0000910	cytokinesis	131/6869	192/13277	2.21441e-06	1.75251e-05	1.19138e-05	131
GO:0061640	cytoskeleton-dependent cytokinesis	131/6869	192/13277	2.21441e-06	1.75251e-05	1.19138e-05	131
GO:0051301	cell division	194/6869	299/13277	2.31847e-06	1.82565e-05	1.24109e-05	194
GO:0006546	glycine catabolic process	39/6869	46/13277	2.65295e-06	2.07859e-05	1.41304e-05	39
GO:0072593	reactive oxygen species metabolic process	211/6869	329/13277	2.88286e-06	2.24748e-05	1.52786e-05	211
GO:0030029	actin filament-based process	125/6869	183/13277	3.43397e-06	2.66388e-05	1.81093e-05	125
GO:0055080	cation homeostasis	145/6869	217/13277	4.0704e-06	3.14203e-05	2.13598e-05	145
GO:0006766	vitamin metabolic process	67/6869	89/13277	4.15261e-06	3.18977e-05	2.16844e-05	67
GO:0040008	regulation of growth	163/6869	248/13277	4.78135e-06	3.64502e-05	2.47793e-05	163
GO:0009071	serine family amino acid catabolic process	40/6869	48/13277	4.7918e-06	3.64502e-05	2.47793e-05	40
GO:0033865	nucleoside bisphosphate metabolic process	61/6869	80/13277	5.44142e-06	4.06482e-05	2.7633e-05	61
GO:0033875	ribonucleoside bisphosphate metabolic process	61/6869	80/13277	5.44142e-06	4.06482e-05	2.7633e-05	61
GO:0034032	purine nucleoside bisphosphate metabolic process	61/6869	80/13277	5.44142e-06	4.06482e-05	2.7633e-05	61
GO:0009790	embryo development	297/6869	482/13277	5.44742e-06	4.06482e-05	2.7633e-05	297
GO:0009793	embryo development ending in seed dormancy	290/6869	471/13277	7.66022e-06	5.6889e-05	3.86737e-05	290
GO:0000911	cytokinesis by cell plate formation	125/6869	185/13277	8.01395e-06	5.86816e-05	3.98924e-05	125
GO:0032506	cytokinetic process	125/6869	185/13277	8.01395e-06	5.86816e-05	3.98924e-05	125
GO:1902410	mitotic cytokinetic process	125/6869	185/13277	8.01395e-06	5.86816e-05	3.98924e-05	125
GO:0042743	hydrogen peroxide metabolic process	190/6869	296/13277	8.18202e-06	5.96336e-05	4.05396e-05	190
GO:0006637	acyl-CoA metabolic process	58/6869	76/13277	8.8243e-06	6.3722e-05	4.33189e-05	58
GO:0035383	thioester metabolic process	58/6869	76/13277	8.8243e-06	6.3722e-05	4.33189e-05	58
GO:1902903	regulation of supramolecular fiber organization	75/6869	103/13277	9.37402e-06	6.73812e-05	4.58064e-05	75
GO:0045934	negative regulation of nucleobase-containing compound metabolic process	219/6869	347/13277	9.76287e-06	6.98558e-05	4.74887e-05	219
GO:0019216	regulation of lipid metabolic process	34/6869	40/13277	1.06637e-05	7.59546e-05	5.16347e-05	34
GO:0050801	ion homeostasis	155/6869	237/13277	1.22659e-05	8.6971e-05	5.91238e-05	155
GO:0016246	RNA interference	110/6869	161/13277	1.27964e-05	9.03244e-05	6.14035e-05	110
GO:0008361	regulation of cell size	40/6869	49/13277	1.3025e-05	9.15255e-05	6.222e-05	40
GO:0006346	methylation-dependent chromatin silencing	74/6869	102/13277	1.33399e-05	9.29051e-05	6.31579e-05	74
GO:0043254	regulation of protein complex assembly	74/6869	102/13277	1.33399e-05	9.29051e-05	6.31579e-05	74
GO:0000278	mitotic cell cycle	228/6869	364/13277	1.38192e-05	9.5322e-05	6.48009e-05	228
GO:0010558	negative regulation of macromolecule biosynthetic process	216/6869	343/13277	1.38694e-05	9.5322e-05	6.48009e-05	216
GO:2000113	negative regulation of cellular macromolecule biosynthetic process	216/6869	343/13277	1.38694e-05	9.5322e-05	6.48009e-05	216
GO:0006066	alcohol metabolic process	105/6869	153/13277	1.47953e-05	0.000101241	6.8825e-05	105
GO:0009890	negative regulation of biosynthetic process	222/6869	354/13277	1.59199e-05	0.000108463	7.37341e-05	222
GO:0034220	ion transmembrane transport	109/6869	160/13277	1.71012e-05	0.000116	7.88578e-05	109
GO:0006260	DNA replication	162/6869	250/13277	1.71742e-05	0.000116	7.88578e-05	162
GO:0031327	negative regulation of cellular biosynthetic process	220/6869	351/13277	1.82795e-05	0.000122935	8.35727e-05	220
GO:0019725	cellular homeostasis	142/6869	216/13277	1.88171e-05	0.000125159	8.50843e-05	142
GO:0032271	regulation of protein polymerization	73/6869	101/13277	1.89178e-05	0.000125159	8.50843e-05	73
GO:0007015	actin filament organization	92/6869	132/13277	1.89204e-05	0.000125159	8.50843e-05	92
GO:0055082	cellular chemical homeostasis	132/6869	199/13277	1.89296e-05	0.000125159	8.50843e-05	132
GO:0006275	regulation of DNA replication	81/6869	114/13277	1.92288e-05	0.000126603	8.6066e-05	81
GO:0000272	polysaccharide catabolic process	37/6869	45/13277	2.02747e-05	0.000132931	9.03677e-05	37
GO:0030003	cellular cation homeostasis	123/6869	184/13277	2.07595e-05	0.000135542	9.21431e-05	123
GO:0006873	cellular ion homeostasis	127/6869	191/13277	2.26974e-05	0.00014758	0.000100326	127
GO:0043647	inositol phosphate metabolic process	59/6869	79/13277	2.35669e-05	0.0001526	0.000103739	59
GO:0009411	response to UV	135/6869	205/13277	2.63607e-05	0.000169988	0.00011556	135
GO:0046173	polyol biosynthetic process	48/6869	62/13277	2.70306e-05	0.000173594	0.000118011	48
GO:0051253	negative regulation of RNA metabolic process	210/6869	335/13277	2.77545e-05	0.000177515	0.000120677	210
GO:0016441	posttranscriptional gene silencing	119/6869	178/13277	2.79317e-05	0.000177923	0.000120954	119
GO:0001505	regulation of neurotransmitter levels	46/6869	59/13277	2.87931e-05	0.000180742	0.000122871	46
GO:0032958	inositol phosphate biosynthetic process	46/6869	59/13277	2.87931e-05	0.000180742	0.000122871	46
GO:0042133	neurotransmitter metabolic process	46/6869	59/13277	2.87931e-05	0.000180742	0.000122871	46
GO:0051493	regulation of cytoskeleton organization	75/6869	105/13277	2.88357e-05	0.000180742	0.000122871	75
GO:0009106	lipoate metabolic process	32/6869	38/13277	2.91191e-05	0.000181792	0.000123584	32
GO:0006342	chromatin silencing	140/6869	214/13277	3.10711e-05	0.000193208	0.000131345	140
GO:0035821	modification of morphology or physiology of other organism	73/6869	102/13277	3.29587e-05	0.000202535	0.000137685	73
GO:0044003	modification by symbiont of host morphology or physiology	73/6869	102/13277	3.29587e-05	0.000202535	0.000137685	73
GO:0051817	modification of morphology or physiology of other organism involved in symbiotic interaction	73/6869	102/13277	3.29587e-05	0.000202535	0.000137685	73
GO:0016129	phytosteroid biosynthetic process	63/6869	86/13277	3.52182e-05	0.000214735	0.000145979	63
GO:0016132	brassinosteroid biosynthetic process	63/6869	86/13277	3.52182e-05	0.000214735	0.000145979	63
GO:0022402	cell cycle process	293/6869	483/13277	3.59673e-05	0.000218452	0.000148506	293
GO:0008356	asymmetric cell division	19/6869	20/13277	3.67063e-05	0.000221736	0.000150739	19
GO:0035194	posttranscriptional gene silencing by RNA	115/6869	172/13277	3.75904e-05	0.000221736	0.000150739	115
GO:0008064	regulation of actin polymerization or depolymerization	71/6869	99/13277	3.764e-05	0.000221736	0.000150739	71
GO:0030832	regulation of actin filament length	71/6869	99/13277	3.764e-05	0.000221736	0.000150739	71
GO:0030833	regulation of actin filament polymerization	71/6869	99/13277	3.764e-05	0.000221736	0.000150739	71
GO:0032956	regulation of actin cytoskeleton organization	71/6869	99/13277	3.764e-05	0.000221736	0.000150739	71
GO:0032970	regulation of actin filament-based process	71/6869	99/13277	3.764e-05	0.000221736	0.000150739	71
GO:0110053	regulation of actin filament organization	71/6869	99/13277	3.764e-05	0.000221736	0.000150739	71
GO:0030036	actin cytoskeleton organization	94/6869	137/13277	4.13126e-05	0.00024246	0.000164827	94
GO:0010264	myo-inositol hexakisphosphate biosynthetic process	45/6869	58/13277	4.38472e-05	0.000255422	0.000173639	45
GO:0033517	myo-inositol hexakisphosphate metabolic process	45/6869	58/13277	4.38472e-05	0.000255422	0.000173639	45
GO:0030041	actin filament polymerization	72/6869	101/13277	4.61361e-05	0.00026776	0.000182026	72
GO:1901617	organic hydroxy compound biosynthetic process	281/6869	463/13277	4.92242e-05	0.000284628	0.000193493	281
GO:0042335	cuticle development	33/6869	40/13277	5.06355e-05	0.000291713	0.000198309	33
GO:0051701	interaction with host	78/6869	111/13277	5.10515e-05	0.000293032	0.000199206	78
GO:0045892	negative regulation of transcription, DNA-templated	205/6869	329/13277	5.85132e-05	0.000332211	0.00022584	205
GO:1902679	negative regulation of RNA biosynthetic process	205/6869	329/13277	5.85132e-05	0.000332211	0.00022584	205
GO:1903507	negative regulation of nucleic acid-templated transcription	205/6869	329/13277	5.85132e-05	0.000332211	0.00022584	205
GO:0009765	photosynthesis, light harvesting	18/6869	19/13277	6.76627e-05	0.000382771	0.000260212	18
GO:0042254	ribosome biogenesis	183/6869	291/13277	6.86853e-05	0.000387158	0.000263194	183
GO:0042744	hydrogen peroxide catabolic process	51/6869	68/13277	6.9223e-05	0.00038879	0.000264303	51
GO:0006281	DNA repair	138/6869	213/13277	7.11337e-05	0.000398095	0.000270629	138
GO:0048878	chemical homeostasis	172/6869	272/13277	7.30045e-05	0.00040711	0.000276758	172
GO:0051495	positive regulation of cytoskeleton organization	69/6869	97/13277	7.37896e-05	0.00040858	0.000277757	69
GO:1902905	positive regulation of supramolecular fiber organization	69/6869	97/13277	7.37896e-05	0.00040858	0.000277757	69
GO:0006544	glycine metabolic process	40/6869	51/13277	7.54491e-05	0.000416298	0.000283004	40
GO:0016128	phytosteroid metabolic process	64/6869	89/13277	7.87505e-05	0.000431476	0.000293322	64
GO:0016131	brassinosteroid metabolic process	64/6869	89/13277	7.87505e-05	0.000431476	0.000293322	64
GO:0051225	spindle assembly	32/6869	39/13277	8.15093e-05	0.000445035	0.00030254	32
GO:0045814	negative regulation of gene expression, epigenetic	140/6869	217/13277	8.53499e-05	0.000464386	0.000315695	140
GO:0060429	epithelium development	23/6869	26/13277	8.63969e-05	0.000468457	0.000318462	23
GO:0006261	DNA-dependent DNA replication	133/6869	205/13277	8.68323e-05	0.000469194	0.000318963	133
GO:0051187	cofactor catabolic process	88/6869	129/13277	9.97836e-05	0.000537323	0.000365278	88
GO:0009799	specification of symmetry	68/6869	96/13277	0.000102723	0.000549375	0.000373471	68
GO:0031334	positive regulation of protein complex assembly	68/6869	96/13277	0.000102723	0.000549375	0.000373471	68
GO:0046474	glycerophospholipid biosynthetic process	101/6869	151/13277	0.000106538	0.00056784	0.000386024	101
GO:0046165	alcohol biosynthetic process	71/6869	101/13277	0.000107434	0.000570674	0.00038795	71
GO:0006270	DNA replication initiation	41/6869	53/13277	0.000108197	0.000572786	0.000389386	41
GO:0007051	spindle organization	33/6869	41/13277	0.000130368	0.000687835	0.000467597	33
GO:0017001	antibiotic catabolic process	51/6869	69/13277	0.000132232	0.00069069	0.000469539	51
GO:0071478	cellular response to radiation	51/6869	69/13277	0.000132232	0.00069069	0.000469539	51
GO:0071482	cellular response to light stimulus	51/6869	69/13277	0.000132232	0.00069069	0.000469539	51
GO:0009855	determination of bilateral symmetry	67/6869	95/13277	0.000142437	0.000739071	0.000502428	67
GO:0032273	positive regulation of protein polymerization	67/6869	95/13277	0.000142437	0.000739071	0.000502428	67
GO:0010109	regulation of photosynthesis	22/6869	25/13277	0.000148812	0.000769597	0.00052318	22
GO:0051726	regulation of cell cycle	156/6869	247/13277	0.000168934	0.000870461	0.000591749	156
GO:0006650	glycerophospholipid metabolic process	105/6869	159/13277	0.000169426	0.000870461	0.000591749	105
GO:0044089	positive regulation of cellular component biogenesis	68/6869	97/13277	0.000170567	0.000873458	0.000593786	68
GO:0030422	production of siRNA involved in RNA interference	86/6869	127/13277	0.000177419	0.000905589	0.000615629	86
GO:0030838	positive regulation of actin filament polymerization	66/6869	94/13277	0.00019671	0.000997555	0.000678149	66
GO:0045010	actin nucleation	66/6869	94/13277	0.00019671	0.000997555	0.000678149	66
GO:0045786	negative regulation of cell cycle	34/6869	43/13277	0.000197924	0.00100048	0.000680134	34
GO:0008154	actin polymerization or depolymerization	72/6869	104/13277	0.000206624	0.00104109	0.000707747	72
GO:0022613	ribonucleoprotein complex biogenesis	184/6869	297/13277	0.000213149	0.00107053	0.000727757	184
GO:0007155	cell adhesion	61/6869	86/13277	0.000216716	0.00108151	0.000735222	61
GO:0022610	biological adhesion	61/6869	86/13277	0.000216716	0.00108151	0.000735222	61
GO:0031050	dsRNA processing	88/6869	131/13277	0.000230548	0.00114325	0.000777196	88
GO:0070918	production of small RNA involved in gene silencing by RNA	88/6869	131/13277	0.000230548	0.00114325	0.000777196	88
GO:0044087	regulation of cellular component biogenesis	76/6869	111/13277	0.000242583	0.00119914	0.000815187	76
GO:0045017	glycerolipid biosynthetic process	109/6869	167/13277	0.000257438	0.00126857	0.000862386	109
GO:0044403	symbiont process	83/6869	123/13277	0.000273343	0.00134272	0.000912798	83
GO:0055085	transmembrane transport	194/6869	316/13277	0.000295164	0.00144538	0.000982587	194
GO:0033043	regulation of organelle organization	137/6869	216/13277	0.000313242	0.00152913	0.00103952	137
GO:0007267	cell-cell signaling	50/6869	69/13277	0.000346657	0.00168699	0.00114684	50
GO:0009615	response to virus	106/6869	163/13277	0.000381756	0.00185205	0.00125904	106
GO:0010051	xylem and phloem pattern formation	56/6869	79/13277	0.000399053	0.00192999	0.00131203	56
GO:0003002	regionalization	118/6869	184/13277	0.000422863	0.00203885	0.00138603	118
GO:0008544	epidermis development	20/6869	23/13277	0.000435063	0.00207849	0.00141298	20
GO:0009913	epidermal cell differentiation	20/6869	23/13277	0.000435063	0.00207849	0.00141298	20
GO:0030855	epithelial cell differentiation	20/6869	23/13277	0.000435063	0.00207849	0.00141298	20
GO:0051567	histone H3-K9 methylation	104/6869	160/13277	0.000442631	0.00210183	0.00142884	104
GO:0061647	histone H3-K9 modification	104/6869	160/13277	0.000442631	0.00210183	0.00142884	104
GO:0046486	glycerolipid metabolic process	115/6869	179/13277	0.000448972	0.0021255	0.00144493	115
GO:0071555	cell wall organization	214/6869	354/13277	0.000508989	0.00240237	0.00163315	214
GO:0035196	production of miRNAs involved in gene silencing by miRNA	79/6869	118/13277	0.000553693	0.00260552	0.00177126	79
GO:0009073	aromatic amino acid family biosynthetic process	64/6869	93/13277	0.000591155	0.00277347	0.00188544	64
GO:0043572	plastid fission	17/6869	19/13277	0.000606744	0.00283811	0.00192938	17
GO:0032879	regulation of localization	115/6869	180/13277	0.000614471	0.0028657	0.00194814	115
GO:0042180	cellular ketone metabolic process	101/6869	156/13277	0.000653855	0.00304033	0.00206685	101
GO:0016126	sterol biosynthetic process	88/6869	134/13277	0.000724211	0.00335751	0.00228247	88
GO:0018198	peptidyl-cysteine modification	14/6869	15/13277	0.000759312	0.00349953	0.00237902	14
GO:0042548	regulation of photosynthesis, light reaction	14/6869	15/13277	0.000759312	0.00349953	0.00237902	14
GO:0016125	sterol metabolic process	92/6869	141/13277	0.000765196	0.00351631	0.00239043	92
GO:0001708	cell fate specification	29/6869	37/13277	0.000770176	0.00352641	0.00239729	29
GO:0042592	homeostatic process	209/6869	347/13277	0.000771895	0.00352641	0.00239729	209
GO:0007167	enzyme linked receptor protein signaling pathway	69/6869	102/13277	0.000782662	0.00355487	0.00241664	69
GO:0007169	transmembrane receptor protein tyrosine kinase signaling pathway	69/6869	102/13277	0.000782662	0.00355487	0.00241664	69
GO:0006325	chromatin organization	277/6869	470/13277	0.000837003	0.0037907	0.00257696	277
GO:0044419	interspecies interaction between organisms	83/6869	126/13277	0.000879079	0.00396979	0.0026987	83
GO:0006816	calcium ion transport	70/6869	104/13277	0.00089288	0.00402053	0.0027332	70
GO:0000038	very long-chain fatty acid metabolic process	32/6869	42/13277	0.000996393	0.00447377	0.00304132	32
GO:0031048	chromatin silencing by small RNA	68/6869	101/13277	0.0010389	0.0046513	0.003162	68
GO:0010020	chloroplast fission	16/6869	18/13277	0.00105762	0.00470821	0.00320069	16
GO:0046890	regulation of lipid biosynthetic process	16/6869	18/13277	0.00105762	0.00470821	0.00320069	16
GO:0006974	cellular response to DNA damage stimulus	156/6869	254/13277	0.00107578	0.00477551	0.00324644	156
GO:0044770	cell cycle phase transition	43/6869	60/13277	0.00129152	0.00570088	0.00387552	43
GO:0044772	mitotic cell cycle phase transition	43/6869	60/13277	0.00129152	0.00570088	0.00387552	43
GO:0070925	organelle assembly	33/6869	44/13277	0.00133666	0.00588354	0.0039997	33
GO:0032544	plastid translation	10/6869	10/13277	0.0013695	0.00599442	0.00407507	10
GO:1901879	regulation of protein depolymerization	10/6869	10/13277	0.0013695	0.00599442	0.00407507	10
GO:0017014	protein nitrosylation	13/6869	14/13277	0.0013775	0.00599597	0.00407612	13
GO:0018119	peptidyl-cysteine S-nitrosylation	13/6869	14/13277	0.0013775	0.00599597	0.00407612	13
GO:0010638	positive regulation of organelle organization	89/6869	138/13277	0.00158822	0.00689401	0.00468662	89
GO:0035195	gene silencing by miRNA	82/6869	126/13277	0.00161584	0.00699454	0.00475496	82
GO:0071368	cellular response to cytokinin stimulus	39/6869	54/13277	0.00169942	0.00733608	0.00498715	39
GO:0016999	antibiotic metabolic process	241/6869	409/13277	0.00178947	0.00770355	0.00523696	241
GO:0007166	cell surface receptor signaling pathway	70/6869	106/13277	0.00195283	0.0083838	0.0056994	70
GO:0048443	stamen development	78/6869	120/13277	0.00218126	0.00931345	0.00633138	78
GO:0048466	androecium development	78/6869	120/13277	0.00218126	0.00931345	0.00633138	78
GO:0051130	positive regulation of cellular component organization	89/6869	139/13277	0.00219115	0.00933024	0.0063428	89

## Sheet: GO_MF_Leaf3h_Leaf0h.UP
ID	Description	GeneRatio	BgRatio	pvalue	p.adjust	qvalue	Count
GO:0003735	structural constituent of ribosome	162/6194	211/12626	8.39116e-17	3.82637e-14	3.70978e-14	162
GO:0005198	structural molecule activity	182/6194	272/12626	1.41375e-09	3.22336e-07	3.12514e-07	182

## Sheet: GO_MF_Leaf3h_Leaf0h.DW
L	Description	GeneRatio	BgRatio	pvalue	p.adjust	qvalue	Count
GO:0015631	tubulin binding	36/6432	43/12626	7.51063e-06	0.00343987	0.00311494	36

## Sheet: GO_CC_Leaf3h_Leaf0h.UP
ID	Description	GeneRatio	BgRatio	pvalue	p.adjust	qvalue	Count
GO:0044391	ribosomal subunit	137/7306	155/15203	1.92318e-26	4.2887e-24	3.01636e-24	137
GO:0005730	nucleolus	188/7306	245/15203	2.02987e-20	1.76875e-18	1.24401e-18	188
GO:0022626	cytosolic ribosome	152/7306	189/15203	2.78148e-20	1.76875e-18	1.24401e-18	152
GO:0022625	cytosolic large ribosomal subunit	70/7306	72/15203	3.17265e-20	1.76875e-18	1.24401e-18	70
GO:0044445	cytosolic part	156/7306	200/15203	2.27467e-18	1.0145e-16	7.13528e-17	156
GO:0015934	large ribosomal subunit	82/7306	92/15203	7.69284e-17	2.85917e-15	2.01094e-15	82
GO:0005783	endoplasmic reticulum	309/7306	464/15203	2.27164e-16	7.23678e-15	5.08983e-15	309
GO:1990904	ribonucleoprotein complex	225/7306	321/15203	5.51773e-16	1.53807e-14	1.08177e-14	225
GO:0031974	membrane-enclosed lumen	290/7306	437/15203	3.87264e-15	7.85089e-14	5.52175e-14	290
GO:0043233	organelle lumen	290/7306	437/15203	3.87264e-15	7.85089e-14	5.52175e-14	290
GO:0070013	intracellular organelle lumen	290/7306	437/15203	3.87264e-15	7.85089e-14	5.52175e-14	290
GO:0005840	ribosome	188/7306	267/15203	7.07593e-14	1.31494e-12	9.24836e-13	188
GO:0031981	nuclear lumen	254/7306	387/15203	1.29882e-12	2.22798e-11	1.567e-11	254
GO:0044428	nuclear part	312/7306	494/15203	4.94478e-12	7.87633e-11	5.53964e-11	312
GO:0022627	cytosolic small ribosomal subunit	49/7306	54/15203	3.12429e-11	4.64478e-10	3.2668e-10	49
GO:0015935	small ribosomal subunit	55/7306	63/15203	6.82655e-11	9.5145e-10	6.69181e-10	55
GO:0000502	proteasome complex	38/7306	40/15203	1.70036e-10	1.99569e-09	1.40362e-09	38
GO:1905368	peptidase complex	38/7306	40/15203	1.70036e-10	1.99569e-09	1.40362e-09	38
GO:1905369	endopeptidase complex	38/7306	40/15203	1.70036e-10	1.99569e-09	1.40362e-09	38
GO:0031410	cytoplasmic vesicle	192/7306	290/15203	2.41088e-10	2.56012e-09	1.80061e-09	192
GO:0097708	intracellular vesicle	192/7306	290/15203	2.41088e-10	2.56012e-09	1.80061e-09	192
GO:0005768	endosome	173/7306	257/15203	2.58344e-10	2.61867e-09	1.84178e-09	173
GO:0031982	vesicle	195/7306	297/15203	5.0979e-10	4.94274e-09	3.47637e-09	195
GO:0098791	Golgi subcompartment	158/7306	235/15203	1.75203e-09	1.61357e-08	1.13487e-08	158
GO:0044431	Golgi apparatus part	166/7306	249/15203	1.80893e-09	1.61357e-08	1.13487e-08	166
GO:0044437	vacuolar part	258/7306	419/15203	1.19893e-08	1.02831e-07	7.2324e-08	258
GO:0005774	vacuolar membrane	255/7306	415/15203	1.91488e-08	1.58155e-07	1.11235e-07	255
GO:0005802	trans-Golgi network	140/7306	210/15203	3.31959e-08	2.64381e-07	1.85947e-07	140
GO:0005838	proteasome regulatory particle	20/7306	20/15203	4.25729e-07	3.16458e-06	2.22574e-06	20
GO:0022624	proteasome accessory complex	20/7306	20/15203	4.25729e-07	3.16458e-06	2.22574e-06	20
GO:0005839	proteasome core complex	17/7306	17/15203	3.85081e-06	2.7701e-05	1.94829e-05	17
GO:0044429	mitochondrial part	140/7306	223/15203	5.94535e-06	4.14317e-05	2.91401e-05	140
GO:0005732	small nucleolar ribonucleoprotein complex	19/7306	21/15203	5.5241e-05	0.000373295	0.000262549	19
GO:0044432	endoplasmic reticulum part	42/7306	57/15203	7.2367e-05	0.000474643	0.000333829	42
GO:0031966	mitochondrial membrane	113/7306	184/15203	0.000170514	0.00108642	0.000764108	113
GO:0005740	mitochondrial envelope	117/7306	192/15203	0.000208419	0.00128429	0.000903278	117
GO:0042175	nuclear outer membrane-endoplasmic reticulum membrane network	38/7306	52/15203	0.000213089	0.00128429	0.000903278	38
GO:0005789	endoplasmic reticulum membrane	36/7306	50/15203	0.000502672	0.00287425	0.00202154	36
GO:0098827	endoplasmic reticulum subcompartment	36/7306	50/15203	0.000502672	0.00287425	0.00202154	36
GO:0008540	proteasome regulatory particle, base subcomplex	10/7306	10/15203	0.000654807	0.00365055	0.00256753	10
GO:0005743	mitochondrial inner membrane	98/7306	163/15203	0.00124118	0.00675082	0.00474804	98

## Sheet: GO_CC_Leaf3h_Leaf0h.DW
ID	Description	GeneRatio	BgRatio	pvalue	p.adjust	qvalue	Count
GO:0009579	thylakoid	385/7897	437/15203	3.61135e-60	8.08943e-58	6.72852e-58	385
GO:0009534	chloroplast thylakoid	329/7897	369/15203	2.85141e-54	2.12905e-52	1.77087e-52	329
GO:0031976	plastid thylakoid	329/7897	369/15203	2.85141e-54	2.12905e-52	1.77087e-52	329
GO:0044436	thylakoid part	289/7897	326/15203	1.48308e-46	8.30526e-45	6.90804e-45	289
GO:0034357	photosynthetic membrane	259/7897	289/15203	7.41492e-44	3.32188e-42	2.76303e-42	259
GO:0042651	thylakoid membrane	258/7897	288/15203	1.29817e-43	4.8465e-42	4.03116e-42	258
GO:0055035	plastid thylakoid membrane	249/7897	276/15203	1.89374e-43	6.05997e-42	5.04048e-42	249
GO:0009535	chloroplast thylakoid membrane	247/7897	274/15203	5.87426e-43	1.64479e-41	1.36809e-41	247
GO:0031977	thylakoid lumen	74/7897	82/15203	8.94407e-14	2.22608e-12	1.85158e-12	74
GO:0010287	plastoglobule	50/7897	53/15203	1.55243e-11	3.47745e-10	2.89243e-10	50
GO:0009543	chloroplast thylakoid lumen	61/7897	68/15203	2.6557e-11	4.95731e-10	4.12333e-10	61
GO:0031978	plastid thylakoid lumen	61/7897	68/15203	2.6557e-11	4.95731e-10	4.12333e-10	61
GO:0009521	photosystem	33/7897	33/15203	3.96826e-10	6.83762e-09	5.68731e-09	33
GO:0009295	nucleoid	34/7897	36/15203	3.1966e-08	5.11456e-07	4.25412e-07	34
GO:0031969	chloroplast membrane	61/7897	77/15203	6.36096e-07	9.49903e-06	7.90098e-06	61
GO:0042646	plastid nucleoid	25/7897	26/15203	9.89585e-07	1.38542e-05	1.15235e-05	25
GO:0042170	plastid membrane	67/7897	87/15203	1.21576e-06	1.60194e-05	1.33244e-05	67
GO:0009523	photosystem II	20/7897	20/15203	2.02129e-06	2.51539e-05	2.09221e-05	20
GO:0098807	chloroplast thylakoid membrane protein complex	23/7897	25/15203	2.14468e-05	0.000252846	0.000210309	23
GO:0030095	chloroplast photosystem II	16/7897	16/15203	2.78837e-05	0.000312298	0.000259759	16
GO:0009527	plastid outer membrane	27/7897	31/15203	4.04478e-05	0.000431444	0.000358861	27
GO:0009528	plastid inner membrane	39/7897	49/15203	5.72855e-05	0.000567151	0.000471738	39
GO:0009706	chloroplast inner membrane	37/7897	46/15203	5.82343e-05	0.000567151	0.000471738	37
GO:0009522	photosystem I	13/7897	13/15203	0.000199464	0.00186166	0.00154847	13
GO:0010319	stromule	26/7897	31/15203	0.000213283	0.00191102	0.00158952	26
GO:0000229	cytoplasmic chromosome	16/7897	17/15203	0.000242508	0.00201192	0.00167345	16
GO:0009508	plastid chromosome	16/7897	17/15203	0.000242508	0.00201192	0.00167345	16
GO:0009707	chloroplast outer membrane	23/7897	27/15203	0.000320074	0.00256059	0.00212981	23
GO:0048046	apoplast	150/7897	243/15203	0.0012318	0.00951458	0.00791392	150
GO:0005694	chromosome	75/7897	113/15203	0.00128702	0.00955867	0.00795058	75
GO:0030076	light-harvesting complex	18/7897	21/15203	0.00132285	0.00955867	0.00795058	18
GO:0010598	NAD(P)H dehydrogenase complex (plastoquinone)	10/7897	10/15203	0.00142606	0.00998243	0.00830306	10

## Sheet: GO_BP_Protoplast_Leaf0h.UP
ID	Description	GeneRatio	BgRatio	pvalue	p.adjust	qvalue	Count
GO:0016192	vesicle-mediated transport	344/6564	443/13277	2.47568e-35	3.87691e-32	3.16887e-32	344
GO:0048193	Golgi vesicle transport	232/6564	286/13277	3.55481e-29	2.78342e-26	2.27508e-26	232
GO:0035966	response to topologically incorrect protein	261/6564	333/13277	3.68724e-28	1.92474e-25	1.57322e-25	261
GO:0001510	RNA methylation	128/6564	140/13277	9.18955e-27	3.59771e-24	2.94066e-24	128
GO:0080129	proteasome core complex assembly	108/6564	116/13277	1.80729e-24	5.66042e-22	4.62665e-22	108
GO:0043248	proteasome assembly	139/6564	161/13277	4.41915e-23	9.88627e-21	8.08073e-21	139
GO:0051788	response to misfolded protein	139/6564	161/13277	4.41915e-23	9.88627e-21	8.08073e-21	139
GO:0034976	response to endoplasmic reticulum stress	239/6564	320/13277	9.10885e-21	1.78306e-18	1.45742e-18	239
GO:0009636	response to toxic substance	270/6564	371/13277	1.49456e-20	2.60053e-18	2.1256e-18	270
GO:0006626	protein targeting to mitochondrion	88/6564	96/13277	5.79884e-19	7.56749e-17	6.18543e-17	88
GO:0070585	protein localization to mitochondrion	88/6564	96/13277	5.79884e-19	7.56749e-17	6.18543e-17	88
GO:0072655	establishment of protein localization to mitochondrion	88/6564	96/13277	5.79884e-19	7.56749e-17	6.18543e-17	88
GO:0006839	mitochondrial transport	112/6564	132/13277	1.30916e-17	1.57703e-15	1.28902e-15	112
GO:0019941	modification-dependent protein catabolic process	198/6564	266/13277	3.81032e-17	3.97797e-15	3.25147e-15	198
GO:0043632	modification-dependent macromolecule catabolic process	198/6564	266/13277	3.81032e-17	3.97797e-15	3.25147e-15	198
GO:0006511	ubiquitin-dependent protein catabolic process	196/6564	264/13277	8.84914e-17	8.6611e-15	7.07931e-15	196
GO:0033365	protein localization to organelle	303/6564	443/13277	1.76575e-16	1.62657e-14	1.3295e-14	303
GO:0007005	mitochondrion organization	96/6564	111/13277	1.90864e-16	1.66052e-14	1.35726e-14	96
GO:0006623	protein targeting to vacuole	97/6564	113/13277	3.92798e-16	2.92915e-14	2.3942e-14	97
GO:0072665	protein localization to vacuole	97/6564	113/13277	3.92798e-16	2.92915e-14	2.3942e-14	97
GO:0072666	establishment of protein localization to vacuole	97/6564	113/13277	3.92798e-16	2.92915e-14	2.3942e-14	97
GO:0072594	establishment of protein localization to organelle	297/6564	435/13277	5.15889e-16	3.67219e-14	3.00153e-14	297
GO:0007034	vacuolar transport	103/6564	123/13277	1.73916e-15	1.18414e-13	9.67882e-14	103
GO:0010038	response to metal ion	328/6564	497/13277	2.41319e-14	1.57461e-12	1.28704e-12	328
GO:0051603	proteolysis involved in cellular protein catabolic process	234/6564	337/13277	4.02699e-14	2.52251e-12	2.06182e-12	234
GO:0006865	amino acid transport	163/6564	221/13277	9.41717e-14	5.67203e-12	4.63614e-12	163
GO:0009853	photorespiration	116/6564	147/13277	1.33812e-13	7.76108e-12	6.34367e-12	116
GO:0046686	response to cadmium ion	277/6564	414/13277	2.32559e-13	1.30067e-11	1.06313e-11	277
GO:0009407	toxin catabolic process	137/6564	181/13277	3.17327e-13	1.71356e-11	1.40062e-11	137
GO:0006518	peptide metabolic process	253/6564	374/13277	4.05035e-13	2.11428e-11	1.72815e-11	253
GO:0006888	ER to Golgi vesicle-mediated transport	73/6564	84/13277	4.79044e-13	2.37166e-11	1.93852e-11	73
GO:0006412	translation	244/6564	359/13277	4.8463e-13	2.37166e-11	1.93852e-11	244
GO:0098754	detoxification	144/6564	193/13277	5.69041e-13	2.70036e-11	2.20719e-11	144
GO:0043094	cellular metabolic compound salvage	127/6564	166/13277	6.01365e-13	2.76982e-11	2.26396e-11	127
GO:0043043	peptide biosynthetic process	246/6564	363/13277	6.36533e-13	2.84803e-11	2.32789e-11	246
GO:0043604	amide biosynthetic process	262/6564	392/13277	1.2623e-12	5.491e-11	4.48817e-11	262
GO:0009404	toxin metabolic process	142/6564	191/13277	1.32184e-12	5.59461e-11	4.57286e-11	142
GO:0006820	anion transport	291/6564	443/13277	1.6994e-12	7.00332e-11	5.7243e-11	291
GO:1901293	nucleoside phosphate biosynthetic process	280/6564	424/13277	1.80214e-12	7.23627e-11	5.9147e-11	280
GO:0009165	nucleotide biosynthetic process	279/6564	423/13277	2.44236e-12	9.56185e-11	7.81556e-11	279
GO:0015849	organic acid transport	172/6564	242/13277	4.43159e-12	1.65235e-10	1.35058e-10	172
GO:0046942	carboxylic acid transport	172/6564	242/13277	4.43159e-12	1.65235e-10	1.35058e-10	172
GO:0009408	response to heat	180/6564	256/13277	6.48985e-12	2.36351e-10	1.93186e-10	180
GO:0015711	organic anion transport	181/6564	260/13277	2.24097e-11	7.9758e-10	6.51917e-10	181
GO:0043161	proteasome-mediated ubiquitin-dependent protein catabolic process	84/6564	105/13277	8.6565e-11	3.01246e-09	2.46229e-09	84
GO:0006498	N-terminal protein lipidation	100/6564	131/13277	2.17849e-10	7.25853e-09	5.9329e-09	100
GO:0006499	N-terminal protein myristoylation	100/6564	131/13277	2.17849e-10	7.25853e-09	5.9329e-09	100
GO:0005996	monosaccharide metabolic process	198/6564	294/13277	2.68554e-10	8.76159e-09	7.16145e-09	198
GO:0018377	protein myristoylation	101/6564	133/13277	2.9849e-10	9.3733e-09	7.66145e-09	101
GO:0006006	glucose metabolic process	159/6564	228/13277	2.99275e-10	9.3733e-09	7.66145e-09	159
GO:0044257	cellular protein catabolic process	238/6564	364/13277	3.64237e-10	1.11842e-08	9.14164e-09	238
GO:0031365	N-terminal protein amino acid modification	102/6564	135/13277	4.04606e-10	1.21849e-08	9.95953e-09	102
GO:0006457	protein folding	168/6564	246/13277	1.21452e-09	3.58856e-08	2.93318e-08	168
GO:0030163	protein catabolic process	241/6564	373/13277	1.52097e-09	4.4108e-08	3.60525e-08	241
GO:0009062	fatty acid catabolic process	132/6564	187/13277	2.80147e-09	7.6594e-08	6.26056e-08	132
GO:0006497	protein lipidation	104/6564	141/13277	2.83681e-09	7.6594e-08	6.26056e-08	104
GO:0042157	lipoprotein metabolic process	104/6564	141/13277	2.83681e-09	7.6594e-08	6.26056e-08	104
GO:0042158	lipoprotein biosynthetic process	104/6564	141/13277	2.83681e-09	7.6594e-08	6.26056e-08	104
GO:0006635	fatty acid beta-oxidation	111/6564	153/13277	4.18351e-09	1.1104e-07	9.0761e-08	111
GO:0009260	ribonucleotide biosynthetic process	216/6564	332/13277	4.51309e-09	1.15861e-07	9.47008e-08	216
GO:0046390	ribose phosphate biosynthetic process	216/6564	332/13277	4.51309e-09	1.15861e-07	9.47008e-08	216
GO:0042542	response to hydrogen peroxide	120/6564	168/13277	4.70343e-09	1.188e-07	9.71031e-08	120
GO:0006979	response to oxidative stress	261/6564	412/13277	5.44589e-09	1.35369e-07	1.10647e-07	261
GO:0019318	hexose metabolic process	167/6564	248/13277	6.79883e-09	1.62892e-07	1.33143e-07	167
GO:0006986	response to unfolded protein	122/6564	172/13277	6.96918e-09	1.62892e-07	1.33143e-07	122
GO:0034620	cellular response to unfolded protein	122/6564	172/13277	6.96918e-09	1.62892e-07	1.33143e-07	122
GO:0035967	cellular response to topologically incorrect protein	122/6564	172/13277	6.96918e-09	1.62892e-07	1.33143e-07	122
GO:0030968	endoplasmic reticulum unfolded protein response	120/6564	170/13277	1.46222e-08	3.36741e-07	2.75242e-07	120
GO:0010286	heat acclimation	62/6564	77/13277	1.62839e-08	3.69574e-07	3.02078e-07	62
GO:0019395	fatty acid oxidation	112/6564	157/13277	1.71467e-08	3.83596e-07	3.1354e-07	112
GO:0072329	monocarboxylic acid catabolic process	135/6564	196/13277	2.24182e-08	4.94462e-07	4.04158e-07	135
GO:0030258	lipid modification	120/6564	171/13277	2.52468e-08	5.49118e-07	4.48832e-07	120
GO:0044242	cellular lipid catabolic process	140/6564	205/13277	2.88968e-08	6.19895e-07	5.06683e-07	140
GO:0071215	cellular response to abscisic acid stimulus	165/6564	248/13277	3.07014e-08	6.41046e-07	5.23971e-07	165
GO:0097306	cellular response to alcohol	165/6564	248/13277	3.07014e-08	6.41046e-07	5.23971e-07	165
GO:0009126	purine nucleoside monophosphate metabolic process	142/6564	210/13277	6.08484e-08	1.23751e-06	1.01151e-06	142
GO:0009167	purine ribonucleoside monophosphate metabolic process	142/6564	210/13277	6.08484e-08	1.23751e-06	1.01151e-06	142
GO:0034440	lipid oxidation	116/6564	166/13277	6.25237e-08	1.25528e-06	1.02603e-06	116
GO:0043603	cellular amide metabolic process	298/6564	487/13277	7.32101e-08	1.44606e-06	1.18196e-06	298
GO:0015980	energy derivation by oxidation of organic compounds	57/6564	71/13277	7.57194e-08	1.44606e-06	1.18196e-06	57
GO:0043090	amino acid import	57/6564	71/13277	7.57194e-08	1.44606e-06	1.18196e-06	57
GO:0045333	cellular respiration	57/6564	71/13277	7.57194e-08	1.44606e-06	1.18196e-06	57
GO:0044265	cellular macromolecule catabolic process	299/6564	489/13277	7.70773e-08	1.45425e-06	1.18866e-06	299
GO:0016042	lipid catabolic process	141/6564	209/13277	8.41939e-08	1.56962e-06	1.28296e-06	141
GO:0009141	nucleoside triphosphate metabolic process	138/6564	204/13277	8.9557e-08	1.64996e-06	1.34862e-06	138
GO:0000302	response to reactive oxygen species	180/6564	277/13277	9.8565e-08	1.7948e-06	1.46701e-06	180
GO:0009144	purine nucleoside triphosphate metabolic process	137/6564	203/13277	1.23966e-07	2.157e-06	1.76307e-06	137
GO:0009199	ribonucleoside triphosphate metabolic process	137/6564	203/13277	1.23966e-07	2.157e-06	1.76307e-06	137
GO:0009205	purine ribonucleoside triphosphate metabolic process	137/6564	203/13277	1.23966e-07	2.157e-06	1.76307e-06	137
GO:0046034	ATP metabolic process	137/6564	203/13277	1.23966e-07	2.157e-06	1.76307e-06	137
GO:0046482	para-aminobenzoic acid metabolic process	32/6564	35/13277	1.45501e-07	2.50389e-06	2.04661e-06	32
GO:0043543	protein acylation	110/6564	158/13277	1.85594e-07	3.15913e-06	2.58218e-06	110
GO:0009123	nucleoside monophosphate metabolic process	142/6564	213/13277	2.30577e-07	3.84131e-06	3.13977e-06	142
GO:0009161	ribonucleoside monophosphate metabolic process	142/6564	213/13277	2.30577e-07	3.84131e-06	3.13977e-06	142
GO:0010498	proteasomal protein catabolic process	119/6564	174/13277	2.75917e-07	4.54827e-06	3.71761e-06	119
GO:0009723	response to ethylene	191/6564	300/13277	3.64462e-07	5.94529e-06	4.8595e-06	191
GO:0019363	pyridine nucleotide biosynthetic process	130/6564	194/13277	4.77757e-07	7.71306e-06	6.30442e-06	130
GO:0009738	abscisic acid-activated signaling pathway	154/6564	236/13277	5.57138e-07	8.90283e-06	7.2769e-06	154
GO:0010260	animal organ senescence	27/6564	29/13277	5.97225e-07	9.44701e-06	7.72169e-06	27
GO:0072522	purine-containing compound biosynthetic process	159/6564	245/13277	6.12641e-07	9.59396e-06	7.84181e-06	159
GO:0006891	intra-Golgi vesicle-mediated transport	47/6564	58/13277	6.38752e-07	9.90382e-06	8.09508e-06	47
GO:0019359	nicotinamide nucleotide biosynthetic process	127/6564	190/13277	7.95475e-07	1.22129e-05	9.98243e-06	127
GO:0006164	purine nucleotide biosynthetic process	155/6564	239/13277	8.99327e-07	1.36733e-05	1.11761e-05	155
GO:0009611	response to wounding	191/6564	303/13277	9.99115e-07	1.50444e-05	1.22968e-05	191
GO:0009127	purine nucleoside monophosphate biosynthetic process	131/6564	198/13277	1.26312e-06	1.86608e-05	1.52528e-05	131
GO:0009168	purine ribonucleoside monophosphate biosynthetic process	131/6564	198/13277	1.26312e-06	1.86608e-05	1.52528e-05	131
GO:0006094	gluconeogenesis	100/6564	145/13277	1.33071e-06	1.94757e-05	1.59188e-05	100
GO:0009166	nucleotide catabolic process	123/6564	185/13277	1.80315e-06	2.56703e-05	2.09821e-05	123
GO:0046939	nucleotide phosphorylation	123/6564	185/13277	1.80315e-06	2.56703e-05	2.09821e-05	123
GO:1901292	nucleoside phosphate catabolic process	123/6564	185/13277	1.80315e-06	2.56703e-05	2.09821e-05	123
GO:0046364	monosaccharide biosynthetic process	109/6564	161/13277	1.86011e-06	2.60283e-05	2.12747e-05	109
GO:0009142	nucleoside triphosphate biosynthetic process	127/6564	192/13277	1.86154e-06	2.60283e-05	2.12747e-05	127
GO:0010243	response to organonitrogen compound	249/6564	410/13277	2.01328e-06	2.79009e-05	2.28053e-05	249
GO:0072525	pyridine-containing compound biosynthetic process	132/6564	201/13277	2.11515e-06	2.90555e-05	2.3749e-05	132
GO:0006096	glycolytic process	122/6564	184/13277	2.45413e-06	3.10834e-05	2.54066e-05	122
GO:0006165	nucleoside diphosphate phosphorylation	122/6564	184/13277	2.45413e-06	3.10834e-05	2.54066e-05	122
GO:0006757	ATP generation from ADP	122/6564	184/13277	2.45413e-06	3.10834e-05	2.54066e-05	122
GO:0009135	purine nucleoside diphosphate metabolic process	122/6564	184/13277	2.45413e-06	3.10834e-05	2.54066e-05	122
GO:0009179	purine ribonucleoside diphosphate metabolic process	122/6564	184/13277	2.45413e-06	3.10834e-05	2.54066e-05	122
GO:0009185	ribonucleoside diphosphate metabolic process	122/6564	184/13277	2.45413e-06	3.10834e-05	2.54066e-05	122
GO:0042866	pyruvate biosynthetic process	122/6564	184/13277	2.45413e-06	3.10834e-05	2.54066e-05	122
GO:0046031	ADP metabolic process	122/6564	184/13277	2.45413e-06	3.10834e-05	2.54066e-05	122
GO:0019319	hexose biosynthetic process	101/6564	148/13277	2.51903e-06	3.10834e-05	2.54066e-05	101
GO:0006754	ATP biosynthetic process	126/6564	191/13277	2.52081e-06	3.10834e-05	2.54066e-05	126
GO:0009145	purine nucleoside triphosphate biosynthetic process	126/6564	191/13277	2.52081e-06	3.10834e-05	2.54066e-05	126
GO:0009201	ribonucleoside triphosphate biosynthetic process	126/6564	191/13277	2.52081e-06	3.10834e-05	2.54066e-05	126
GO:0009206	purine ribonucleoside triphosphate biosynthetic process	126/6564	191/13277	2.52081e-06	3.10834e-05	2.54066e-05	126
GO:0009132	nucleoside diphosphate metabolic process	123/6564	186/13277	2.74377e-06	3.35683e-05	2.74377e-05	123
GO:0009124	nucleoside monophosphate biosynthetic process	131/6564	200/13277	2.84403e-06	3.42596e-05	2.80028e-05	131
GO:0009156	ribonucleoside monophosphate biosynthetic process	131/6564	200/13277	2.84403e-06	3.42596e-05	2.80028e-05	131
GO:0009152	purine ribonucleotide biosynthetic process	139/6564	215/13277	4.1686e-06	4.98323e-05	4.07314e-05	139
GO:0034404	nucleobase-containing small molecule biosynthetic process	126/6564	193/13277	5.6116e-06	6.6574e-05	5.44155e-05	126
GO:0010200	response to chitin	235/6564	389/13277	6.66988e-06	7.8534e-05	6.41913e-05	235
GO:0009259	ribonucleotide metabolic process	247/6564	411/13277	6.74422e-06	7.88167e-05	6.44224e-05	247
GO:0051604	protein maturation	51/6564	67/13277	6.88685e-06	7.98875e-05	6.52976e-05	51
GO:0006913	nucleocytoplasmic transport	95/6564	140/13277	7.2173e-06	8.24985e-05	6.74318e-05	95
GO:0051169	nuclear transport	95/6564	140/13277	7.2173e-06	8.24985e-05	6.74318e-05	95
GO:0046434	organophosphate catabolic process	134/6564	208/13277	8.08892e-06	9.17916e-05	7.50276e-05	134
GO:0034504	protein localization to nucleus	68/6564	95/13277	9.01631e-06	0.000100946	8.25099e-05	68
GO:0009060	aerobic respiration	34/6564	41/13277	9.02452e-06	0.000100946	8.25099e-05	34
GO:0016197	endosomal transport	27/6564	31/13277	1.27874e-05	0.000142022	0.000116084	27
GO:0051170	import into nucleus	66/6564	93/13277	1.92611e-05	0.000212414	0.000173621	66
GO:0006606	protein import into nucleus	64/6564	90/13277	2.3144e-05	0.000253451	0.000207163	64
GO:0015931	nucleobase-containing compound transport	78/6564	114/13277	2.95628e-05	0.000321496	0.000262781	78
GO:0015824	proline transport	49/6564	66/13277	3.35395e-05	0.000362227	0.000296073	49
GO:0052542	defense response by callose deposition	44/6564	58/13277	3.42052e-05	0.000366886	0.000299881	44
GO:0009620	response to fungus	256/6564	435/13277	3.88709e-05	0.000414095	0.000338468	256
GO:0009414	response to water deprivation	221/6564	372/13277	5.73316e-05	0.00060663	0.000495841	221
GO:0046700	heterocycle catabolic process	256/6564	437/13277	6.01344e-05	0.000632017	0.000516591	256
GO:0042538	hyperosmotic salinity response	95/6564	145/13277	6.25436e-05	0.000652955	0.000533706	95
GO:1901361	organic cyclic compound catabolic process	259/6564	443/13277	6.58174e-05	0.000682583	0.000557922	259
GO:0072527	pyrimidine-containing compound metabolic process	88/6564	133/13277	6.71537e-05	0.000691859	0.000565505	88
GO:0043069	negative regulation of programmed cell death	100/6564	154/13277	6.91338e-05	0.000707605	0.000578375	100
GO:0009846	pollen germination	30/6564	37/13277	7.17393e-05	0.000728248	0.000595248	30
GO:0006972	hyperosmotic response	141/6564	227/13277	7.20808e-05	0.000728248	0.000595248	141
GO:0044270	cellular nitrogen compound catabolic process	254/6564	435/13277	8.66863e-05	0.000870197	0.000711272	254
GO:0072521	purine-containing compound metabolic process	202/6564	339/13277	9.21416e-05	0.000919068	0.000751218	202
GO:0009218	pyrimidine ribonucleotide metabolic process	80/6564	120/13277	9.61242e-05	0.000946733	0.00077383	80
GO:0009220	pyrimidine ribonucleotide biosynthetic process	80/6564	120/13277	9.61242e-05	0.000946733	0.00077383	80
GO:0016054	organic acid catabolic process	195/6564	327/13277	0.000113847	0.00110735	0.000905117	195
GO:0046395	carboxylic acid catabolic process	195/6564	327/13277	0.000113847	0.00110735	0.000905117	195
GO:0055114	oxidation-reduction process	196/6564	329/13277	0.000118309	0.00114366	0.000934791	196
GO:0006487	protein N-linked glycosylation	61/6564	88/13277	0.000119362	0.00114675	0.000937318	61
GO:0015804	neutral amino acid transport	49/6564	68/13277	0.000121318	0.00115844	0.000946874	49
GO:0009415	response to water	221/6564	376/13277	0.000142467	0.00135214	0.0011052	221
GO:0006220	pyrimidine nucleotide metabolic process	80/6564	121/13277	0.000146989	0.00137835	0.00112662	80
GO:0006221	pyrimidine nucleotide biosynthetic process	80/6564	121/13277	0.000146989	0.00137835	0.00112662	80
GO:0034655	nucleobase-containing compound catabolic process	184/6564	308/13277	0.000153212	0.00142815	0.00116733	184
GO:0060548	negative regulation of cell death	101/6564	158/13277	0.000157602	0.00146038	0.00119367	101
GO:0006413	translational initiation	32/6564	41/13277	0.000161436	0.00148711	0.00121552	32
GO:0010167	response to nitrate	81/6564	123/13277	0.000163834	0.00150037	0.00122636	81
GO:0009553	embryo sac development	130/6564	210/13277	0.000167898	0.00152866	0.00124948	130
GO:0048229	gametophyte development	228/6564	390/13277	0.000176884	0.00160115	0.00130873	228
GO:0019439	aromatic compound catabolic process	252/6564	435/13277	0.000186278	0.0016765	0.00137032	252
GO:0071396	cellular response to lipid	196/6564	331/13277	0.000189411	0.00169496	0.00138541	196
GO:0006397	mRNA processing	75/6564	113/13277	0.00019465	0.00173194	0.00141564	75
GO:0000741	karyogamy	35/6564	46/13277	0.00019773	0.00173958	0.00142188	35
GO:0048284	organelle fusion	35/6564	46/13277	0.00019773	0.00173958	0.00142188	35
GO:0006007	glucose catabolic process	58/6564	84/13277	0.000206039	0.00180256	0.00147335	58
GO:0000398	mRNA splicing, via spliceosome	59/6564	86/13277	0.000239895	0.00208708	0.00170592	59
GO:0072528	pyrimidine-containing compound biosynthetic process	83/6564	128/13277	0.000296908	0.00256883	0.00209968	83
GO:0006486	protein glycosylation	110/6564	176/13277	0.000304967	0.0025815	0.00211004	110
GO:0009101	glycoprotein biosynthetic process	110/6564	176/13277	0.000304967	0.0025815	0.00211004	110
GO:0043413	macromolecule glycosylation	110/6564	176/13277	0.000304967	0.0025815	0.00211004	110
GO:0070085	glycosylation	110/6564	176/13277	0.000304967	0.0025815	0.00211004	110
GO:0022412	cellular process involved in reproduction in multicellular organism	98/6564	155/13277	0.000351713	0.0029612	0.00242039	98
GO:0017038	protein import	123/6564	200/13277	0.00036514	0.0030578	0.00249935	123
GO:0019320	hexose catabolic process	59/6564	87/13277	0.000387979	0.00319777	0.00261376	59
GO:0033037	polysaccharide localization	59/6564	87/13277	0.000387979	0.00319777	0.00261376	59
GO:0046365	monosaccharide catabolic process	59/6564	87/13277	0.000387979	0.00319777	0.00261376	59
GO:0000469	cleavage involved in rRNA processing	14/6564	15/13277	0.000418455	0.00343089	0.0028043	14
GO:0015706	nitrate transport	83/6564	129/13277	0.000431663	0.00352075	0.00287775	83
GO:0009642	response to light intensity	150/6564	251/13277	0.000584713	0.00474436	0.00387789	150
GO:0006163	purine nucleotide metabolic process	186/6564	318/13277	0.000648274	0.00523298	0.00427727	186
GO:0051168	nuclear export	46/6564	66/13277	0.000663062	0.0053249	0.0043524	46
GO:0009100	glycoprotein metabolic process	113/6564	184/13277	0.000668524	0.00534137	0.00436587	113
GO:0009699	phenylpropanoid biosynthetic process	64/6564	97/13277	0.000711476	0.00565569	0.00462279	64
GO:0009644	response to high light intensity	121/6564	199/13277	0.000765004	0.00605049	0.00494548	121
GO:0000478	endonucleolytic cleavage involved in rRNA processing	13/6564	14/13277	0.000794172	0.0060667	0.00495873	13
GO:0006119	oxidative phosphorylation	13/6564	14/13277	0.000794172	0.0060667	0.00495873	13
GO:0010104	regulation of ethylene-activated signaling pathway	13/6564	14/13277	0.000794172	0.0060667	0.00495873	13
GO:0042773	ATP synthesis coupled electron transport	13/6564	14/13277	0.000794172	0.0060667	0.00495873	13
GO:0042775	mitochondrial ATP synthesis coupled electron transport	13/6564	14/13277	0.000794172	0.0060667	0.00495873	13
GO:0070297	regulation of phosphorelay signal transduction system	13/6564	14/13277	0.000794172	0.0060667	0.00495873	13
GO:0090502	RNA phosphodiester bond hydrolysis, endonucleolytic	13/6564	14/13277	0.000794172	0.0060667	0.00495873	13
GO:0009692	ethylene metabolic process	70/6564	108/13277	0.000872688	0.00647692	0.00529403	70
GO:0009693	ethylene biosynthetic process	70/6564	108/13277	0.000872688	0.00647692	0.00529403	70
GO:0043449	cellular alkene metabolic process	70/6564	108/13277	0.000872688	0.00647692	0.00529403	70
GO:0043450	alkene biosynthetic process	70/6564	108/13277	0.000872688	0.00647692	0.00529403	70
GO:1900673	olefin metabolic process	70/6564	108/13277	0.000872688	0.00647692	0.00529403	70
GO:1900674	olefin biosynthetic process	70/6564	108/13277	0.000872688	0.00647692	0.00529403	70
GO:0006611	protein export from nucleus	45/6564	65/13277	0.000949256	0.00701196	0.00573136	45
GO:0000375	RNA splicing, via transesterification reactions	63/6564	96/13277	0.000964537	0.00705825	0.00576919	63
GO:0000377	RNA splicing, via transesterification reactions with bulged adenosine as nucleophile	63/6564	96/13277	0.000964537	0.00705825	0.00576919	63
GO:0052545	callose localization	56/6564	84/13277	0.00103094	0.0075091	0.00613771	56
GO:0032259	methylation	255/6564	450/13277	0.00105203	0.00759205	0.0062055	255
GO:0043414	macromolecule methylation	255/6564	450/13277	0.00105203	0.00759205	0.0062055	255
GO:0006403	RNA localization	43/6564	62/13277	0.00115638	0.00815714	0.00666739	43
GO:0006405	RNA export from nucleus	43/6564	62/13277	0.00115638	0.00815714	0.00666739	43
GO:0050657	nucleic acid transport	43/6564	62/13277	0.00115638	0.00815714	0.00666739	43
GO:0050658	RNA transport	43/6564	62/13277	0.00115638	0.00815714	0.00666739	43
GO:0051236	establishment of RNA localization	43/6564	62/13277	0.00115638	0.00815714	0.00666739	43
GO:0016052	carbohydrate catabolic process	180/6564	310/13277	0.00126031	0.0088504	0.00723405	180
GO:0007276	gamete generation	104/6564	170/13277	0.00129347	0.00900254	0.0073584	104
GO:0015698	inorganic anion transport	104/6564	170/13277	0.00129347	0.00900254	0.0073584	104

## Sheet: GO_BP_Protoplast_Leaf0h.DW
ID	Description	GeneRatio	BgRatio	pvalue	p.adjust	qvalue	Count
GO:0009657	plastid organization	327/6713	364/13277	2.04126e-59	3.19865e-56	2.23249e-56	327
GO:0015979	photosynthesis	288/6713	314/13277	3.33699e-57	2.61453e-54	1.82481e-54	288
GO:0019684	photosynthesis, light reaction	236/6713	252/13277	2.20861e-51	1.15363e-48	8.05172e-49	236
GO:0019288	isopentenyl diphosphate biosynthetic process, methylerythritol 4-phosphate pathway	210/6713	222/13277	7.37462e-48	2.60576e-45	1.81869e-45	210
GO:0019682	glyceraldehyde-3-phosphate metabolic process	279/6713	315/13277	8.31449e-48	2.60576e-45	1.81869e-45	279
GO:0009240	isopentenyl diphosphate biosynthetic process	210/6713	225/13277	3.89512e-45	8.71951e-43	6.08576e-43	210
GO:0046490	isopentenyl diphosphate metabolic process	210/6713	225/13277	3.89512e-45	8.71951e-43	6.08576e-43	210
GO:0009668	plastid membrane organization	180/6713	189/13277	2.13714e-42	3.72099e-40	2.59706e-40	180
GO:0010027	thylakoid membrane organization	180/6713	189/13277	2.13714e-42	3.72099e-40	2.59706e-40	180
GO:0005982	starch metabolic process	198/6713	215/13277	3.0539e-40	4.78546e-38	3.34e-38	198
GO:0010016	shoot system morphogenesis	329/6713	403/13277	1.38035e-39	1.96637e-37	1.37242e-37	329
GO:0010207	photosystem II assembly	142/6713	146/13277	4.83681e-37	6.31607e-35	4.40829e-35	142
GO:0061024	membrane organization	184/6713	202/13277	8.8855e-36	1.07104e-33	7.47533e-34	184
GO:0019252	starch biosynthetic process	165/6713	178/13277	1.21315e-34	1.35786e-32	9.47719e-33	165
GO:0009658	chloroplast organization	196/6713	221/13277	4.96479e-34	5.18655e-32	3.61994e-32	196
GO:0000023	maltose metabolic process	136/6713	143/13277	4.51175e-32	4.41869e-30	3.08402e-30	136
GO:0006081	cellular aldehyde metabolic process	316/6713	403/13277	1.16227e-31	1.07134e-29	7.47738e-30	316
GO:0008299	isoprenoid biosynthetic process	302/6713	382/13277	1.80121e-31	1.56805e-29	1.09442e-29	302
GO:0006720	isoprenoid metabolic process	309/6713	399/13277	3.23716e-29	2.66981e-27	1.86339e-27	309
GO:0051656	establishment of organelle localization	100/6713	101/13277	8.47507e-29	6.64021e-27	4.63452e-27	100
GO:0009902	chloroplast relocation	97/6713	98/13277	6.50339e-28	4.24617e-26	2.96361e-26	97
GO:0019750	chloroplast localization	97/6713	98/13277	6.50339e-28	4.24617e-26	2.96361e-26	97
GO:0051644	plastid localization	97/6713	98/13277	6.50339e-28	4.24617e-26	2.96361e-26	97
GO:0051667	establishment of plastid localization	97/6713	98/13277	6.50339e-28	4.24617e-26	2.96361e-26	97
GO:0005984	disaccharide metabolic process	154/6713	173/13277	2.154e-27	1.35013e-25	9.42317e-26	154
GO:0010103	stomatal complex morphogenesis	119/6713	127/13277	1.85174e-26	1.08301e-24	7.55881e-25	119
GO:0008654	phospholipid biosynthetic process	273/6713	351/13277	1.86606e-26	1.08301e-24	7.55881e-25	273
GO:0009311	oligosaccharide metabolic process	162/6713	187/13277	1.0448e-25	5.84713e-24	4.08099e-24	162
GO:0010374	stomatal complex development	158/6713	185/13277	1.15007e-23	6.21436e-22	4.3373e-22	158
GO:0090698	post-embryonic plant morphogenesis	282/6713	374/13277	1.65545e-23	8.64699e-22	6.03514e-22	282
GO:0046148	pigment biosynthetic process	191/6713	234/13277	2.19987e-23	1.112e-21	7.76115e-22	191
GO:0010075	regulation of meristem growth	130/6713	146/13277	2.45402e-23	1.2017e-21	8.38724e-22	130
GO:0000271	polysaccharide biosynthetic process	355/6713	493/13277	4.30995e-23	2.04657e-21	1.4284e-21	355
GO:0006644	phospholipid metabolic process	276/6713	366/13277	4.82064e-23	2.22175e-21	1.55066e-21	276
GO:0015995	chlorophyll biosynthetic process	107/6713	117/13277	1.23675e-21	5.48372e-20	3.82735e-20	107
GO:0035266	meristem growth	133/6713	153/13277	1.25982e-21	5.48372e-20	3.82735e-20	133
GO:0044272	sulfur compound biosynthetic process	311/6713	429/13277	4.23071e-21	1.79176e-19	1.25056e-19	311
GO:0006073	cellular glucan metabolic process	261/6713	349/13277	5.68489e-21	2.28416e-19	1.59422e-19	261
GO:0044042	glucan metabolic process	261/6713	349/13277	5.68489e-21	2.28416e-19	1.59422e-19	261
GO:0006098	pentose-phosphate shunt	141/6713	167/13277	2.85239e-20	1.09017e-18	7.60881e-19	141
GO:0051156	glucose 6-phosphate metabolic process	141/6713	167/13277	2.85239e-20	1.09017e-18	7.60881e-19	141
GO:0010073	meristem maintenance	189/6713	239/13277	3.8869e-20	1.45018e-18	1.01215e-18	189
GO:0090626	plant epidermis morphogenesis	204/6713	263/13277	8.23694e-20	3.00169e-18	2.09503e-18	204
GO:0044264	cellular polysaccharide metabolic process	350/6713	499/13277	1.15152e-19	4.10098e-18	2.86227e-18	350
GO:0016109	tetraterpenoid biosynthetic process	90/6713	97/13277	1.72362e-19	5.87156e-18	4.09804e-18	90
GO:0016117	carotenoid biosynthetic process	90/6713	97/13277	1.72362e-19	5.87156e-18	4.09804e-18	90
GO:0006739	NADP metabolic process	142/6713	171/13277	4.81719e-19	1.60607e-17	1.12095e-17	142
GO:0033014	tetrapyrrole biosynthetic process	122/6713	143/13277	1.75413e-18	5.72651e-17	3.9968e-17	122
GO:0016108	tetraterpenoid metabolic process	91/6713	100/13277	3.24779e-18	1.01786e-16	7.10412e-17	91
GO:0016116	carotenoid metabolic process	91/6713	100/13277	3.24779e-18	1.01786e-16	7.10412e-17	91
GO:0044093	positive regulation of molecular function	99/6713	111/13277	3.45468e-18	1.06147e-16	7.40849e-17	99
GO:0042793	plastid transcription	68/6713	70/13277	3.75429e-18	1.13134e-16	7.89616e-17	68
GO:0009250	glucan biosynthetic process	204/6713	268/13277	3.86912e-18	1.14395e-16	7.98415e-17	204
GO:0009965	leaf morphogenesis	154/6713	191/13277	4.05938e-18	1.17797e-16	8.22162e-17	154
GO:0035303	regulation of dephosphorylation	111/6713	128/13277	4.4e-18	1.23122e-16	8.59324e-17	111
GO:0035304	regulation of protein dephosphorylation	111/6713	128/13277	4.4e-18	1.23122e-16	8.59324e-17	111
GO:0006779	porphyrin-containing compound biosynthetic process	120/6713	141/13277	5.07989e-18	1.39652e-16	9.747e-17	120
GO:0043085	positive regulation of catalytic activity	98/6713	110/13277	6.14148e-18	1.65926e-16	1.15808e-16	98
GO:0042440	pigment metabolic process	230/6713	310/13277	6.64757e-18	1.76555e-16	1.23226e-16	230
GO:0016556	mRNA modification	94/6713	105/13277	1.36323e-17	3.56031e-16	2.48491e-16	94
GO:0033692	cellular polysaccharide biosynthetic process	295/6713	420/13277	7.02988e-17	1.80587e-15	1.26041e-15	295
GO:0019220	regulation of phosphate metabolic process	144/6713	179/13277	7.3039e-17	1.8167e-15	1.26796e-15	144
GO:0051174	regulation of phosphorus metabolic process	144/6713	179/13277	7.3039e-17	1.8167e-15	1.26796e-15	144
GO:0048509	regulation of meristem development	149/6713	187/13277	1.07866e-16	2.64102e-15	1.84329e-15	149
GO:0048507	meristem development	288/6713	411/13277	2.74142e-16	6.60894e-15	4.6127e-15	288
GO:0034637	cellular carbohydrate biosynthetic process	308/6713	445/13277	3.82233e-16	9.07514e-15	6.33397e-15	308
GO:0051640	organelle localization	126/6713	154/13277	5.03755e-16	1.17819e-14	8.22312e-15	126
GO:0031399	regulation of protein modification process	147/6713	186/13277	6.55298e-16	1.51008e-14	1.05395e-14	147
GO:0016072	rRNA metabolic process	174/6713	228/13277	7.48235e-16	1.69925e-14	1.18599e-14	174
GO:0006364	rRNA processing	172/6713	225/13277	8.27295e-16	1.85196e-14	1.29257e-14	172
GO:0009069	serine family amino acid metabolic process	175/6713	231/13277	2.13609e-15	4.71445e-14	3.29044e-14	175
GO:0009637	response to blue light	99/6713	116/13277	2.89442e-15	6.29939e-14	4.39665e-14	99
GO:0015994	chlorophyll metabolic process	142/6713	181/13277	6.34552e-15	1.36211e-13	9.50685e-14	142
GO:0007017	microtubule-based process	172/6713	229/13277	1.49634e-14	3.16859e-13	2.21151e-13	172
GO:0000226	microtubule cytoskeleton organization	165/6713	218/13277	1.56951e-14	3.27923e-13	2.28873e-13	165
GO:0034660	ncRNA metabolic process	231/6713	326/13277	3.74464e-14	7.72086e-13	5.38876e-13	231
GO:0050790	regulation of catalytic activity	138/6713	177/13277	3.79562e-14	7.72434e-13	5.39119e-13	138
GO:0019344	cysteine biosynthetic process	144/6713	187/13277	6.57953e-14	1.32181e-12	9.22555e-13	144
GO:0048437	floral organ development	287/6713	421/13277	8.00028e-14	1.58689e-12	1.10757e-12	287
GO:0006534	cysteine metabolic process	145/6713	189/13277	9.22392e-14	1.80674e-12	1.26101e-12	145
GO:0033013	tetrapyrrole metabolic process	157/6713	208/13277	1.02788e-13	1.9885e-12	1.38787e-12	157
GO:0006778	porphyrin-containing compound metabolic process	156/6713	207/13277	1.55118e-13	2.96427e-12	2.0689e-12	156
GO:0009070	serine family amino acid biosynthetic process	145/6713	190/13277	1.95917e-13	3.69881e-12	2.58158e-12	145
GO:0010155	regulation of proton transport	66/6713	73/13277	3.27797e-13	6.11498e-12	4.26794e-12	66
GO:0048438	floral whorl development	237/6713	341/13277	5.16822e-13	9.52777e-12	6.64989e-12	237
GO:0000096	sulfur amino acid metabolic process	217/6713	308/13277	5.76064e-13	1.04964e-11	7.32596e-12	217
GO:0045036	protein targeting to chloroplast	56/6713	60/13277	7.36583e-13	1.29688e-11	9.05156e-12	56
GO:0072596	establishment of protein localization to chloroplast	56/6713	60/13277	7.36583e-13	1.29688e-11	9.05156e-12	56
GO:0072598	protein localization to chloroplast	56/6713	60/13277	7.36583e-13	1.29688e-11	9.05156e-12	56
GO:0010218	response to far red light	77/6713	89/13277	8.02315e-13	1.39692e-11	9.74977e-12	77
GO:0009825	multidimensional cell growth	81/6713	95/13277	1.11538e-12	1.92066e-11	1.34052e-11	81
GO:0009767	photosynthetic electron transport chain	58/6713	63/13277	1.35809e-12	2.30307e-11	1.60742e-11	58
GO:0051246	regulation of protein metabolic process	177/6713	244/13277	1.36685e-12	2.30307e-11	1.60742e-11	177
GO:0034470	ncRNA processing	184/6713	256/13277	1.95663e-12	3.26174e-11	2.27652e-11	184
GO:0051258	protein polymerization	127/6713	165/13277	2.11406e-12	3.48708e-11	2.4338e-11	127
GO:0032268	regulation of cellular protein metabolic process	174/6713	240/13277	2.29836e-12	3.75159e-11	2.61841e-11	174
GO:0007389	pattern specification process	195/6713	275/13277	3.36424e-12	5.4348e-11	3.79321e-11	195
GO:0048638	regulation of developmental growth	162/6713	222/13277	5.47823e-12	8.75957e-11	6.11372e-11	162
GO:1904062	regulation of cation transmembrane transport	66/6713	75/13277	6.44365e-12	1.01992e-10	7.1185e-11	66
GO:0006470	protein dephosphorylation	126/6713	165/13277	6.91993e-12	1.08435e-10	7.56822e-11	126
GO:0016311	dephosphorylation	139/6713	187/13277	1.89877e-11	2.94591e-10	2.05609e-10	139
GO:0007010	cytoskeleton organization	277/6713	417/13277	2.12122e-11	3.25877e-10	2.27445e-10	277
GO:0097435	supramolecular fiber organization	151/6713	207/13277	3.01555e-11	4.58773e-10	3.20199e-10	151
GO:0009773	photosynthetic electron transport in photosystem I	43/6713	45/13277	4.38275e-11	6.60362e-10	4.60898e-10	43
GO:0016143	S-glycoside metabolic process	130/6713	174/13277	4.67863e-11	6.85178e-10	4.78219e-10	130
GO:0019757	glycosinolate metabolic process	130/6713	174/13277	4.67863e-11	6.85178e-10	4.78219e-10	130
GO:0019760	glucosinolate metabolic process	130/6713	174/13277	4.67863e-11	6.85178e-10	4.78219e-10	130
GO:0000097	sulfur amino acid biosynthetic process	190/6713	272/13277	5.35825e-11	7.77443e-10	5.42614e-10	190
GO:0016144	S-glycoside biosynthetic process	113/6713	148/13277	8.56635e-11	1.20932e-09	8.44043e-10	113
GO:0019758	glycosinolate biosynthetic process	113/6713	148/13277	8.56635e-11	1.20932e-09	8.44043e-10	113
GO:0019761	glucosinolate biosynthetic process	113/6713	148/13277	8.56635e-11	1.20932e-09	8.44043e-10	113
GO:0009799	specification of symmetry	79/6713	96/13277	8.6668e-11	1.21258e-09	8.46316e-10	79
GO:0009855	determination of bilateral symmetry	78/6713	95/13277	1.42171e-10	1.97152e-09	1.37602e-09	78
GO:0065009	regulation of molecular function	150/6713	208/13277	1.44991e-10	1.99299e-09	1.391e-09	150
GO:0008652	cellular amino acid biosynthetic process	270/6713	410/13277	1.53725e-10	2.09467e-09	1.46197e-09	270
GO:0006090	pyruvate metabolic process	263/6713	398/13277	1.56667e-10	2.11636e-09	1.47711e-09	263
GO:0007020	microtubule nucleation	55/6713	62/13277	1.91416e-10	2.54894e-09	1.77903e-09	55
GO:1901659	glycosyl compound biosynthetic process	118/6713	157/13277	1.91943e-10	2.54894e-09	1.77903e-09	118
GO:0010114	response to red light	75/6713	91/13277	2.26561e-10	2.98337e-09	2.08224e-09	75
GO:0006655	phosphatidylglycerol biosynthetic process	54/6713	61/13277	3.37862e-10	4.40722e-09	3.07601e-09	54
GO:1902600	proton transmembrane transport	70/6713	84/13277	3.40315e-10	4.40722e-09	3.07601e-09	70
GO:0016114	terpenoid biosynthetic process	141/6713	195/13277	3.80058e-10	4.88157e-09	3.40708e-09	141
GO:0046785	microtubule polymerization	56/6713	64/13277	4.38303e-10	5.58391e-09	3.89728e-09	56
GO:0040008	regulation of growth	173/6713	248/13277	4.6205e-10	5.83897e-09	4.0753e-09	173
GO:0031109	microtubule polymerization or depolymerization	58/6713	67/13277	5.40931e-10	6.78112e-09	4.73287e-09	58
GO:0031328	positive regulation of cellular biosynthetic process	267/6713	409/13277	7.43119e-10	9.24181e-09	6.4503e-09	267
GO:0006091	generation of precursor metabolites and energy	306/6713	477/13277	7.68664e-10	9.48422e-09	6.61949e-09	306
GO:0031325	positive regulation of cellular metabolic process	279/6713	430/13277	7.93463e-10	9.71372e-09	6.77967e-09	279
GO:0032535	regulation of cellular component size	111/6713	148/13277	8.23355e-10	9.92459e-09	6.92685e-09	111
GO:0090066	regulation of anatomical structure size	111/6713	148/13277	8.23355e-10	9.92459e-09	6.92685e-09	111
GO:0010014	meristem initiation	109/6713	145/13277	9.27154e-10	1.09837e-08	7.66604e-09	109
GO:0006636	unsaturated fatty acid biosynthetic process	57/6713	66/13277	9.32246e-10	1.09837e-08	7.66604e-09	57
GO:0033559	unsaturated fatty acid metabolic process	57/6713	66/13277	9.32246e-10	1.09837e-08	7.66604e-09	57
GO:0046471	phosphatidylglycerol metabolic process	54/6713	62/13277	1.32638e-09	1.55107e-08	1.08257e-08	54
GO:0045935	positive regulation of nucleobase-containing compound metabolic process	255/6713	390/13277	1.43011e-09	1.65998e-08	1.15858e-08	255
GO:0051173	positive regulation of nitrogen compound metabolic process	271/6713	418/13277	1.56599e-09	1.78232e-08	1.24397e-08	271
GO:0043473	pigmentation	75/6713	93/13277	1.61512e-09	1.78232e-08	1.24397e-08	75
GO:0043476	pigment accumulation	75/6713	93/13277	1.61512e-09	1.78232e-08	1.24397e-08	75
GO:0043478	pigment accumulation in response to UV light	75/6713	93/13277	1.61512e-09	1.78232e-08	1.24397e-08	75
GO:0043479	pigment accumulation in tissues in response to UV light	75/6713	93/13277	1.61512e-09	1.78232e-08	1.24397e-08	75
GO:0043480	pigment accumulation in tissues	75/6713	93/13277	1.61512e-09	1.78232e-08	1.24397e-08	75
GO:0043481	anthocyanin accumulation in tissues in response to UV light	75/6713	93/13277	1.61512e-09	1.78232e-08	1.24397e-08	75
GO:0045893	positive regulation of transcription, DNA-templated	249/6713	381/13277	2.38607e-09	2.56094e-08	1.78741e-08	249
GO:0051254	positive regulation of RNA metabolic process	249/6713	381/13277	2.38607e-09	2.56094e-08	1.78741e-08	249
GO:1902680	positive regulation of RNA biosynthetic process	249/6713	381/13277	2.38607e-09	2.56094e-08	1.78741e-08	249
GO:1903508	positive regulation of nucleic acid-templated transcription	249/6713	381/13277	2.38607e-09	2.56094e-08	1.78741e-08	249
GO:0035670	plant-type ovary development	96/6713	126/13277	2.73031e-09	2.89081e-08	2.01764e-08	96
GO:0048481	plant ovule development	96/6713	126/13277	2.73031e-09	2.89081e-08	2.01764e-08	96
GO:0071555	cell wall organization	233/6713	354/13277	3.02113e-09	3.17725e-08	2.21755e-08	233
GO:0010604	positive regulation of macromolecule metabolic process	273/6713	424/13277	3.77128e-09	3.93973e-08	2.74973e-08	273
GO:0010557	positive regulation of macromolecule biosynthetic process	262/6713	405/13277	4.00788e-09	4.15917e-08	2.90288e-08	262
GO:0010628	positive regulation of gene expression	260/6713	402/13277	4.74683e-09	4.89361e-08	3.41549e-08	260
GO:0000272	polysaccharide catabolic process	41/6713	45/13277	6.72639e-09	6.88906e-08	4.8082e-08	41
GO:0006721	terpenoid metabolic process	148/6713	212/13277	7.65295e-09	7.78712e-08	5.435e-08	148
GO:0048366	leaf development	236/6713	362/13277	8.67434e-09	8.76948e-08	6.12064e-08	236
GO:0016226	iron-sulfur cluster assembly	72/6713	91/13277	1.61325e-08	1.61017e-07	1.12381e-07	72
GO:0031163	metallo-sulfur cluster assembly	72/6713	91/13277	1.61325e-08	1.61017e-07	1.12381e-07	72
GO:0007167	enzyme linked receptor protein signaling pathway	79/6713	102/13277	1.91351e-08	1.88584e-07	1.31621e-07	79
GO:0007169	transmembrane receptor protein tyrosine kinase signaling pathway	79/6713	102/13277	1.91351e-08	1.88584e-07	1.31621e-07	79
GO:0045229	external encapsulating structure organization	237/6713	368/13277	3.92489e-08	3.84394e-07	2.68287e-07	237
GO:0051607	defense response to virus	101/6713	138/13277	4.21317e-08	4.10064e-07	2.86203e-07	101
GO:0034762	regulation of transmembrane transport	75/6713	97/13277	4.98484e-08	4.79217e-07	3.34469e-07	75
GO:0034765	regulation of ion transmembrane transport	75/6713	97/13277	4.98484e-08	4.79217e-07	3.34469e-07	75
GO:0009616	virus induced gene silencing	72/6713	93/13277	8.40103e-08	7.93037e-07	5.53498e-07	72
GO:0052018	modulation by symbiont of RNA levels in host	72/6713	93/13277	8.40103e-08	7.93037e-07	5.53498e-07	72
GO:0052249	modulation of RNA levels in other organism involved in symbiotic interaction	72/6713	93/13277	8.40103e-08	7.93037e-07	5.53498e-07	72
GO:0098586	cellular response to virus	72/6713	94/13277	1.81553e-07	1.70355e-06	1.18899e-06	72
GO:0042743	hydrogen peroxide metabolic process	193/6713	296/13277	1.92558e-07	1.79606e-06	1.25356e-06	193
GO:0006546	glycine catabolic process	40/6713	46/13277	2.18137e-07	2.02261e-06	1.41168e-06	40
GO:0048646	anatomical structure formation involved in morphogenesis	150/6713	223/13277	2.66229e-07	2.45401e-06	1.71277e-06	150
GO:1901607	alpha-amino acid biosynthetic process	220/6713	344/13277	2.69477e-07	2.46942e-06	1.72352e-06	220
GO:0010267	production of ta-siRNAs involved in RNA interference	76/6713	101/13277	3.01459e-07	2.74643e-06	1.91687e-06	76
GO:0009914	hormone transport	69/6713	90/13277	3.07073e-07	2.7765e-06	1.93785e-06	69
GO:1901657	glycosyl compound metabolic process	138/6713	203/13277	3.08303e-07	2.7765e-06	1.93785e-06	138
GO:0009944	polarity specification of adaxial/abaxial axis	48/6713	58/13277	3.28981e-07	2.94579e-06	2.05601e-06	48
GO:0007166	cell surface receptor signaling pathway	79/6713	106/13277	3.5315e-07	3.14424e-06	2.19451e-06	79
GO:0031324	negative regulation of cellular metabolic process	262/6713	419/13277	3.60169e-07	3.18862e-06	2.22549e-06	262
GO:0000281	mitotic cytokinesis	130/6713	190/13277	3.84758e-07	3.38717e-06	2.36407e-06	130
GO:0009071	serine family amino acid catabolic process	41/6713	48/13277	4.3892e-07	3.82105e-06	2.66689e-06	41
GO:0042135	neurotransmitter catabolic process	41/6713	48/13277	4.3892e-07	3.82105e-06	2.66689e-06	41
GO:0000910	cytokinesis	131/6713	192/13277	4.44752e-07	3.82927e-06	2.67263e-06	131
GO:0061640	cytoskeleton-dependent cytokinesis	131/6713	192/13277	4.44752e-07	3.82927e-06	2.67263e-06	131
GO:0060918	auxin transport	68/6713	89/13277	4.70027e-07	4.02477e-06	2.80908e-06	68
GO:0006346	methylation-dependent chromatin silencing	76/6713	102/13277	5.98122e-07	5.09379e-06	3.5552e-06	76
GO:0072593	reactive oxygen species metabolic process	210/6713	329/13277	6.18142e-07	5.23583e-06	3.65434e-06	210
GO:0045814	negative regulation of gene expression, epigenetic	145/6713	217/13277	7.64956e-07	6.44455e-06	4.49796e-06	145
GO:0009926	auxin polar transport	65/6713	85/13277	7.96089e-07	6.67097e-06	4.65599e-06	65
GO:0009943	adaxial/abaxial axis specification	48/6713	59/13277	8.97265e-07	7.43923e-06	5.19219e-06	48
GO:0065001	specification of axis polarity	48/6713	59/13277	8.97265e-07	7.43923e-06	5.19219e-06	48
GO:0006342	chromatin silencing	143/6713	214/13277	9.07292e-07	7.48277e-06	5.22258e-06	143
GO:0040029	regulation of gene expression, epigenetic	205/6713	322/13277	1.09981e-06	9.02305e-06	6.29762e-06	205
GO:0048532	anatomical structure arrangement	145/6713	218/13277	1.15067e-06	9.39116e-06	6.55454e-06	145
GO:0003002	regionalization	125/6713	184/13277	1.16057e-06	9.4229e-06	6.5767e-06	125
GO:1905393	plant organ formation	116/6713	169/13277	1.25034e-06	1.00994e-05	7.04887e-06	116
GO:0016458	gene silencing	216/6713	342/13277	1.34664e-06	1.08215e-05	7.55282e-06	216
GO:0008361	regulation of cell size	41/6713	49/13277	1.37063e-06	1.09581e-05	7.64815e-06	41
GO:0042546	cell wall biogenesis	177/6713	274/13277	1.51809e-06	1.20753e-05	8.42795e-06	177
GO:0051225	spindle assembly	34/6713	39/13277	1.63417e-06	1.29331e-05	9.02662e-06	34
GO:0051172	negative regulation of nitrogen compound metabolic process	250/6713	403/13277	1.65694e-06	1.30474e-05	9.1064e-06	250
GO:0009790	embryo development	294/6713	482/13277	1.74303e-06	1.36566e-05	9.53162e-06	294
GO:0000911	cytokinesis by cell plate formation	125/6713	185/13277	1.80401e-06	1.39255e-05	9.71929e-06	125
GO:0032506	cytokinetic process	125/6713	185/13277	1.80401e-06	1.39255e-05	9.71929e-06	125
GO:1902410	mitotic cytokinetic process	125/6713	185/13277	1.80401e-06	1.39255e-05	9.71929e-06	125
GO:0009933	meristem structural organization	142/6713	214/13277	1.81686e-06	1.3956e-05	9.74053e-06	142
GO:0045934	negative regulation of nucleobase-containing compound metabolic process	218/6713	347/13277	2.10517e-06	1.60917e-05	1.12312e-05	218
GO:0009832	plant-type cell wall biogenesis	96/6713	137/13277	2.47167e-06	1.88015e-05	1.31224e-05	96
GO:0009106	lipoate metabolic process	33/6713	38/13277	2.83664e-06	2.14735e-05	1.49874e-05	33
GO:0048440	carpel development	116/6713	171/13277	3.11362e-06	2.34569e-05	1.63717e-05	116
GO:1902903	regulation of supramolecular fiber organization	75/6713	103/13277	3.16899e-06	2.37599e-05	1.65831e-05	75
GO:0010050	vegetative phase change	49/6713	62/13277	3.45529e-06	2.5783e-05	1.79952e-05	49
GO:0009793	embryo development ending in seed dormancy	286/6713	471/13277	4.07765e-06	3.02829e-05	2.11359e-05	286
GO:0035821	modification of morphology or physiology of other organism	74/6713	102/13277	4.61326e-06	3.37803e-05	2.35769e-05	74
GO:0044003	modification by symbiont of host morphology or physiology	74/6713	102/13277	4.61326e-06	3.37803e-05	2.35769e-05	74
GO:0051817	modification of morphology or physiology of other organism involved in symbiotic interaction	74/6713	102/13277	4.61326e-06	3.37803e-05	2.35769e-05	74
GO:0009798	axis specification	52/6713	67/13277	4.67519e-06	3.40745e-05	2.37823e-05	52
GO:1901605	alpha-amino acid metabolic process	284/6713	468/13277	4.73284e-06	3.4335e-05	2.3964e-05	284
GO:0008064	regulation of actin polymerization or depolymerization	72/6713	99/13277	5.34601e-06	3.77352e-05	2.63372e-05	72
GO:0030832	regulation of actin filament length	72/6713	99/13277	5.34601e-06	3.77352e-05	2.63372e-05	72
GO:0030833	regulation of actin filament polymerization	72/6713	99/13277	5.34601e-06	3.77352e-05	2.63372e-05	72
GO:0032956	regulation of actin cytoskeleton organization	72/6713	99/13277	5.34601e-06	3.77352e-05	2.63372e-05	72
GO:0032970	regulation of actin filament-based process	72/6713	99/13277	5.34601e-06	3.77352e-05	2.63372e-05	72
GO:0110053	regulation of actin filament organization	72/6713	99/13277	5.34601e-06	3.77352e-05	2.63372e-05	72
GO:0007623	circadian rhythm	104/6713	152/13277	5.478e-06	3.83216e-05	2.67465e-05	104
GO:0048511	rhythmic process	104/6713	152/13277	5.478e-06	3.83216e-05	2.67465e-05	104
GO:0042335	cuticle development	34/6713	40/13277	5.57819e-06	3.8849e-05	2.71146e-05	34
GO:0022900	electron transport chain	60/6713	80/13277	6.37673e-06	4.42138e-05	3.0859e-05	60
GO:0030041	actin filament polymerization	73/6713	101/13277	6.69229e-06	4.59948e-05	3.2102e-05	73
GO:0032271	regulation of protein polymerization	73/6713	101/13277	6.69229e-06	4.59948e-05	3.2102e-05	73
GO:0051253	negative regulation of RNA metabolic process	209/6713	335/13277	6.74151e-06	4.61308e-05	3.21969e-05	209
GO:0010310	regulation of hydrogen peroxide metabolic process	106/6713	156/13277	7.28661e-06	4.9644e-05	3.46489e-05	106
GO:0051701	interaction with host	79/6713	111/13277	7.44484e-06	5.05024e-05	3.52481e-05	79
GO:0000278	mitotic cell cycle	225/6713	364/13277	7.77637e-06	5.2524e-05	3.6659e-05	225
GO:0009955	adaxial/abaxial pattern specification	49/6713	63/13277	7.91444e-06	5.32045e-05	3.71339e-05	49
GO:0048467	gynoecium development	120/6713	180/13277	7.94502e-06	5.32045e-05	3.71339e-05	120
GO:0051193	regulation of cofactor metabolic process	117/6713	175/13277	8.35817e-06	5.5733e-05	3.88987e-05	117
GO:0071669	plant-type cell wall organization or biogenesis	183/6713	290/13277	9.16131e-06	6.08295e-05	4.24558e-05	183
GO:0098660	inorganic ion transmembrane transport	83/6713	118/13277	9.2457e-06	6.11308e-05	4.26661e-05	83
GO:0006305	DNA alkylation	108/6713	160/13277	9.54907e-06	6.24135e-05	4.35614e-05	108
GO:0006306	DNA methylation	108/6713	160/13277	9.54907e-06	6.24135e-05	4.35614e-05	108
GO:0010051	xylem and phloem pattern formation	59/6713	79/13277	9.55918e-06	6.24135e-05	4.35614e-05	59
GO:0051301	cell division	188/6713	299/13277	9.64535e-06	6.27148e-05	4.37717e-05	188
GO:0051493	regulation of cytoskeleton organization	75/6713	105/13277	1.01998e-05	6.60459e-05	4.60966e-05	75
GO:0098662	inorganic cation transmembrane transport	81/6713	115/13277	1.08773e-05	7.01432e-05	4.89563e-05	81
GO:0009411	response to UV	134/6713	205/13277	1.14093e-05	7.32718e-05	5.11399e-05	134
GO:0043254	regulation of protein complex assembly	73/6713	102/13277	1.19257e-05	7.6276e-05	5.32366e-05	73
GO:0042254	ribosome biogenesis	183/6713	291/13277	1.24288e-05	7.91705e-05	5.52569e-05	183
GO:0098655	cation transmembrane transport	82/6713	117/13277	1.30123e-05	8.25516e-05	5.76167e-05	82
GO:0010558	negative regulation of macromolecule biosynthetic process	212/6713	343/13277	1.42304e-05	8.95541e-05	6.25041e-05	212
GO:2000113	negative regulation of cellular macromolecule biosynthetic process	212/6713	343/13277	1.42304e-05	8.95541e-05	6.25041e-05	212
GO:1903047	mitotic cell cycle process	144/6713	223/13277	1.44041e-05	9.0285e-05	6.30142e-05	144
GO:0006304	DNA modification	108/6713	161/13277	1.4648e-05	9.1085e-05	6.35726e-05	108
GO:0044728	DNA methylation or demethylation	108/6713	161/13277	1.4648e-05	9.1085e-05	6.35726e-05	108
GO:0045892	negative regulation of transcription, DNA-templated	204/6713	329/13277	1.53285e-05	9.3894e-05	6.55331e-05	204
GO:1902679	negative regulation of RNA biosynthetic process	204/6713	329/13277	1.53285e-05	9.3894e-05	6.55331e-05	204
GO:1903507	negative regulation of nucleic acid-templated transcription	204/6713	329/13277	1.53285e-05	9.3894e-05	6.55331e-05	204
GO:0009890	negative regulation of biosynthetic process	218/6713	354/13277	1.53394e-05	9.3894e-05	6.55331e-05	218
GO:0009615	response to virus	109/6713	163/13277	1.65757e-05	0.000101067	7.05392e-05	109
GO:0007051	spindle organization	34/6713	41/13277	1.67438e-05	0.000101696	7.09784e-05	34
GO:0031327	negative regulation of cellular biosynthetic process	216/6713	351/13277	1.79035e-05	0.00010832	7.56016e-05	216
GO:0048449	floral organ formation	87/6713	126/13277	1.81467e-05	0.000109369	7.63336e-05	87
GO:2000377	regulation of reactive oxygen species metabolic process	114/6713	172/13277	1.98751e-05	0.000119326	8.32837e-05	114
GO:0032273	positive regulation of protein polymerization	68/6713	95/13277	2.33855e-05	0.000139866	9.76195e-05	68
GO:0022613	ribonucleoprotein complex biogenesis	185/6713	297/13277	2.55936e-05	0.000152491	0.000106431	185
GO:0048447	sepal morphogenesis	39/6713	49/13277	2.59337e-05	0.000152775	0.000106629	39
GO:0048451	petal formation	39/6713	49/13277	2.59337e-05	0.000152775	0.000106629	39
GO:0048453	sepal formation	39/6713	49/13277	2.59337e-05	0.000152775	0.000106629	39
GO:0007015	actin filament organization	90/6713	132/13277	2.84422e-05	0.000165841	0.000115748	90
GO:0044089	positive regulation of cellular component biogenesis	69/6713	97/13277	2.85749e-05	0.000165841	0.000115748	69
GO:0051495	positive regulation of cytoskeleton organization	69/6713	97/13277	2.85749e-05	0.000165841	0.000115748	69
GO:1902905	positive regulation of supramolecular fiber organization	69/6713	97/13277	2.85749e-05	0.000165841	0.000115748	69
GO:0042737	drug catabolic process	87/6713	127/13277	2.91562e-05	0.000168589	0.000117667	87
GO:0016246	RNA interference	107/6713	161/13277	2.96318e-05	0.00017071	0.000119146	107
GO:0048444	floral organ morphogenesis	97/6713	144/13277	3.03726e-05	0.000174336	0.000121678	97
GO:0030838	positive regulation of actin filament polymerization	67/6713	94/13277	3.34995e-05	0.000190886	0.000133229	67
GO:0045010	actin nucleation	67/6713	94/13277	3.34995e-05	0.000190886	0.000133229	67
GO:0008154	actin polymerization or depolymerization	73/6713	104/13277	3.52961e-05	0.000200395	0.000139865	73
GO:0090697	post-embryonic plant organ morphogenesis	120/6713	184/13277	3.74944e-05	0.000212107	0.00014804	120
GO:0006544	glycine metabolic process	40/6713	51/13277	3.8482e-05	0.000213834	0.000149245	40
GO:0048439	flower morphogenesis	40/6713	51/13277	3.8482e-05	0.000213834	0.000149245	40
GO:0048442	sepal development	40/6713	51/13277	3.8482e-05	0.000213834	0.000149245	40
GO:0048446	petal morphogenesis	40/6713	51/13277	3.8482e-05	0.000213834	0.000149245	40
GO:0048464	flower calyx development	40/6713	51/13277	3.8482e-05	0.000213834	0.000149245	40
GO:0010608	posttranscriptional regulation of gene expression	152/6713	240/13277	3.88084e-05	0.000214886	0.000149979	152
GO:0031334	positive regulation of protein complex assembly	68/6713	96/13277	4.06864e-05	0.000224491	0.000156683	68
GO:0044087	regulation of cellular component biogenesis	77/6713	111/13277	4.20124e-05	0.000230994	0.000161222	77
GO:0001505	regulation of neurotransmitter levels	45/6713	59/13277	4.49059e-05	0.000245183	0.000171125	45
GO:0042133	neurotransmitter metabolic process	45/6713	59/13277	4.49059e-05	0.000245183	0.000171125	45
GO:0009765	photosynthesis, light harvesting	18/6713	19/13277	4.57005e-05	0.000248655	0.000173548	18
GO:0030036	actin cytoskeleton organization	92/6713	137/13277	5.77769e-05	0.000313275	0.00021865	92
GO:0007267	cell-cell signaling	51/6713	69/13277	6.1452e-05	0.000332053	0.000231755	51
GO:0030029	actin filament-based process	118/6713	183/13277	9.07671e-05	0.00048877	0.000341136	118
GO:0032879	regulation of localization	116/6713	180/13277	0.000107439	0.000576566	0.000402413	116
GO:0019216	regulation of lipid metabolic process	32/6713	40/13277	0.000117278	0.000627217	0.000437765	32
GO:0048443	stamen development	81/6713	120/13277	0.000120092	0.000637915	0.000445231	81
GO:0048466	androecium development	81/6713	120/13277	0.000120092	0.000637915	0.000445231	81
GO:0046777	protein autophosphorylation	88/6713	132/13277	0.000123845	0.000655624	0.000457591	88
GO:0031047	gene silencing by RNA	168/6713	273/13277	0.000147279	0.000777057	0.000542345	168
GO:0000038	very long-chain fatty acid metabolic process	33/6713	42/13277	0.000174928	0.000917171	0.000640138	33
GO:0055082	cellular chemical homeostasis	126/6713	199/13277	0.000175006	0.000917171	0.000640138	126
GO:0016441	posttranscriptional gene silencing	114/6713	178/13277	0.000178776	0.000933808	0.000651749	114
GO:0006633	fatty acid biosynthetic process	85/6713	128/13277	0.000196713	0.00102408	0.000714755	85
GO:0009664	plant-type cell wall organization	124/6713	196/13277	0.000206324	0.00107056	0.000747198	124
GO:0044403	symbiont process	82/6713	123/13277	0.00020796	0.00107549	0.000750635	82
GO:0007155	cell adhesion	60/6713	86/13277	0.000224803	0.00115497	0.00080611	60
GO:0022610	biological adhesion	60/6713	86/13277	0.000224803	0.00115497	0.00080611	60
GO:0006873	cellular ion homeostasis	121/6713	191/13277	0.000225627	0.00115541	0.000806419	121
GO:0030003	cellular cation homeostasis	117/6713	184/13277	0.000228143	0.0011645	0.000812758	117
GO:0019725	cellular homeostasis	135/6713	216/13277	0.000244019	0.00124148	0.000866491	135
GO:0035194	posttranscriptional gene silencing by RNA	110/6713	172/13277	0.000249969	0.00126469	0.000882689	110
GO:0070925	organelle assembly	34/6713	44/13277	0.000250194	0.00126469	0.000882689	34
GO:0009887	animal organ morphogenesis	64/6713	93/13277	0.000261887	0.00131954	0.000920972	64
GO:0034220	ion transmembrane transport	103/6713	160/13277	0.000270821	0.00136018	0.000949336	103
GO:0009595	detection of biotic stimulus	62/6713	90/13277	0.000310813	0.00155605	0.00108604	62
GO:0010304	PSII associated light-harvesting complex II catabolic process	22/6713	26/13277	0.000323611	0.00161496	0.00112716	22
GO:0010089	xylem development	45/6713	62/13277	0.000333466	0.00165886	0.0011578	45
GO:0071368	cellular response to cytokinin stimulus	40/6713	54/13277	0.000352294	0.00174698	0.0012193	40
GO:0051049	regulation of transport	96/6713	149/13277	0.000412022	0.00203671	0.00142152	96
GO:0031408	oxylipin biosynthetic process	17/6713	19/13277	0.000428297	0.00210994	0.00147263	17
GO:0006766	vitamin metabolic process	61/6713	89/13277	0.000429528	0.00210994	0.00147263	61
GO:0009739	response to gibberellin	78/6713	118/13277	0.000440411	0.00215664	0.00150522	78
GO:0051606	detection of stimulus	82/6713	125/13277	0.000459384	0.00224254	0.00156518	82
GO:0001708	cell fate specification	29/6713	37/13277	0.000471393	0.00229401	0.0016011	29
GO:0051567	histone H3-K9 methylation	102/6713	160/13277	0.000488477	0.00236248	0.00164889	102
GO:0061647	histone H3-K9 modification	102/6713	160/13277	0.000488477	0.00236248	0.00164889	102
GO:0030422	production of siRNA involved in RNA interference	83/6713	127/13277	0.000509025	0.00245428	0.00171296	83
GO:0009736	cytokinin-activated signaling pathway	39/6713	53/13277	0.000523178	0.00251478	0.00175519	39
GO:0010109	regulation of photosynthesis	21/6713	25/13277	0.000546948	0.002621	0.00182932	21
GO:0043269	regulation of ion transport	84/6713	129/13277	0.000562217	0.00268596	0.00187466	84
GO:0009073	aromatic amino acid family biosynthetic process	63/6713	93/13277	0.000570601	0.00271772	0.00189683	63
GO:0010638	positive regulation of organelle organization	89/6713	138/13277	0.000627543	0.00297988	0.0020798	89
GO:0044419	interspecies interaction between organisms	82/6713	126/13277	0.000667789	0.0031614	0.00220649	82
GO:0048441	petal development	46/6713	65/13277	0.000725611	0.00341451	0.00238315	46
GO:0048465	corolla development	46/6713	65/13277	0.000725611	0.00341451	0.00238315	46
GO:0010026	trichome differentiation	95/6713	149/13277	0.000745086	0.00349566	0.00243979	95
GO:0009617	response to bacterium	283/6713	491/13277	0.000800345	0.0037437	0.00261291	283
GO:0015672	monovalent inorganic cation transport	105/6713	167/13277	0.000841493	0.00392446	0.00273907	105
GO:0009932	cell tip growth	114/6713	183/13277	0.000852476	0.00396389	0.00276659	114
GO:0055080	cation homeostasis	133/6713	217/13277	0.000869816	0.00403255	0.00281451	133
GO:0051130	positive regulation of cellular component organization	89/6713	139/13277	0.000885061	0.00409112	0.00285539	89
GO:0006733	oxidoreduction coenzyme metabolic process	229/6713	392/13277	0.000922143	0.00425	0.00296627	229
GO:0009740	gibberellic acid mediated signaling pathway	39/6713	54/13277	0.000967474	0.00441992	0.00308487	39
GO:0016572	histone phosphorylation	39/6713	54/13277	0.000967474	0.00441992	0.00308487	39
GO:0048508	embryonic meristem development	39/6713	54/13277	0.000967474	0.00441992	0.00308487	39
GO:0022402	cell cycle process	278/6713	483/13277	0.000994212	0.00452734	0.00315985	278
GO:0016999	antibiotic metabolic process	238/6713	409/13277	0.000996766	0.00452734	0.00315985	238
GO:0044036	cell wall macromolecule metabolic process	147/6713	243/13277	0.00106503	0.00482341	0.00336649	147
GO:0033043	regulation of organelle organization	132/6713	216/13277	0.00107033	0.00483344	0.00337349	132
GO:0032544	plastid translation	10/6713	10/13277	0.00108824	0.00490023	0.0034201	10
GO:0031050	dsRNA processing	84/6713	131/13277	0.0011415	0.00511065	0.00356697	84
GO:0070918	production of small RNA involved in gene silencing by RNA	84/6713	131/13277	0.0011415	0.00511065	0.00356697	84
GO:0010087	phloem or xylem histogenesis	55/6713	81/13277	0.00114781	0.00512429	0.00357649	55
GO:0045165	cell fate commitment	32/6713	43/13277	0.0012009	0.00534603	0.00373125	32
GO:0009741	response to brassinosteroid	59/6713	88/13277	0.00125226	0.00555889	0.00387981	59
GO:0010015	root morphogenesis	198/6713	337/13277	0.00135404	0.00599372	0.0041833	198
GO:0072511	divalent inorganic cation transport	113/6713	183/13277	0.00141161	0.00621915	0.00434064	113
GO:0006084	acetyl-CoA metabolic process	50/6713	73/13277	0.0014129	0.00621915	0.00434064	50
GO:0050801	ion homeostasis	143/6713	237/13277	0.00143237	0.00628716	0.00438811	143
GO:0060429	epithelium development	21/6713	26/13277	0.00148496	0.00649982	0.00453654	21
GO:0008356	asymmetric cell division	17/6713	20/13277	0.00150137	0.00655331	0.00457387	17
GO:0090696	post-embryonic plant organ development	145/6713	241/13277	0.00156726	0.00682193	0.00476135	145
GO:0010090	trichome morphogenesis	88/6713	139/13277	0.00157516	0.00683735	0.00477211	88
GO:0035196	production of miRNAs involved in gene silencing by miRNA	76/6713	118/13277	0.00160065	0.00692877	0.00483592	76
GO:0010476	gibberellin mediated signaling pathway	39/6713	55/13277	0.00171014	0.00738233	0.00515248	39
GO:0070838	divalent metal ion transport	112/6713	182/13277	0.00175127	0.0075391	0.0052619	112
GO:0044550	secondary metabolite biosynthetic process	149/6713	249/13277	0.00186049	0.00798738	0.00557477	149
GO:0045491	xylan metabolic process	92/6713	147/13277	0.0020992	0.00898757	0.00627286	92
GO:0071478	cellular response to radiation	47/6713	69/13277	0.00232201	0.00988748	0.00690094	47
GO:0071482	cellular response to light stimulus	47/6713	69/13277	0.00232201	0.00988748	0.00690094	47

## Sheet: GO_MF_Protoplast_Leaf0h.UP
ID	Description	GeneRatio	BgRatio	pvalue	p.adjust	qvalue	Count
GO:0003735	structural constituent of ribosome	167/6303	211/12626	1.02241e-18	4.66218e-16	4.27259e-16	167
GO:0005198	structural molecule activity	193/6303	272/12626	8.64989e-13	1.97217e-10	1.80737e-10	193
GO:0003723	RNA binding	243/6303	401/12626	8.17608e-06	0.00124276	0.00113891	243
GO:0008565	protein transporter activity	62/6303	87/12626	4.035e-05	0.0045999	0.00421552	62
GO:0003743	translation initiation factor activity	42/6303	55/12626	5.24066e-05	0.00477948	0.00438009	42
GO:0050897	cobalt ion binding	32/6303	40/12626	8.56466e-05	0.00650914	0.00596521	32
GO:0005507	copper ion binding	95/6303	146/12626	0.000145629	0.00797208	0.0073059	95
GO:0001882	nucleoside binding	81/6303	123/12626	0.000244757	0.00797208	0.0073059	81
GO:0001883	purine nucleoside binding	81/6303	123/12626	0.000244757	0.00797208	0.0073059	81
GO:0005525	GTP binding	81/6303	123/12626	0.000244757	0.00797208	0.0073059	81
GO:0019001	guanyl nucleotide binding	81/6303	123/12626	0.000244757	0.00797208	0.0073059	81
GO:0032549	ribonucleoside binding	81/6303	123/12626	0.000244757	0.00797208	0.0073059	81
GO:0032550	purine ribonucleoside binding	81/6303	123/12626	0.000244757	0.00797208	0.0073059	81
GO:0032561	guanyl ribonucleotide binding	81/6303	123/12626	0.000244757	0.00797208	0.0073059	81
GO:0016667	oxidoreductase activity, acting on a sulfur group of donors	33/6303	43/12626	0.000285828	0.00868918	0.00796308	33

## Sheet: GO_MF_Protoplast_Leaf0h.DW
ID	Description	GeneRatio	BgRatio	pvalue	p.adjust	qvalue	Count
GO:0004672	protein kinase activity	270/6323	420/12626	1.69947e-09	7.78356e-07	7.22721e-07	270
GO:0004674	protein serine/threonine kinase activity	186/6323	281/12626	2.53799e-08	5.81199e-06	5.39656e-06	186
GO:0016168	chlorophyll binding	21/6323	22/12626	5.576e-06	0.000851269	0.000790422	21
GO:0003774	motor activity	51/6323	68/12626	2.24827e-05	0.00257427	0.00239027	51
GO:0015631	tubulin binding	34/6323	43/12626	8.64698e-05	0.00792063	0.00735448	34

[truncated: 9 more sheets: GO_CC_Protoplast_Leaf0.UP, GO_CC_Protoplast_Leaf0h.DW, GO_BP_Protoplast_Leaf3h.UP, GO_BP_Protoplast_Leaf3h.DW, GO_MF_Protoplast_Leaf3h.UP, GO_MF_Protoplast_Leaf3h.DW, GO_CC_Protoplast_Leaf3h.UP, GO_CC_Protoplast_Leaf3h.DW, Sheet1]
