# Supplementary material for: Catabolic reprogramming of Brassica rapa leaf mesophyll protoplasts during the isolation procedure.
Source: Research Square preprint supplement (doi:10.21203/rs.3.rs-1533265/v1), 2022-04-18
Supplement: Supplementary file 3 [file f9e0beae7e5e43c35f9c4633.xlsx]

## Sheet: GC-MS Normalized data
Numbering for matrix	Numbering for unique peaks	IIS_I_A_or_U	I_A_M_or_P	kegg_compound	final annotation	RI	Win	fData::lineno	fData::query	fData::known	fData::cas	fData::preferred	fData::action	Leaf0h_1	Leaf0h_2	Leaf0h_3	Leaf0h_4	Leaf0h_5	Leaf0h_6	Leaf3h_1	Leaf3h_2	Leaf3h_3	Leaf3h_4	Leaf3h_5	Leaf3h_6	Leaf6h_1	Leaf6h_2	Leaf6h_3	Leaf6h_4	Leaf6h_5	Leaf6h_6	Protoplast_1	Protoplast_2	Protoplast_3	Protoplast_4	Protoplast_5	Protoplast_6
BokchoyProtoplast01_ID001	BokchoyProtoplast01_cmb_ID001	U				989.9	231.42 Win001_C01	2		FALSE	0	0		17.5272	7.55344	5.82155	15.7944	12.2801	1.24975	0.587398	0.571869	1.46865	0.611574	0.540993	0.45552	0.281009	0.191123	1.09875	0.0389635	0.060564	0.0543941	0.120295	0.0364275	15.5494	5.74406	0.54576	0.0664912
BokchoyProtoplast01_ID002	BokchoyProtoplast01_cmb_ID002	U				993.4	232.82 Win001_C02	3		FALSE	0	0		0.0687175	0.00499427	0.00197286	0.360696	0.463125	0.0213787	0.0118003	0.099263	0.0411882	0.102338	0.025824	0.0436985	0.0253999	0.0207057	0.0429796	0.0265234	0.535474	0.120827	0.0478047	0.0562174	0.00975749	0.320205	0.0303692	0.190958
BokchoyProtoplast01_ID003	BokchoyProtoplast01_cmb_ID003	U				997.7	234.45 Win001_C03	4		FALSE	0	0		5.05538	5.7847	6.00415	6.01407	5.59039	1.72551	1.15242	1.2197	1.09356	1.33622	1.8645	1.92284	0.72329	0.606126	0.818053	31.704	31.4714	41.8591	11.0977	16.1081	4.9719	6.83508	1.0029	132.761
BokchoyProtoplast01_ID004	BokchoyProtoplast01_cmb_ID004	U				999.7	235.34 Win001_C04	5		FALSE	0	0		2.23854	1.75607	4.33511	8.21244	2.06879	0.84157	0.562724	0.617193	0.439384	0.525662	0.600992	0.382268	0.246968	0.343706	0.419434	2.38222	2.13769	2.20598	2.02013	1.36086	1.67409	4.46395	0.300076	6.18796
BokchoyProtoplast01_ID005	BokchoyProtoplast01_cmb_ID005	U				1004.2	237.13 Win001_C05	6		FALSE	0	0		16.683	14.5722	20.6599	44.6631	12.0318	5.74082	2.86046	3.07208	3.24933	2.52598	2.98854	1.8812	1.01244	2.05661	2.09343	27.8642	26.9602	33.1869	16.0147	15.3889	9.4369	25.1756	1.67411	82.1826
BokchoyProtoplast01_ID006	BokchoyProtoplast01_cmb_ID006	U				1009.3	239.06 Win001_C06	7		FALSE	0	0		0.374517	1.33764	1.05772	0.621982	2.78693	0.383003	0.251651	0.225716	0.125415	0.249795	0.054846	0.173099	0.107266	0.275264	0.134888	0.256159	2.51735	0.598785	0.132841	0.320374	0.455043	0.863155	0.0921935	3.14955
BokchoyProtoplast01_ID008	BokchoyProtoplast01_cmb_ID008	U				1026.6	245.97 Win002_C02	9		FALSE	0	0		0.362202	0.238218	1.56274	3.06542	0.433028	0.117736	0.0911123	0.159866	0.226636	0.0856738	0.257162	0.0897858	0.0459946	0.0653342	0.203502	13.337	11.885	30.3575	6.34414	8.30789	0.31634	1.65958	0.0494555	29.7245
BokchoyProtoplast01_ID009	BokchoyProtoplast01_cmb_ID009	U				1036.9	250.05 Win003_C01	10		FALSE	0	0		75.2432	65.6381	64.4516	125.426	32.0118	15.768	6.60332	9.29562	8.58757	4.45437	8.36617	3.04448	3.38409	2.75489	6.98581	56.0473	28.0326	52.9624	36.3762	26.2056	60.1485	89.1836	4.23952	130.19
BokchoyProtoplast01_ID010	BokchoyProtoplast01_cmb_ID010	U				1042.9	252.47 Win003_C02	11		FALSE	0	0		19.341	15.062	21.3362	36.619	9.70805	5.05239	2.51157	2.47298	3.05468	2.28909	3.97828	1.53328	1.04351	1.49635	1.90312	42.9323	31.0989	39.0145	38.8636	23.5938	13.85	23.6124	1.55956	102.272
BokchoyProtoplast01_ID011	BokchoyProtoplast01_cmb_ID011	A2			Tetrasiloxane, decamethyl-	1045.1	253.44 Win003_C03	12	Tetrasiloxane, decamethyl-	TRUE	0	0		1.27813	1.21235	1.41945	2.17247	10.2057	0.857999	0.218331	0.546052	0.417502	0.205298	0.315112	0.152286	0.171301	0.0545533	0.964729	17.3666	9.82485	45.2343	6.27108	8.64649	1.34948	1.52151	0.128606	39.72
BokchoyProtoplast01_ID012	BokchoyProtoplast01_cmb_ID012	U				1049.2	255.03 Win003_C04	13		FALSE	0	0		0.797038	0.283218	0.906566	0.973388	0.261544	0.19041	0.104857	0.0660248	0.0959137	0.116343	0.0641862	0.0581028	0.0459741	0.0451501	0.0468456	0.708288	0.0778526	0.147819	0.432403	0.156997	0.174622	1.24225	0.0748903	1.06425
BokchoyProtoplast01_ID013	BokchoyProtoplast01_cmb_ID013	I		C00186	Lactic acid, DL- (2TMS)	1052.7	256.36 Win004_C01	14	Lactic acid, DL- (2TMS)	TRUE	10326-41-7|598-82-3|50-21-5|17596-96-2|79-33-4	lactic acid		166.512	64.2018	67.5977	389.388	21.3565	7.13106	2.9357	2.99413	6.35822	3.67399	13.1869	1.3434	1.27301	3.24582	11.8235	369.931	178.682	606.047	317.645	210.103	138.951	89.8567	2.92915	465.068
BokchoyProtoplast01_ID014	BokchoyProtoplast01_cmb_ID014	U				1055.7	257.62 Win004_C02	15		FALSE	0	0		23.8572	16.3573	14.891	18.4933	4.53453	2.40135	0.419129	1.4251	1.23923	0.676779	0.793134	0.343796	0.969441	0.416914	1.29713	3.53066	0.456514	1.40697	2.56302	1.02665	23.6121	16.3586	0.450606	4.81798
BokchoyProtoplast01_ID015	BokchoyProtoplast01_cmb_ID015	I		C00160	Glycolic acid (2TMS)	1068.5	262.66 Win005_C01	16	Glycolic acid (2TMS)	TRUE	33581-77-0|996-23-6|79-14-1	glycolic acid		15.0326	10.1203	7.77757	14.9084	3.75305	1.3487	1.45538	0.529956	1.16206	0.987081	1.73798	0.34797	0.227957	0.0833444	1.02125	1.43381	0.758855	0.292629	0.841639	0.582047	16.0062	5.39432	0.449861	19.1021
BokchoyProtoplast01_ID016	BokchoyProtoplast01_cmb_ID016	U				1082	268.11 Win005_C02	17		FALSE	0	0		47.5568	47.708	43.3387	65.0439	42.4521	14.2592	5.57612	5.74323	5.36386	4.29996	4.58237	2.77708	3.01846	1.83766	4.90003	91.8489	43.8114	79.351	28.8105	34.6639	36.0553	38.0537	2.81757	334.844
BokchoyProtoplast01_ID017	BokchoyProtoplast01_cmb_ID017	U				1086.1	269.74 Win005_C03	18		FALSE	0	0		0.00458703	0.0101302	0.00621489	0.015079	0.0068054	0.00146318	0.000477855	0.000486148	0.000579729	5.55e-05	0.000952657	0.000298019	0.000431856	0.000389285	0.0170492	0.0414597	0.0141808	0.0441891	0.0652142	0.0219193	0.00412347	0.0114148	0.000304663	0.0470172
BokchoyProtoplast01_ID018	BokchoyProtoplast01_cmb_ID018	I		C00041	Alanine (2TMS)	1095.6	273.49 Win006_C01	19	Alanine (2TMS)	TRUE	2899-44-7|302-72-7|6898-94-8|56-41-7|27844-07-1|338-69-2	l-alanine		14326.5	7102.54	13968.7	22702.5	6357.57	2840.85	1583.17	1967.58	2670.34	1046.35	3738.45	906.079	1172.65	1711.46	1585.73	26602.4	28494.1	68793	38672.3	21570.1	5265.11	22075.9	1501.04	27896.7
BokchoyProtoplast01_ID019	BokchoyProtoplast01_cmb_ID019	U				1098.6	274.68 Win006_C02	20		FALSE	0	0		157.697	142.84	156.405	237.224	96.9068	39.6954	14.5796	19.8414	27.4307	12.6765	21.4051	8.18727	12.4187	8.89487	13.2955	386.624	179.863	384.906	211.69	170.351	85.4715	183.211	12.8422	866.679
BokchoyProtoplast01_ID020	BokchoyProtoplast01_cmb_ID020	U				1106.1	277.44 Win006_C03	21		FALSE	0	0		4.00295	4.70378	5.40028	7.72263	3.78868	1.88441	0.431538	0.638087	0.958924	0.565563	0.647637	0.404608	0.334293	0.41821	0.348148	20.6299	11.3114	18.4278	12.4359	9.11223	3.90882	4.5455	0.442444	48.1224
BokchoyProtoplast01_ID021	BokchoyProtoplast01_cmb_ID021	I		C00192	Hydroxylamine (3TMS)	1114	280.23 Win007_C01	22	Hydroxylamine (3TMS)	TRUE	7803-49-8|5470-11-1|21023-20-1	hydroxylamine		33.3485	24.9888	38.5834	60.7931	20.7405	6.8925	3.33454	3.98361	3.89597	3.60124	5.52534	2.04375	1.54298	1.21476	4.6933	44.5721	44.4709	70.5207	27.2837	28.4992	41.648	39.3456	2.16424	135.38
BokchoyProtoplast01_ID022	BokchoyProtoplast01_cmb_ID022	U				1121.3	282.82 Win007_C02	23		FALSE	0	0		0.00448196	0.000945129	0.12431	0.000882063	0.00445659	0.000142337	0.00287509	0.00216141	5.15e-05	9.54e-05	0.00148101	0.000730833	0.0149261	0.000200628	0.000717383	0.00212663	0.000267508	0.000261485	0.0020218	0.000701944	3.98e-05	0.0141034	0.000173476	0
BokchoyProtoplast01_ID023	BokchoyProtoplast01_cmb_ID023	U				1129.2	285.57 Win007_C03	24		FALSE	0	0		0.298174	0.711561	0.932628	1.2608	1.21987	0.348306	0.118095	0.440747	0.170351	0.0675496	0.210554	0.144483	0.142395	0.030564	0.317032	0.309816	1.2339	0.848243	0.18008	0.314055	0.572712	0.515419	0.0652004	2.75217
BokchoyProtoplast01_ID024	BokchoyProtoplast01_cmb_ID024	A2			1,3-Bis(1,1-dimethylethyl)-1,1,3,3-tetramethyldisiloxane	1131.7	286.5 Win007_C04	25	1,3-Bis(1,1-dimethylethyl)-1,1,3,3-tetramethyldisiloxane	TRUE	0	0		2.25536	1.80569	4.58945	6.94642	2.66058	0.719226	0.383166	0.445292	0.64769	0.655311	0.727651	0.385215	0.32826	0.385805	0.723923	21.5436	7.51481	15.195	11.6211	8.61377	4.98654	8.35535	0.509793	45.8104
BokchoyProtoplast01_ID025	BokchoyProtoplast01_cmb_ID025	A2		C00209	Oxalic acid (2TMS)	1133.7	287.17 Win007_C05	26	Oxalic acid (2TMS)	TRUE	144-62-7|18294-04-7|6153-56-6	oxalic acid		429.317	431.677	454.522	767.365	272.045	162.413	85.3445	78.0767	46.9683	35.9033	53.9934	28.632	18.3535	21.1397	32.5754	327.534	243.152	391.743	182.453	155.28	129.234	214.895	16.9816	829.877
BokchoyProtoplast01_ID026	BokchoyProtoplast01_cmb_ID026	U				1134	287.3 Win007_C06	27		FALSE	0	0		12.7074	13.9942	15.7821	22.3513	10.0284	6.18718	3.21977	2.96628	1.23716	1.00547	1.41678	0.80565	0.460806	0.529573	0.85636	4.4511	3.22605	4.36679	2.0966	1.92681	2.52423	4.41062	0.333403	14.6375
BokchoyProtoplast01_ID027	BokchoyProtoplast01_cmb_ID027	U				1139.6	289.29 Win007_C07	28		FALSE	0	0		5.7132	6.46962	8.47073	11.9891	4.60535	1.56161	0.89193	1.35719	1.30901	0.582886	1.49933	0.81164	0.499223	0.656722	1.16637	12.7574	10.1936	15.1677	8.57183	7.06802	6.1663	8.41058	0.534617	34.4039
BokchoyProtoplast01_ID028	BokchoyProtoplast01_cmb_ID028	A2			Butyro-1,4-lactam (1TMS)	1145	291.18 Win008_C01	29	Butyro-1,4-lactam (1TMS)	TRUE	14468-90-7|616-45-5	1081:butyro-1,4-lactam (1tms)		1.19836	1.64454	1.39548	5.58477	1.57029	0.455259	0.305957	0.235932	0.560421	0.241583	0.600877	0.185963	0.169337	0.174631	0.402743	4.74704	3.76016	12.8246	7.81075	3.29454	1.37081	2.45784	0.237387	3.49654
BokchoyProtoplast01_ID029	BokchoyProtoplast01_cmb_ID029	A2			Pentasiloxane, dodecamethyl-	1156.8	295.43 Win008_C02	30	Pentasiloxane, dodecamethyl-	TRUE	0	0		0.909348	1.58941	6.23604	1.11943	127.14	0.865239	0.521649	0.00162375	0.0353566	0.0510134	0.401714	0.00503945	1.0615	0.0280569	3.15953	70.6492	26.6424	75.5878	47.1716	39.2666	1.09728	0.489904	0.790166	221.099
BokchoyProtoplast01_ID030	BokchoyProtoplast01_cmb_ID030	U				1158.2	295.93 Win008_C03	31		FALSE	0	0		2.94483	1.33011	6.7546	1.0036	9.29344	1.07196	0.534973	0.275915	0.0891909	0.34581	0.586844	0.241126	1.08682	0.0938977	0.907895	0.0046492	0.00519018	0.0114818	0.00297516	0.00365507	1.31703	4.05947	0.579027	0.0112963
BokchoyProtoplast01_ID031	BokchoyProtoplast01_cmb_ID031	U				1165.3	298.35 Win008_C04	32		FALSE	0	0		1.30396	1.25681	1.86575	1.8196	1.32217	0.257901	0.132372	0.243036	0.171408	0.120304	0.252722	0.121122	0.11713	0.0746912	0.190685	0.563252	1.3397	1.44099	0.805883	0.59693	0.620554	1.099	0.103806	1.44645
BokchoyProtoplast01_ID032	BokchoyProtoplast01_cmb_ID032	U				1184.5	305.16 Win009_C01	33		FALSE	0	0		16.7704	39.035	20.5509	30.8804	53.9281	42.8147	17.7405	23.5901	3.58824	3.21557	9.52081	7.2797	5.30779	4.64443	5.13641	137.704	98.0466	157.174	103.001	63.751	14.8539	35.7738	9.92513	292.06
BokchoyProtoplast01_ID033	BokchoyProtoplast01_cmb_ID033	U				1188.1	306.49 Win009_C02	34		FALSE	0	0		134.995	136.269	234.774	99.6287	231.701	94.378	33.0548	30.4494	13.6765	11.1538	23.1333	22.8504	23.8822	6.88753	29.4224	19.1722	23.4017	42.1075	12.9763	12.7418	51.8176	132.976	17.7258	45.1669
BokchoyProtoplast01_ID034	BokchoyProtoplast01_cmb_ID034	I			Cyclopropanecarboxylic acid, 1-amino- (2TMS)	1202.2	311.44 Win010_C01	35	Cyclopropanecarboxylic acid, 1-amino- (2TMS)	TRUE	22059-21-8	1-aminocyclopropane-1-carboxylic acid		0.00965741	0.0145655	0.0109696	0.0238368	0.00640208	17.0927	7.33185	9.36869	5.598	2.6632	42.9991	22.4845	15.2031	3.60561	6.68207	54.178	83.5179	170.829	33.3644	36.1655	0.00437891	34.7451	11.2879	120.456
BokchoyProtoplast01_ID035	BokchoyProtoplast01_cmb_ID035	I		C00183	Valine, DL- (2TMS)	1207.9	313.23 Win010_C02	36	Valine, DL- (2TMS)	TRUE	640-68-6|15984-93-7|7364-44-5|7480-78-6|516-06-3|72-18-4	l-valine		946.182	1267.38	1040.84	2175.51	1252.51	433.358	269.836	352.443	395.906	299.68	954.161	534.009	469.82	490.962	704.038	7780.23	11134.4	15043.7	6668.95	5821.8	557.083	2834.79	524.31	19338
BokchoyProtoplast01_ID036	BokchoyProtoplast01_cmb_ID036	U				1211	314.19 Win010_C03	37		FALSE	0	0		0.00218054	0.000304203	0.000887814	0.585994	0.00206794	0.00997076	3.7e-05	1.53e-05	1.56e-06	0.000482343	4.94854	1.91e-05	3.39976	1.6962	3.55295	2.99346	35.8305	2.60793	10.3554	15.2687	5.65e-05	8.63698	2.65936	82.4276
BokchoyProtoplast01_ID037	BokchoyProtoplast01_cmb_ID037	U				1225.9	318.87 Win011_C01	38		FALSE	0	0		132.734	55.809	223.794	201.169	101.365	23.4694	8.91964	10.2197	14.593	11.3195	12.3776	4.49499	5.53545	4.11651	16.136	162.261	119.8	279.604	177.616	111.166	158.39	161.76	6.50361	229.031
BokchoyProtoplast01_ID038	BokchoyProtoplast01_cmb_ID038	U				1228.1	319.57 Win011_C02	39		FALSE	0	0		10.2272	19.3113	8.57677	25.3835	6.93365	4.12997	2.09879	1.49402	1.30348	0.740787	2.4636	0.965772	0.741589	0.786317	1.13046	87.7817	88.3285	171.474	122.765	57.9654	5.59166	10.3722	0.966225	107.1
BokchoyProtoplast01_ID039	BokchoyProtoplast01_cmb_ID039	U				1241	323.65 Win011_C03	40		FALSE	0	0		283.357	219.095	308.155	434.184	163.342	67.0744	32.377	33.6251	35.2876	32.3136	41.0202	21.4471	15.8624	19.4549	30.4222	465.669	302.016	475.812	273.696	230.732	194.886	299.205	21.1973	1188.09
BokchoyProtoplast01_ID040	BokchoyProtoplast01_cmb_ID040	U				1250.2	326.58 Win011_C04	41		FALSE	0	0		15.1701	13.5548	10.9639	17.882	9.82324	3.06678	1.63822	0.968874	1.20921	0.731099	1.69681	1.03265	0.575299	0.590413	0.848286	6.98449	11.0396	9.67314	4.44179	4.44306	5.30621	4.26429	0.659423	28.8972
BokchoyProtoplast01_ID041	BokchoyProtoplast01_cmb_ID041	U				1256.5	328.6 Win012_C01	42		FALSE	0	0		488.287	188.914	700.944	62.6581	250.524	43.5051	14.7654	30.6287	1.9068	14.8904	36.205	8.40067	22.3839	1.5414	30.2633	70.8237	42.4256	239.831	22.9695	45.4341	209.579	248.51	11.5838	150.733
BokchoyProtoplast01_ID042	BokchoyProtoplast01_cmb_ID042	I		C00116	Glycerol (3TMS)	1260.3	329.83 Win012_C02	43	Glycerol (3TMS)	TRUE	6787-10-6|56-81-5	glycerol		5513.83	3556.81	10990.4	15570.5	7577.05	2258.89	1191.4	909.256	1428.44	870.817	1604.58	769.697	486.149	556.315	979.236	5498.35	2767.47	4942.32	3494.97	2435.83	7378.68	8221.48	699.495	11797.6
BokchoyProtoplast01_ID043	BokchoyProtoplast01_cmb_ID043	A2			Phosphoric acid (3TMS)	1261.2	330.06 Win012_C03	44	Phosphoric acid (3TMS)	TRUE	14265-44-2|10497-05-9|7664-38-2	1096:phosphoric acid		32509.7	24566.3	44578.5	54359.9	30810.4	11707.4	6977.3	6638.89	7002.53	5297.45	9050.89	5332.32	3962.7	3745.05	6995.13	2014.52	2085.44	2901.09	1740.9	1310.24	30741.9	59586.8	5431.44	4652.28
BokchoyProtoplast01_ID044	BokchoyProtoplast01_cmb_ID044	I		C00123	Leucine, DL- (2TMS)	1263.1	330.69 Win012_C04	45	Leucine, DL- (2TMS)	TRUE	15984-97-1|61-90-5|7364-46-7|7005-03-0|328-38-1|328-39-2	l-leucine		257.998	525.08	297.864	452.577	403.645	174.433	194.933	101.455	200.683	164.722	588.928	354.621	224.751	295.681	438.074	5989.64	7938.64	10010.7	5090.64	4191.31	90.2882	902.081	339.92	15615.4
BokchoyProtoplast01_ID045	BokchoyProtoplast01_cmb_ID045	U				1282.1	336.7 Win013_C01	46		FALSE	0	0		0.64337	0.291749	0.478209	0.916529	0.0289977	0.0730059	0.0398282	0.0261513	0.0487209	0.0225625	0.115859	0.0181067	0.0249798	0.0111982	0.0617814	0.120927	0.00833216	0.0492998	0.180541	0.0313266	0.135985	0.529376	0.027385	0.055695
BokchoyProtoplast01_ID046	BokchoyProtoplast01_cmb_ID046	I		C00407	Isoleucine (2TMS)	1285.2	337.73 Win013_C02	47	Isoleucine (2TMS)	TRUE	206184-16-9|7483-92-3|7004-09-3|73-32-5|15985-01-0|319-78-8|443-79-8|1509-35-9|1509-34-8	d-isoleucine		1531.38	926.938	1503.87	1422.75	1208.77	189.335	111.309	131.918	165.814	172.309	413.813	219.235	172.026	208.03	375.417	4578.08	6279.49	9118.54	3738.81	3467.34	430.928	587.852	148.81	11385.1
BokchoyProtoplast01_ID049	BokchoyProtoplast01_cmb_ID049	A2		C00258	Glyceric acid, DL- (3TMS)	1315.7	346.86 Win015_C01	50	Glyceric acid, DL- (3TMS)	TRUE	473-81-4|67525-74-0|118916-26-0|38191-87-6|14028-62-7|7525-74-0|600-19-1|6000-40-4	glyceric acid		1024.97	684.347	714.431	1971.9	419.533	64.3103	47.8305	31.4012	71.1556	22.3914	131.695	19.2858	47.5997	33.3601	33.577	117.435	322.631	169.944	80.3379	103.837	690.697	274.537	84.916	922.111
BokchoyProtoplast01_ID050	BokchoyProtoplast01_cmb_ID050	U				1320.3	348.19 Win015_C02	51		FALSE	0	0		0.0497964	0.0307775	0.0325624	0.0967965	0.0273164	0.00667439	0.00278355	0.00524382	0.00291352	0.00197351	0.00864755	0.00294251	0.00264656	0.00225405	0.00792854	0.127268	0.0600781	0.110396	0.0944036	0.0602363	0.0252794	0.0623938	0.00123428	0.272985
BokchoyProtoplast01_ID051	BokchoyProtoplast01_cmb_ID051	U				1324.1	349.25 Win015_C03	52		FALSE	0	0		0.47134	0.562176	0.282576	0.658366	0.18073	0.125617	0.0713861	0.0768853	0.077518	0.0313255	0.0933988	0.0533994	0.0226634	0.0214342	0.0720957	1.0985	0.489542	0.710141	0.69487	0.433326	0.436444	0.429862	0.0412913	3.26733
BokchoyProtoplast01_ID052	BokchoyProtoplast01_cmb_ID052	A2			Lumichrome (2MEOX)	1330.4	351.11 Win015_C04	53	Lumichrome (2MEOX)	TRUE	0	0		67.3655	51.5102	121.146	81.8463	41.6158	50.843	18.1017	26.0976	7.19118	6.12688	14.775	15.0878	6.04052	3.01592	15.0303	70.2431	46.2088	65.8029	45.3956	32.3838	32.0347	46.8846	5.12368	194.811
BokchoyProtoplast01_ID053	BokchoyProtoplast01_cmb_ID053	A2		C00490	Itaconic acid (2TMS)	1331.8	351.47 Win015_C05	54	Itaconic acid (2TMS)	TRUE	55494-04-7|97-65-4|144368-21-8	itaconic acid		0.614506	0.774691	0.853663	0.853	0.723833	0.0521767	0.051688	0.065855	0.109039	0.0703651	0.0953152	0.0565256	0.0490863	0.116269	0.0488991	0.178497	0.636409	0.349366	0.11236	0.179141	0.446292	0.398412	0.0822621	1.18933
BokchoyProtoplast01_ID054	BokchoyProtoplast01_cmb_ID054	I		C00122	Fumaric acid (2TMS)	1339.5	353.67 Win016_C01	55	Fumaric acid (2TMS)	TRUE	7704-73-6|17962-03-7|110-17-8	fumaric acid		428.199	263.809	571.688	477.766	424.425	61.7827	20.0301	42.3545	65.7426	59.6762	70.7975	21.8134	39.7194	36.8523	82.9325	12.3514	4.66058	0	4.61022	5.68294	649.742	866.067	66.2874	0
BokchoyProtoplast01_ID055	BokchoyProtoplast01_cmb_ID055	I		C00065	Serine, DL- (3TMS)	1347.5	355.96 Win016_C02	56	Serine, DL- (3TMS)	TRUE	64625-17-8|7364-48-9|312-84-5|70125-39-2|56-45-1|302-84-1	l-serine		85639.9	66266.1	80248.1	155680	67814.2	17707.4	12597.7	10101.9	9537.51	8219.84	14759.8	8390.49	5920.1	4047.08	9271.58	15459.6	48601.3	37049.8	8125.6	13231.8	43433.7	31448.9	5369.47	91094.3
BokchoyProtoplast01_ID056	BokchoyProtoplast01_cmb_ID056	I		C00408	Pipecolic acid (2TMS)	1360.4	359.68 Win016_C03	57	Pipecolic acid (2TMS)	TRUE	535-75-1|1723-00-8|69470-51-5|55255-44-2|4043-87-2|3105-95-1	pipecolic acid		27.5168	64.1324	28.6121	1367.83	14.2134	33.1033	22.444	30.1552	171.042	28.3649	73.6181	45.9054	48.9393	157.134	75.2886	130.805	201.895	157.549	297.666	95.2541	94.283	268.142	56.1445	190.478
BokchoyProtoplast01_ID057	BokchoyProtoplast01_cmb_ID057	A2			Threonic acid-1,4-lactone (2TMS)	1369.4	362.3 Win017_C01	58	Threonic acid-1,4-lactone (2TMS)	TRUE	55220-79-6	1104:threonic acid-1,4-lactone		748.642	610.926	1356.66	1978.99	981.033	46.9919	10.6044	35.2381	81.4021	45.0013	16.9342	10.7584	23.3705	31.1396	60.2473	13.4442	16.2239	29.4366	12.9018	11.259	1098.28	552.936	21.6878	24.946
BokchoyProtoplast01_ID058	BokchoyProtoplast01_cmb_ID058	I		C00188	Threonine, DL- (3TMS)	1372.9	363.29 Win017_C02	59	Threonine, DL- (3TMS)	TRUE	64569-35-3|7536-82-5|80-68-2|72-19-5|24830-94-2|632-20-2|144-98-9|28954-12-3|7537-02-2	l-threonine		11824.5	15079.5	14269.3	36077.4	18815.9	1976.14	1657.23	2021.05	3295.02	2131.44	3507.08	2357.35	2034.32	2389.53	3725.42	9912.36	16658.4	20945.7	10037	8142.55	11890.3	16224.7	2185.77	23085.8
BokchoyProtoplast01_ID059	BokchoyProtoplast01_cmb_ID059	I		C00026	Glutaric acid (2TMS)	1393.1	369.14 Win018_C01	60	Glutaric acid (2TMS)	TRUE	55494-07-0|3343-88-2|7364-81-0|111-16-0|110-94-1	glutaric acid		0.220687	0.0238669	0.168999	0.0427091	0.260569	0.0243132	0.00334434	0.00672503	0.00737348	0.0245232	0.0478353	0.0132914	0.0147781	0.00330423	0.0126824	0.00834532	0.0247148	0.0346	0.00481175	0.0106497	0.12445	0.290341	0.0462856	0.0393208
BokchoyProtoplast01_ID060	BokchoyProtoplast01_cmb_ID060	U				1409.2	373.52 Win018_C02	61		FALSE	0	0		130.991	127.904	240.719	509.009	77.144	16.4894	4.18829	6.7395	32.3976	4.95813	3.03631	2.61491	3.38387	13.4846	2.64815	33.3633	14.6612	22.0688	22.6087	13.5651	212.346	146.294	4.5348	57.5311
BokchoyProtoplast01_ID061	BokchoyProtoplast01_cmb_ID061	I		C00041	Alanine, beta- (3TMS)	0	376.51 Win019_C01	62 X_8	Alanine, beta- (3TMS)	TRUE	5269-40-9|17891-86-0|16690-93-0|107-95-9|55255-77-1	beta-alanine	TMS:HI	37.3388	27.9942	45.8107	89.0909	30.8453	19.5797	14.9641	16.836	20.2773	10.9347	46.7873	31.2029	25.3028	21.1546	31.1839	91.9345	84.9319	192.511	82.373	58.0147	39.1274	130.178	25.0454	126.002
BokchoyProtoplast01_ID063	BokchoyProtoplast01_cmb_ID062	U				1427.7	378.37 Win019_C03	63		FALSE	0	0		325.56	252.281	343.974	505.102	205.037	81.0309	39.2046	37.9062	41.9846	35.3868	49.6771	25.3565	20.0162	22.2763	36.2694	558.841	355.341	567.019	324.599	272.149	227.196	337.042	25.8766	1430.82
BokchoyProtoplast01_ID064	BokchoyProtoplast01_cmb_ID063	A2		C00263	Homoserine, DL- (3TMS)	1439	380.66 Win020_C01	64	Homoserine, DL- (3TMS)	TRUE	1927-25-9|498-19-1|56273-04-2|672-15-1	l-homoserine		29.6376	11.8914	39.3919	1.96176	25.4581	1.36192	0.138264	1.30107	0.016181	1.59153	0.751327	0.196383	0.571007	0.0135781	1.58275	0.38503	1.12739	5.04992	0.164124	0.622445	9.82429	6.9516	0.301741	1.26312
BokchoyProtoplast01_ID066	BokchoyProtoplast01_cmb_ID064	A2			Piperidin-2-one, 3-amino- (2TMS)	1451.1	384.61 Win021_C01	65	Piperidin-2-one, 3-amino- (2TMS)	TRUE	34294-79-6|32565-12-1	1109:34294-79-6		547.213	468.573	565.124	133.628	575.186	69.0021	21.9058	62.0344	5.77657	44.8507	50.1534	19.2262	30.1313	3.42327	75.3888	71.3933	87.029	257.715	50.5374	63.8233	205.51	243.072	14.4298	164.257
BokchoyProtoplast01_ID067	BokchoyProtoplast01_cmb_ID065	M1			M000000_A143003-101_CONT-MST_1434.8_EITTMS_	1454.9	385.57 Win021_C02	66	M000000_A143003-101_CONT-MST_1434.8_EITTMS_	TRUE	0	0		2146.98	1638.12	2288.2	3257.01	1370.59	526.976	251.798	239.672	254.74	227.94	312.357	151.001	128.152	135.583	230.293	3584.13	2246.32	3536.04	2056.66	1740.55	1460.1	2214.23	163.734	9454.69
BokchoyProtoplast01_ID068	BokchoyProtoplast01_cmb_ID066	M1			M000000_A148006-101_MST_1480.5_EITTMS_	1457.9	386.43 Win021_C03	67		TRUE	0	0		335.225	151.378	139.293	336.907	231.62	18.5104	4.32879	4.18957	15.8358	8.4458	8.1214	2.00923	3.60829	2.26938	13.0477	2.95217	1.09979	3.69763	6.73119	1.7537	306.5	110.655	6.35299	2.07486
BokchoyProtoplast01_ID069	BokchoyProtoplast01_cmb_ID067	M1			M000000_A148002-101_MST_1478.4_EIQTMS_	1465.1	388.29 Win021_C04	68		TRUE	0	0		229.223	275.059	134.378	249.731	324.056	24.3693	3.95875	102.866	24.0728	62.5351	50.1894	29.2426	8.97408	3.88788	154.461	2063.76	2845.14	7955.6	1318.68	1860.73	352.923	102.4	6.21538	6758.08
BokchoyProtoplast01_ID070	BokchoyProtoplast01_cmb_ID068	I		C00149	Malic acid, DL- (3TMS)	1471.5	390.02 Win022_C01	69	Malic acid, DL- (3TMS)	TRUE	636-61-3|617-48-1|38166-11-9|97-67-6|6915-15-7	l-malic acid		7764.4	3398.93	14797.7	17870.3	7438.54	720.958	220.059	744.316	2000.26	491.646	833.358	614.686	666.797	1612.49	1087	4.88079	66.5923	1.24162	54.8908	12.4353	14117	28164.1	1491.42	104.443
BokchoyProtoplast01_ID071	BokchoyProtoplast01_cmb_ID069	U				1480.2	392.31 Win022_C02	70		FALSE	0	0		233.056	248.23	268.616	397.172	159.041	31.0187	15.726	22.6798	27.6685	17.0226	30.4116	16.7555	19.1021	18.4561	21.8401	36.5528	45.0333	54.8663	33.663	26.7564	239.242	360.693	24.9861	92.1623
BokchoyProtoplast01_ID072	BokchoyProtoplast01_cmb_ID070	U				1490.4	394.97 Win022_C03	71		FALSE	0	0		252.918	237.399	218.487	475.966	135.649	44.7696	27.0094	30.6356	47.321	29.3338	40.7556	20.6224	16.4642	24.4505	31.7559	156.495	109.004	174.525	109.19	83.9865	247.365	425.035	25.024	354.92
BokchoyProtoplast01_ID073	BokchoyProtoplast01_cmb_ID071	M1			M000000_A151002-101_MST_1509.5_EITTMS_	1498	396.99 Win023_C01	72		TRUE	0	0		843.961	875.987	1469.92	543.914	1146.78	152.367	43.2041	164.968	56.8899	132.032	98.6613	56.5197	77.0148	28.3371	175.667	39.4308	105.19	146.241	39.2225	49.4746	771.405	1389.96	71.9047	123.526
BokchoyProtoplast01_ID075	BokchoyProtoplast01_cmb_ID073	I		C00073	Methionine, DL- (2TMS)	1513.7	400.88 Win024_C01	74	Methionine, DL- (2TMS)	TRUE	348-67-4|7005-18-7|27844-10-6|59-51-8|63-68-3	1311:methionine2_2tms		1156.68	516.076	1370.85	210.347	507.747	99.0228	52.1732	102.954	8.80175	51.3596	118.118	35.61	59.5392	8.31943	61.5056	340.956	319.293	1220.07	170.813	257.115	412.934	520.7	30.6497	662.878
BokchoyProtoplast01_ID078	BokchoyProtoplast01_cmb_ID075	I		C00334	Butyric acid, 4-amino- (3TMS)	1523.9	403.2 Win024_C04	76	Butyric acid, 4-amino- (3TMS)	TRUE	56-12-2|39538-11-9|39508-23-1	4-aminobutyric acid		26518.9	32941.2	31457	85260.3	42269.9	7509.96	5471.84	3710.96	6898.73	4874.7	7715.67	2844.53	3225.6	3318.1	5622.83	30076	22397.5	67359.6	40359.4	19526.3	26840.9	42372.7	4244.81	26326.9
BokchoyProtoplast01_ID080	BokchoyProtoplast01_cmb_ID076	A2		C01620	Threonic acid (4TMS)	1538.1	406.85 Win025_C01	77	Threonic acid (4TMS)	TRUE	3909-12-4|7306-96-9|38191-88-7|70753-61-6	l-threonic acid		6047.74	2783.46	5311.79	9826.09	8546.11	336.143	80.6181	232.591	814.587	361.889	102.753	103.155	154.105	262.605	647.629	290.37	259.648	340.537	311.449	204.404	10393.3	3725.97	233.667	645.625
BokchoyProtoplast01_ID081	BokchoyProtoplast01_cmb_ID077	I		C00026	Glutaric acid, 2-oxo- (1MEOX) (2TMS)	1558.8	411.97 Win026_C01	78	Glutaric acid, 2-oxo- (1MEOX) (2TMS)	TRUE	60022-87-9|328-50-7|305-72-6	2-oxoglutaric acid		10.9786	13.1197	20.6773	26.1661	7.38031	1.02107	0.993786	1.29802	0.802677	0.37372	1.25748	0.471904	2.44171	1.29498	0.104939	0.0065895	0.00759868	0.0075766	0.00909817	0.00472302	7.09156	31.1997	2.00247	0.0111056
BokchoyProtoplast01_ID082	BokchoyProtoplast01_cmb_ID078	U				1571.8	415.22 Win026_C02	79		FALSE	0	0		288.386	269.54	475.097	192.418	397.303	40.7327	11.7866	45.3028	15.682	55.8209	43.9296	20.0094	23.6057	11.1989	64.2387	15.0684	38.9808	71.3171	15.067	19.4464	249.076	333.766	23.1184	37.1815
BokchoyProtoplast01_ID083	BokchoyProtoplast01_cmb_ID079	A2		C00064	Glutamine [-H2O] (3TMS)	1585.2	418.51 Win026_C03	80	Glutamine [-H2O] (3TMS)	TRUE	0	0		524.523	386.207	581.805	233.325	852.111	45.2557	13.7047	150.986	25.2767	178.57	121.885	59.1621	34.3194	13.4151	279.396	21.0815	111.726	209.192	41.9456	46.7524	483.615	466.462	40.1719	44.4782
BokchoyProtoplast01_ID084	BokchoyProtoplast01_cmb_ID080	U				1592.6	420.33 Win027_C01	81		FALSE	0	0		25.8669	20.6535	23.0422	23.1197	8.78636	2.11963	1.07449	1.96517	0.555462	2.13253	2.52909	1.58613	1.24743	0.316917	1.70954	0.151084	0.478124	0.505396	0.679627	0.230583	15.861	15.1528	0.867241	0.175609
BokchoyProtoplast01_ID085	BokchoyProtoplast01_cmb_ID081	U				1600.7	422.29 Win027_C02	82		FALSE	0	0		0.0211347	1.12191	0.899546	3.65437	6.46325	22.5172	10.5992	9.26913	9.50409	9.57239	13.1921	5.63262	4.08699	4.24233	8.60151	3.66987	2.21226	4.0762	2.60329	1.71784	0.00159865	67.3961	5.0586	8.11367
BokchoyProtoplast01_ID090	BokchoyProtoplast01_cmb_ID084	U				1605.5	423.42 Win027_C07	85		FALSE	0	0		208.199	217.919	225.097	500.156	172.799	10.7894	4.73607	4.04138	5.16187	2.68863	1.92168	1.87858	6.26133	2.65165	2.49175	9.84242	11.4853	15.7794	5.40923	5.89919	152.627	91.4841	4.40626	24.6386
BokchoyProtoplast01_ID092	BokchoyProtoplast01_cmb_ID086	U				1611.9	424.85 Win027_C09	87		FALSE	0	0		67.9512	53.4701	163.334	35.5965	118.189	42.5731	17.6561	39.1755	4.83043	8.9326	25.8115	16.2507	9.62686	1.7005	43.8957	0.387454	0.408933	0.644979	0.513817	0.301608	25.4147	46.1318	7.33117	0.962445
BokchoyProtoplast01_ID093	BokchoyProtoplast01_cmb_ID087	I		C00079	Phenylalanine, DL- (2TMS)	1625.3	428 Win028_C01	88	Phenylalanine, DL- (2TMS)	TRUE	673-06-3|150-30-1|7364-51-4|3617-44-5|2899-42-5|63-91-2|2899-52-7	l-phenylalanine		373.202	219.331	444.268	559.617	250.845	187.153	91.4358	123.262	121.264	77.9837	288.417	80.6819	153.393	89.3541	203.735	332.743	548.218	707.912	240.849	279.238	314.95	1357.13	134.233	1112.1
BokchoyProtoplast01_ID094	BokchoyProtoplast01_cmb_ID088	U				1633.5	429.86 Win028_C02	89		FALSE	0	0		77.8486	141.816	96.7621	257.927	163.063	25.7306	17.1858	20.3637	40.711	20.2281	56.6517	22.2896	31.6947	42.3458	46.314	201.515	248.664	267.776	242.531	149.251	91.7626	193.826	39.4536	508.564
BokchoyProtoplast01_ID095	BokchoyProtoplast01_cmb_ID089	I		C00986	Propane, 1,3-diamino- (4TMS)	1646.8	433.01 Win029_C01	90	Propane, 1,3-diamino- (4TMS)	TRUE	10517-44-9|109-76-2	1,3-diaminopropane		14.2273	16.181	27.5562	12.9212	24.2099	3.0413	0.897117	2.69237	1.10913	2.72225	2.47721	1.13642	1.69266	0.877321	3.62248	0.391114	1.14362	1.98456	0.419008	0.518035	13.8592	22.1446	1.11178	0.892004
BokchoyProtoplast01_ID096	BokchoyProtoplast01_cmb_ID090	I		C00121	Ribose, D- (1MEOX) (4TMS)	1655	434.91 Win029_C02	91	Ribose, D- (1MEOX) (4TMS)	TRUE	56196-08-8|50-69-1|6915-40-8	d-ribose		126.411	136.984	190.141	139.668	110.108	67.0243	35.3276	25.9819	23.1751	16.8513	132.244	19.9567	27.6078	11.7786	27.6366	79.559	58.9946	103.591	35.0245	42.2261	107.236	187.855	32.4734	313.41
BokchoyProtoplast01_ID097	BokchoyProtoplast01_cmb_ID091	I		C00152	Asparagine, DL- (3TMS)	0	435.34 Win029_C03	92 X_86	Asparagine, DL- (3TMS)	TRUE	7006-34-0|55649-62-2|3130-87-8|70-47-3|2058-58-4	l-asparagine	TMS:HI	3624.7	3768.87	8389.33	1506.72	6673.2	745.695	251.172	572.183	187.976	588.165	448.986	206.019	483.433	139.235	698.951	36.7419	69.6197	94.8259	25.4885	38.1447	2947.47	6942.82	418.167	146.104
BokchoyProtoplast01_ID099	BokchoyProtoplast01_cmb_ID093	M1			M000000_A168011-101_MST_1688.6_EIQTMS_	1680	440.65 Win030_C01	94		TRUE	0	0		2758.65	2861.11	7107.45	1275.79	7087.08	551.213	117.966	530.775	117.878	635.289	483.878	163.981	372.078	106.483	932.193	221.897	263.96	491.886	177.966	209.555	3046.23	4347.05	205.422	685.556
BokchoyProtoplast01_ID100	BokchoyProtoplast01_cmb_ID094	A2		C08278	Suberic acid (2TMS)	1686.1	442.08 Win030_C02	95	Suberic acid (2TMS)	TRUE	505-48-6|43199-48-0	suberic acid		2.9985	9.51676	6.34194	17.463	3.96989	2.47243	0.601196	1.66344	2.93791	0.935637	6.78907	5.52095	1.10654	2.39526	0.750601	7.41433	4.7972	7.96445	6.44934	3.55133	14.4541	20.0275	0.945586	12.0944
BokchoyProtoplast01_ID101	BokchoyProtoplast01_cmb_ID095	I		C00474	Ribitol, D- (5TMS)	1698.6	445 Win031_C01	96	Ribitol, D- (5TMS)	TRUE	488-82-4|14199-73-6|14199-72-5|84709-42-2|7313-55-5|12426-00-5|32381-53-6|488-81-3|87-99-0|37191-59-6|75398-81-1|2152-56-9	d-arabitol		270.27	252.525	205.339	176.367	199.601	268.415	311.482	241.25	269.389	268.154	436.681	287.669	187.942	199.411	410.353	185.375	180.836	278.746	147.525	120.12	295.858	1976.81	218.436	438.79
BokchoyProtoplast01_ID103	BokchoyProtoplast01_cmb_ID097	I		C00417	Aconitic acid, cis- (3TMS)	1727.6	451.44 Win032_C01	98	Aconitic acid, cis- (3TMS)	TRUE	585-84-2|4023-65-8|55530-71-7	trans-aconitic acid		0.00772791	0.015317	0.00302959	5.17e-05	0.0166024	4.13863	6.02189	2.29164	10.5355	0.0030504	2.93419	3.99009	1.51674	4.84876	4.32512	3.68943	3.25511	3.8083	3.68841	2.22017	0.00833337	27.9762	1.98703	14.7787
BokchoyProtoplast01_ID106	BokchoyProtoplast01_cmb_ID099	U				1743.1	454.83 Win032_C04	100		FALSE	0	0		2993.64	2922.7	3261.29	3825.52	1958.1	318.245	156.753	238.155	247.756	180.448	320.881	166.981	229.042	182.146	199.344	195.506	278.613	378.175	177.459	156.7	2574.16	3697.72	268.377	462.401
BokchoyProtoplast01_ID107	BokchoyProtoplast01_cmb_ID100	M1			M000000_A177004-101_MST_1770.9_EITTMS_	1748.5	455.99 Win032_C05	101		TRUE	0	0		636.396	529.716	355.851	1626.69	373.666	61.1491	37.7096	88.966	107.127	76.462	125.623	95.6736	27.6884	63.2961	110.537	996.351	772.814	1368.6	916.292	569.921	523.306	435.718	55.5229	1777.61
BokchoyProtoplast01_ID108	BokchoyProtoplast01_cmb_ID101	I		C00064	Glutamine, L- (3TMS)	0	458.74 Win033_C01	102 X_97	Glutamine, L- (3TMS)	TRUE	5959-95-5|56-85-9|56145-13-2|6899-04-3|585-21-7	l-glutamine	TMS:HI	110830	96087.2	182653	73359.8	165960	23411.3	7534.42	14261.6	6388.29	16568.1	15768.8	6803.95	11438	5009.94	19650.1	3646.99	6600.41	14231.8	2419.48	3580.39	86317.5	139647	10911.5	9004.51
BokchoyProtoplast01_ID111	BokchoyProtoplast01_cmb_ID102	I		C00493	Shikimic acid (4TMS)	1783.6	463.72 Win034_C01	103	Shikimic acid (4TMS)	TRUE	138-59-0|55520-78-0	shikimic acid		254.286	49.7087	45.565	32.1349	13.3251	2.15999	0.995545	2.17068	1.07303	0.99249	2.57627	0.807838	0.741909	0.512271	0.83896	8.11666	10.9096	14.7343	16.6057	7.55579	39.2294	9.82155	0.933693	13.2934
BokchoyProtoplast01_ID112	BokchoyProtoplast01_cmb_ID103	I		C00311	Isocitric acid, DL- (4TMS)	1796.7	466.61 Win034_C02	104	Isocitric acid, DL- (4TMS)	TRUE	30810-51-6|320-77-4|6061-97-8|1637-73-6|55517-57-2	isocitric acid		5.70019	21.6122	0.0010742	377.406	32.3878	3.53988	4.11218	4.2895	5.70697	0.226466	6.9659	4.46727	3.71672	21.7492	6.89456	6.54827	8.24677	9.7748	12.3496	2.89494	76.7922	354.701	21.3264	6.75396
BokchoyProtoplast01_ID113	BokchoyProtoplast01_cmb_ID104	I		C00158	Citric acid (4TMS)	1799	467.11 Win034_C03	105	Citric acid (4TMS)	TRUE	5949-29-1|14330-97-3|77-92-9	citric acid		589.001	392.141	606.851	2256.67	274.42	45.0878	5.37987	49.4816	68.4941	35.7525	44.9901	18.4333	36.9644	141.476	44.3353	5.35043	6.40882	7.18424	5.92012	4.56175	497.471	2562.2	146.514	12.0619
BokchoyProtoplast01_ID114	BokchoyProtoplast01_cmb_ID105	I		C00077	Ornithine, DL- (4TMS)	0	468.7 Win035_C01	106 X_83	Ornithine, DL- (4TMS)	TRUE	7006-33-9|24595-70-8|3184-13-2|55556-70-2|70-26-8|348-66-3|616-07-9	l-ornithine	TMS:HI	932.897	132.769	250.974	41.5438	184.028	17.3109	5.0825	12.9266	0.868437	9.40203	15.86	3.28602	9.00603	0.63255	17.2615	24.846	19.0185	72.3141	12.5035	18.6054	81.5668	65.7265	3.25251	59.965
BokchoyProtoplast01_ID115	BokchoyProtoplast01_cmb_ID106	I		C00062	Arginine, DL-, -NH3 (3TMS)	1810	469.37 Win035_C02	107	Arginine, DL-, -NH3 (3TMS)	TRUE	0	1154:arginine, dl-, -nh3 (3tms)		163.895	136.209	161.331	25.5489	128.431	1.90609	0.406504	3.87312	0.213167	1.08484	1.09756	0.542148	0.540401	0.0999804	1.52602	42.4252	48.8708	100.915	44.5712	38.5329	89.287	4.46958	0.28909	111.482
BokchoyProtoplast01_ID116	BokchoyProtoplast01_cmb_ID107	I		C00296	Quinic acid, D(-)- (5TMS)	1839.7	475.64 Win036_C01	108	Quinic acid, D(-)- (5TMS)	TRUE	77-95-2|36413-60-2	d-quinic acid		240.002	288.527	891.239	1693.03	301.324	80.1704	22.5745	90.6839	76.2684	58.1702	105.701	45.3202	104.696	101.724	62.4964	383.002	466.926	778.674	383.146	307.796	383.018	1507.03	93.2631	646.347
BokchoyProtoplast01_ID119	BokchoyProtoplast01_cmb_ID110	U				1858.4	479.53 Win037_C02	111		FALSE	0	0		3599.08	2573.52	3433.02	4740.18	1262.22	748.778	409.728	343.816	445.361	318.763	371.478	277.842	169.775	245.683	290.207	14952.2	3640.17	7913	4828.9	4182.33	2220.32	3199.59	222.512	36029
BokchoyProtoplast01_ID120	BokchoyProtoplast01_cmb_ID111	I		C00095	Fructose, D- (1MEOX) (5TMS)	0	479.83 Win037_C03	112 X_245 X_110	Fructose, D- (1MEOX) (5TMS)	TRUE	57-48-7|53188-23-1|56196-14-6|19126-98-8|7776-48-9|30237-26-4	d-fructose	COR_OK:HDA COR_OK:PC1	119816	106088	122043	220028	98808.8	37400	20314.8	18641.1	19687.7	12897.9	17613	9637.99	9125.88	8075.15	15276.3	180554	139890	201401	91356.9	90293.8	80911.4	128271	11932.6	572220
BokchoyProtoplast01_ID121	BokchoyProtoplast01_cmb_ID112	I		C00159	Mannose, D- (1MEOX) (5TMS)	0	481.29 Win037_C04	113 X_117	Mannose, D- (1MEOX) (5TMS)	TRUE	10030-80-5|3458-28-4|7296-15-3|530-26-7|31103-86-3	d-mannose	COR_NG:HI	395.088	457.277	245.805	1106.23	313.704	0.00214362	0.678804	0.491882	11.4952	10.4488	0.831365	1.23604	4.01696	15.3597	6.57032	19.7336	49.0145	35.2247	81.7925	33.6167	166.11	54.1294	5.5046	25.8109
BokchoyProtoplast01_ID125	BokchoyProtoplast01_cmb_ID114	U				1897.3	487.63 Win039_C01	115		FALSE	0	0		34.6762	37.9772	54.025	127.799	35.3436	0.771231	0.00580437	1.16404	1.38756	0.543749	0.165216	0.00861374	0.583535	1.69356	0.00817743	19.1617	16.1322	22.6353	20.2556	16.0323	25.2119	17.7531	0.175656	40.5825
BokchoyProtoplast01_ID130	BokchoyProtoplast01_cmb_ID117	I		C00047	Lysine (4TMS)	1910.8	490.32 Win039_C06	118	Lysine (4TMS)	TRUE	55429-07-7|56-87-1|24595-69-5|70-54-2|923-27-3|657-27-2	l-lysine		669.852	589.217	811.6	348.62	879.584	65.1063	45.1104	59.4489	29.4164	63.1918	87.0577	34.2743	43.0814	34.7802	87.9239	939.242	1353.98	1439.95	1157.35	871.285	317.973	707.395	70.3402	2765.53
BokchoyProtoplast01_ID131	BokchoyProtoplast01_cmb_ID118	I		C00135	Histidine, L- (3TMS)	1911.8	490.52 Win039_C07	119	Histidine, L- (3TMS)	TRUE	351-50-8|71-00-1|4998-57-6|17908-25-7|5934-29-2|7006-35-1	l-histidine		190.032	170.064	261.852	102.523	283.868	26.7717	18.0009	21.0881	7.1969	38.1931	29.0425	14.7558	21.4354	7.90006	26.1056	23.2571	37.9893	38.1499	27.5544	21.9411	71.3044	207.451	14.6441	69.2956
BokchoyProtoplast01_ID132	BokchoyProtoplast01_cmb_ID119	A2		C00794	Sorbitol, D- (6TMS)	1928	492.14 Win040_C01	120	Sorbitol, D- (6TMS)	TRUE	8042-39-5|8046-05-7|50-70-4|63800-20-4|8036-93-9|14199-80-5|8013-15-8|8045-74-7|15060-73-8|75398-79-7|6706-59-8|36134-87-9|8014-89-9|3959-53-3	d-sorbitol		173.78	213.207	878.912	1877.57	224.039	56017.9	49620	30443.2	40984.5	34059.5	53836.7	37989.2	22871.5	26204.7	51898.5	236337	169025	232258	133508	111705	252.88	243419	26120.2	595072
BokchoyProtoplast01_ID134	BokchoyProtoplast01_cmb_ID120	I		C00082	Tyrosine, L- (3TMS)	1932	494.53 Win040_C03	121	Tyrosine, L- (3TMS)	TRUE	556-03-6|556-02-5|55520-40-6|51220-73-6|7536-83-6|60-18-4|7415-19-2	l-tyrosine		81.2645	44.3284	176.033	112.637	86.9108	7.47228	4.53871	122.71	147.767	102.261	181.931	5.50238	81.2	96.5012	2.02301	815.429	1251.53	1530.68	1106.78	1017.62	50.7409	1237.9	118.558	2427.74
BokchoyProtoplast01_ID135	BokchoyProtoplast01_cmb_ID121	U				1959.3	499.88 Win041_C01	122		FALSE	0	0		0.000225313	1.21e-06	2.82e-06	0.000103531	7.46e-05	9.87e-08	3.94e-07	7.87e-07	2.4e-07	1.6e-05	1.04e-07	5.96e-07	2.06e-08	5.32e-07	2.18e-06	0.0162575	4.46e-05	0.0019288	0.000138777	0.00038433	8.15e-06	3.01e-07	7.29e-06	0.0194095
BokchoyProtoplast01_ID136	BokchoyProtoplast01_cmb_ID122	A2		C14214	Dibutyl phthalate	1968.4	501.74 Win041_C02	123	Dibutyl phthalate	TRUE	0	0		109.627	137.923	86.5054	152.559	49.8674	25.8299	10.3915	16.4511	23.5607	10.2112	20.5468	7.50226	9.17921	6.89028	9.22034	398.829	121.019	272.734	199.225	139.342	71.3974	100.544	7.91252	919.168
BokchoyProtoplast01_ID138	BokchoyProtoplast01_cmb_ID124	I		C00198	D-(+)-Gluconic acid delta-lactone (1MEOX) (4TMS)	1986.1	505.16 Win042_C01	125	D-(+)-Gluconic acid delta-lactone (1MEOX) (4TMS)	TRUE	0	0		127.522	153.691	51.7628	60.5582	26.3674	3.28763	5.99389	0.965082	1.77585	1.73837	16.7172	2.69542	2.63296	1.44098	6.04952	21.7691	25.3395	40.6017	21.2416	16.2101	15.0554	21.2488	4.2664	52.2684
BokchoyProtoplast01_ID139	BokchoyProtoplast01_cmb_ID125	U				2000.3	508.01 Win043_C01	126		FALSE	0	0		140.232	109.268	252.84	403.273	197.226	17.8869	14.1237	13.2579	17.5673	15.8942	18.8204	6.79038	10.0532	13.6289	13.6819	13.9319	21.6961	20.6359	18.0303	12.0069	125.285	180.837	15.1266	34.3108
BokchoyProtoplast01_ID140	BokchoyProtoplast01_cmb_ID126	M2			PR_MST_Acid (Fatty acid trimethylsilyl ester)_2016.2	2016.2	511 Win043_C02	127	PR_MST_Acid (Fatty acid trimethylsilyl ester)_2016.2	TRUE	0	0		65.3634	47.8653	98.0679	208.405	82.6291	57.7775	16.0185	67.0611	34.4498	20.2547	36.5543	24.3857	7.43753	8.46994	102.586	137.528	170.196	313.716	314.481	121.533	90.6677	114.978	8.93572	174.601
BokchoyProtoplast01_ID142	BokchoyProtoplast01_cmb_ID128	I		C00482	Sinapic acid, cis- (2TMS)	2049.6	517.28 Win044_C02	129	Sinapic acid, cis- (2TMS)	TRUE	0	1213:sinapic acid, cis-		30.0186	19.7654	50.4839	63.0449	24.1088	10.08	5.92857	6.42579	8.17978	5.74863	10.3653	4.83952	4.40164	4.3191	6.37487	4.96677	4.28506	6.08002	2.38238	2.74893	43.1103	72.7361	6.05719	16.6386
BokchoyProtoplast01_ID143	BokchoyProtoplast01_cmb_ID129	M1			M000000_A231002-101_MST_2301.7_EIGTMS_	2060.7	519.43 Win044_C03	130		TRUE	0	0		47.8065	71.584	25.5646	43.2007	45.8516	10.449	2.84922	11.2567	5.84233	3.08289	6.42574	4.50721	1.66397	0.874544	15.5875	293.883	173.796	404.604	240.252	151.783	67.8574	10.5948	1.53524	707.809
BokchoyProtoplast01_ID144	BokchoyProtoplast01_cmb_ID130	U				2080.9	523.22 Win045_C01	131		FALSE	0	0		2271.09	1117.36	1546.74	3812.95	655.409	848.046	283.137	394.158	293.489	173.385	282.474	129.435	117.566	110.857	104.782	1178.58	1629.24	2212.85	1792.37	901.987	1493.97	2098.68	223.22	1776.58
BokchoyProtoplast01_ID145	BokchoyProtoplast01_cmb_ID131	I		C00137	Inositol, myo- (6TMS)	2089.3	523.48 Win045_C02	132	Inositol, myo- (6TMS)	TRUE	2582-79-8|6917-35-7|87-89-8	myo-inositol		50081.1	65435.1	60486	97337	66030.3	10410.2	7764.31	5865.31	8179.38	7121.26	8414.22	5645.86	3817.29	3944.76	8241.65	4605.29	8272.64	10493.3	10342.9	4460.22	37256.6	51525.6	3500.7	6171.29
BokchoyProtoplast01_ID147	BokchoyProtoplast01_cmb_ID132	M1			M000000_A211001-101_MST_2105.7_EITTMS_	2094.6	525.78 Win045_C04	133		TRUE	0	0		595.911	814.495	610.106	2415.51	968.57	88.3221	86.2987	70.1372	184.908	114.557	101.783	65.063	43.7759	97.5248	128.466	242.983	268.715	342.035	312.303	169.133	569.531	809.594	52.8768	431.356
BokchoyProtoplast01_ID149	BokchoyProtoplast01_cmb_ID134	I		C01197	Caffeic acid, trans- (3TMS)	0	531.95 Win046_C02	135 X_124	Caffeic acid, trans- (3TMS)	TRUE	10586-03-5|501-16-6|331-39-5	trans-caffeic acid	COR_OK:PC1	73.0405	47.824	59.2728	205.68	92.7118	28.3622	18.0713	17.8413	35.6705	19.4657	43.6706	10.1152	8.72445	14.0567	29.2082	123.208	75.8702	119.568	132.638	67.2197	122.496	112.592	10.3693	249.512
BokchoyProtoplast01_ID150	BokchoyProtoplast01_cmb_ID135	U				2159	537.53 Win047_C01	136		FALSE	0	0		78.9248	81.1771	47.5709	165.77	41.8814	12.2936	8.34048	9.94308	13.7035	8.86498	24.0421	13.5096	17.087	15.3715	12.0299	1.84024	4.17403	2.75618	5.08681	1.91626	37.7058	133.055	17.4126	3.55077
BokchoyProtoplast01_ID151	BokchoyProtoplast01_cmb_ID136	I		C01389	Phytol (1TMS)	0	538.66 Win047_C02	137 X_134	Phytol (1TMS)	TRUE	150-86-7|7541-49-3|57397-39-4	phytol	COR_OK:PC1	34.8429	42.79	33.0233	57.7746	26.8822	7.14605	4.29719	3.91803	5.40293	4.12742	6.33727	2.52928	3.19948	3.74631	3.83369	358.343	147.602	316.944	162.072	143.406	29.1918	49.9867	3.82775	824.238
BokchoyProtoplast01_ID152	BokchoyProtoplast01_cmb_ID137	M1			M000000_A221004-101_MST_2214.3_EITTMS_	2194.3	543.9 Win048_C01	138		TRUE	0	0		28.8771	22.776	16.8899	90.1317	20.4056	7.28802	3.65232	13.7675	11.5204	4.34025	10.4556	5.97568	3.32039	4.99332	9.27686	10.9896	14.3149	12.5491	9.78765	7.34186	20.5755	36.5408	4.24138	42.3877
BokchoyProtoplast01_ID154	BokchoyProtoplast01_cmb_ID139	I		C01595	Octadecadienoic acid, 9,12-(Z,Z)-, n- (1TMS)	2208.5	546.36 Win048_C03	140	Octadecadienoic acid, 9,12-(Z,Z)-, n- (1TMS)	TRUE	8024-22-4|60-33-3	linoleic acid		306.731	265.836	240.042	561.72	221.166	123.805	61.6384	137.291	100.205	62.3699	118.406	77.7653	26.9357	28.0945	174.831	413.223	345.639	577.921	561.601	267.221	364.622	424.389	31.7698	726.462
BokchoyProtoplast01_ID155	BokchoyProtoplast01_cmb_ID140	I		C01595	Octadecatrienoic acid, 9,12,15-(Z,Z,Z)-, n- (1TMS)	2216	547.69 Win048_C04	141	Octadecatrienoic acid, 9,12,15-(Z,Z,Z)-, n- (1TMS)	TRUE	463-40-1|21661-08-5	alpha-linolenic acid		863.242	586.125	1116.99	2357.18	746.306	693.092	303.722	904.631	534.213	312.808	705.23	521.591	138.729	178.346	1285.82	1776.73	1698.17	3192.52	3308.77	1320.53	926.439	2184.16	182.593	2252.81
BokchoyProtoplast01_ID156	BokchoyProtoplast01_cmb_ID141	I		C00078	Tryptophan, DL- (3TMS)	2218.9	548.18 Win048_C05	142	Tryptophan, DL- (3TMS)	TRUE	153-94-6|61445-27-0|55429-28-2|6912-86-3|54-12-6|73-22-3|7537-04-4	l-tryptophane		36.4308	36.7896	49.0971	41.3077	34.4482	15.2331	15.3419	12.5227	26.4875	14.8083	29.0061	34.3052	17.1208	16.6532	41.2249	54.9632	270.949	134.985	64.8536	72.0704	24.9797	188.154	32.4431	284.245
BokchoyProtoplast01_ID157	BokchoyProtoplast01_cmb_ID142	I		C00398	Tryptamine (3TMS)	2236.8	551.27 Win049_C01	143	Tryptamine (3TMS)	TRUE	343-94-2|61-54-1|55334-17-3	tryptamine		81.5122	89.7586	102.482	174.553	89.2131	23.0045	10.0838	16.3333	20.4259	11.0469	22.8318	8.75168	8.3557	7.74151	21.1534	87.2965	70.3864	120.287	128.293	59.4251	104.199	117.941	9.68661	139.868
BokchoyProtoplast01_ID158	BokchoyProtoplast01_cmb_ID143	I		C00315	Spermidine (5TMS)	0	554.16 Win050_C01	144 X_249 X_139	Spermidine (5TMS)	TRUE	334-50-9|124-20-9	spermidine	COR_OK:HDA TMS:HI	23.2928	7.11838	29.4811	12.5686	3.9103	1.95693	0.798071	0.744742	0.266567	0.399232	2.09851	0.870782	0.398567	0.222017	0.740861	58.5606	58.8427	146.937	82.58	47.0388	17.9656	15.1101	0.346842	58.9024
BokchoyProtoplast01_ID160	BokchoyProtoplast01_cmb_ID145	A2		C00049	Aspartic acid, L- (3TMS)	0	555.22 Win050_C03	146 X_246	Aspartic acid, L- (3TMS)	TRUE	55268-53-6|1783-96-6|617-45-8|56-84-8|15985-05-4	l-aspartic acid	COR_OK:HDA	16.5749	18.0647	26.1448	29.5124	17.9902	2.57134	1.26646	3.4431	4.5277	3.53328	4.86138	0.674217	1.76144	2.07442	4.59396	0.00182926	0.0469643	0.0200953	0.000202603	0.00392455	18.0157	31.7521	1.98825	0.0873212
BokchoyProtoplast01_ID161	BokchoyProtoplast01_cmb_ID146	U				2281.9	559.14 Win051_C01	147		FALSE	0	0		2928.03	2225.96	6143.4	11120.2	4265.79	1423.17	581.29	928.112	1308.68	832.024	1272.53	485.375	465.874	393.331	732.779	297.586	191.789	264.011	520.106	183.414	4509.47	8586.3	556.563	459.273
BokchoyProtoplast01_ID162	BokchoyProtoplast01_cmb_ID147	I		C00491	Cystine, L- (4TMS)	2285.9	559.84 Win051_C02	148	Cystine, L- (4TMS)	TRUE	69688-44-4|349-46-2|56-89-3|923-32-0|24645-67-8	l-cystine		1.071	0.279998	1.43134	0.573302	0.544132	0.0636108	0.142194	0.0437798	0.0595033	0.0819564	0.258989	0.0710076	0.119562	0.163705	0.0385723	0.00995671	0.0344492	0.00640187	0.0157657	0.0112916	0.844048	1.53875	0.130939	0.0788783
BokchoyProtoplast01_ID163	BokchoyProtoplast01_cmb_ID148	I		C00092	Glucose-6-phosphate (1MEOX) (6TMS)	2318.5	565.25 Win052_C01	149	Glucose-6-phosphate (1MEOX) (6TMS)	TRUE	54010-71-8|299-31-0|56-73-5|55530-73-9|28176-73-0|3671-99-6	d-glucose-6-phosphate		56.3867	31.2878	37.0329	200.647	28.4932	11.7722	3.28501	7.08953	10.4462	7.98354	11.5774	4.61122	6.03817	9.90953	8.62739	0.352464	0.37663	0.589178	0.103468	0.196387	21.2182	108.476	6.19881	1.38289
BokchoyProtoplast01_ID164	BokchoyProtoplast01_cmb_ID149	M1			M000000_A237002-101_MST_2370.2_EITTMS_	2351	570.69 Win053_C01	150		TRUE	0	0		126.041	188.503	107.854	447.075	169.902	17.4035	15.2569	12.8799	34.6753	21.7576	20.3129	13.4316	8.02326	23.0183	23.1135	40.6341	50.1368	60.1609	61.6078	30.238	97.8896	157.8	9.9777	66.0739
BokchoyProtoplast01_ID165	BokchoyProtoplast01_cmb_ID150	U				2358.8	571.96 Win053_C02	151		FALSE	0	0		0.373069	0.0108016	0.0177144	0.0210736	0.057439	1.92076	1.6349	0.979399	1.96648	1.51089	3.54702	1.8646	1.12635	0.613511	2.71009	0.376069	0.0591301	0.532341	0.0728305	0.096143	0.395397	6.67776	1.704	0.479111
BokchoyProtoplast01_ID166	BokchoyProtoplast01_cmb_ID151	M1			M000000_A241003-101_MST_2409_EIQTMS_	2365.5	573.09 Win053_C03	152		TRUE	0	0		1.11462	1.51561	1.98608	2.54977	0.92277	1.64789	1.39239	2.60076	2.45408	2.31863	9.73292	3.50135	3.86567	4.95575	5.85971	24.13	19.5754	19.3573	19.3305	14.2829	0.834513	11.9404	6.21258	89.132
BokchoyProtoplast01_ID167	BokchoyProtoplast01_cmb_ID152	U				2375.1	574.74 Win053_C04	153		FALSE	0	0		7.40901	7.73874	3.73875	10.8729	4.52638	0.92707	0.578311	0.707132	0.63395	0.59092	0.790625	0.403362	0.335845	0.391299	0.81705	1.51716	1.87728	1.71541	2.01127	1.1121	2.35125	6.32431	0.289674	3.98828
BokchoyProtoplast01_ID168	BokchoyProtoplast01_cmb_ID153	U				2390.8	577.27 Win054_C01	154		FALSE	0	0		3.39824	2.93254	5.11224	2.77071	5.86436	2.30613	1.00192	0.577442	0.932453	0.641277	1.12361	0.554766	0.869978	0.764182	1.46298	22.6814	12.7216	20.8196	15.1641	11.4534	1.54746	9.66053	1.09518	55.2872
BokchoyProtoplast01_ID169	BokchoyProtoplast01_cmb_ID154	I		C01177	Inositol-1-phosphate, myo- (7TMS)	2402.9	579.26 Win054_C02	155	Inositol-1-phosphate, myo- (7TMS)	TRUE	15421-51-9|55568-91-7	1248:inositol-1-phosphate, myo-		71.7531	40.0435	57.842	114.343	15.9841	7.85716	5.24797	6.47378	7.19548	6.95925	11.4318	7.36795	3.98842	4.5661	3.7005	0.667731	0.575801	0.949528	0.536642	0.387488	35.2888	59.7486	5.26175	1.17431
BokchoyProtoplast01_ID170	BokchoyProtoplast01_cmb_ID155	U				2417.9	581.65 Win054_C03	156		FALSE	0	0		13.5704	32.2284	27.99	122.959	9.92621	1.78952	1.67441	2.41304	1.59231	2.69897	3.0128	1.24331	0.413554	1.8593	3.14599	67.3424	39.0399	109.569	18.0831	31.1636	4.14959	44.6062	4.00741	176.606
BokchoyProtoplast01_ID171	BokchoyProtoplast01_cmb_ID156	I		C00299	Uridine (4TMS)	2433.5	584.17 Win055_C01	157	Uridine (4TMS)	TRUE	58-96-8|10457-16-6	uridine		13.594	11.2905	33.3485	16.8364	9.70947	7.90913	6.52267	4.56443	3.48934	4.37348	11.9259	4.16678	4.24641	1.17521	5.55584	2.26555	3.95843	2.84485	3.15365	2.07436	12.7091	49.984	5.18475	8.68455
BokchoyProtoplast01_ID172	BokchoyProtoplast01_cmb_ID157	U				2439.1	585.1 Win055_C02	158		FALSE	0	0		7.64758	25.7047	5.88896	31.058	2.93648	0.290123	0.136659	0.165826	0.241967	0.754873	0.356282	0.0509999	0.0760977	0.8558	0.0954889	0.877585	0.589721	1.00726	0.397957	0.500817	0.348855	19.0998	1.39505	2.19176
BokchoyProtoplast01_ID173	BokchoyProtoplast01_cmb_ID158	U				2450.3	586.93 Win055_C03	159		FALSE	0	0		2.70393	5.32831	5.47703	23.7818	2.31241	1.01393	4.87229	1.40873	7.55419	6.56397	9.90485	9.25053	2.21092	11.9751	17.6609	104.245	144.433	150.926	522.034	99.5283	3.0954	21.6008	3.98624	74.4712
BokchoyProtoplast01_ID174	BokchoyProtoplast01_cmb_ID159	I		C00780	Tryptamine, 5-hydroxy- (4TMS)	2459	588.26 Win055_C04	160	Tryptamine, 5-hydroxy- (4TMS)	TRUE	50-67-9|153-98-0|55429-74-8	serotonin		0.000163094	0.000442882	0.00335054	0.000221518	0.000260966	0.000533558	0.000353749	9.84e-05	6.33e-05	6.68e-05	0.000188088	0	0.000102885	0	3.36e-06	0.000187413	0.000129507	0.00180461	1.31e-05	7.65e-05	0.00200039	0.00140028	6.75e-06	0.000216913
BokchoyProtoplast01_ID175	BokchoyProtoplast01_cmb_ID160	M1			M000000_A252002-101_MST_2518_EITTMS_	2484	592.34 Win056_C01	161		TRUE	0	0		22.3512	16.8671	43.6303	38.7593	53.8279	4.64263	3.8009	1.33689	1.90969	8.25362	4.0644	3.42269	2.22583	0.924206	4.29047	0.00252206	0.00394584	0.000363218	0.0780579	0.00291633	10.9828	14.2033	2.09522	0.00575805
BokchoyProtoplast01_ID177	BokchoyProtoplast01_cmb_ID162	U				2502.8	595.26 Win056_C03	163		FALSE	0	0		26.0119	40.4519	48.3124	97.9166	28.6719	4.93573	2.22437	5.48929	7.78821	3.59324	4.51461	2.25182	2.85767	4.07023	3.55565	2.87848	4.18503	7.60943	5.46939	2.6496	13.5752	31.9275	2.27263	3.16796
BokchoyProtoplast01_ID178	BokchoyProtoplast01_cmb_ID163	U				2516.9	597.49 Win056_C04	164		FALSE	0	0		0.0002134	0.00209646	0.000707903	0.000398747	7.56e-05	0.00128574	1.47e-05	5.27e-05	1.51e-06	0.00109447	0.00092726	4.73e-06	0.000116456	0.000212599	7.31e-05	3.54e-05	4.24e-05	0.000866685	1.26e-05	3.53e-05	8.51e-05	5.97e-05	2.35e-05	1.86e-05
BokchoyProtoplast01_ID179	BokchoyProtoplast01_cmb_ID164	U				2528.5	599.25 Win057_C01	165		FALSE	0	0		2.40044	1.95434	2.48091	1.8495	2.2102	0.350615	0.316444	0.33129	0.284066	0.750463	0.517859	0.200901	0.386099	0.262107	0.342291	0.000159461	0.000358103	0.0015191	0.00200289	0.000319288	1.31703	8.98403	0.625284	2.5e-05
BokchoyProtoplast01_ID180	BokchoyProtoplast01_cmb_ID165	M1			M000000_A258003-101_MST_2581.2_EITTMS_	2544.6	601.84 Win057_C02	166		TRUE	0	0		22.228	18.1249	23.1036	152.469	14.6164	3.49582	2.25727	2.62761	14.2981	1.84451	5.88612	2.69222	2.94116	8.97831	2.61531	13.9745	10.1704	14.6474	7.74091	6.62548	24.7981	36.54	4.86683	33.5427
BokchoyProtoplast01_ID182	BokchoyProtoplast01_cmb_ID167	M1			M000000_A259002-101_MST_2597.4_EITTMS_	2569.1	605.59 Win058_C02	168		TRUE	0	0		1.28471	1.36915	0.546787	0.962868	0.181399	0.215946	0.247905	0.190481	0.221234	0.126885	0.383044	0.174694	0.157065	0.178267	0.200689	18.3677	8.30192	16.4907	12.2869	7.84188	0.671655	1.59515	0.0846276	33.4941
BokchoyProtoplast01_ID183	BokchoyProtoplast01_cmb_ID168	U				2580	607.28 Win058_C03	169		FALSE	0	0		9.12e-05	2.79e-06	0.0003243	0.00843767	6.8e-07	9.85e-06	3.81e-06	1.39e-05	1.08e-05	6.42e-05	1.33e-05	4.18e-05	1.74e-05	0.00598266	4.03e-07	0.000201645	7.94e-05	0.000113822	3.03e-05	3.75e-05	0.000755781	5.29e-05	3.31e-09	9.56e-05
BokchoyProtoplast01_ID184	BokchoyProtoplast01_cmb_ID169	U				2592.9	609.31 Win058_C04	170		FALSE	0	0		0.000929215	0.228299	0.0823859	0.54541	0.158053	0.0139643	0.00058782	0.00259389	0.0497322	0.00577738	0.00658608	0.00233593	0.00252482	0.0496435	0.00136868	0	0.000974199	2.02e-05	0.0149969	0.00029448	0.0325507	0.0122041	0.00401624	0.000477512
BokchoyProtoplast01_ID185	BokchoyProtoplast01_cmb_ID170	I		C00089	Sucrose, D- (8TMS)	0	612.23 Win059_C01	171 X_241	Sucrose, D- (8TMS)	TRUE	57-50-1|19159-25-2	sucrose	COR_OK:HDA	43324.7	33563.6	27030.9	74561.4	21642.2	21281.3	14946.5	14202.7	18947.4	12521.3	5129.78	7517.12	4217.62	7526.43	11903.4	113382	37753.2	81641	54205.7	38096.1	27946.3	126010	6764.02	199463
BokchoyProtoplast01_ID187	BokchoyProtoplast01_cmb_ID172	I		C00208	Maltose, D- (1MEOX) (8TMS)	0	629.82 Win061_C01	173 X_172 X_175	Maltose, D- (1MEOX) (8TMS)	TRUE	4482-75-1|69-79-4|6363-53-7	d-maltose	COR_NG:HI	61.4285	16.1933	52.8661	87.2578	25.7955	21.6868	11.069	10.2098	19.7977	7.4782	32.7119	5.9129	12.1198	5.96734	5.2174	585.436	331.74	840.886	132.591	248.253	46.5179	152.769	15.3141	2049.51
BokchoyProtoplast01_ID188	BokchoyProtoplast01_cmb_ID173	I		C00689	Trehalose, alpha,alpha'-, D- (8TMS)	2724.7	630.55 Win061_C02	174	Trehalose, alpha,alpha'-, D- (8TMS)	TRUE	6138-23-4|99-20-7	d-trehalose		2.86637	3.74859	2.62551	2.42764	2.94774	0.754419	0.119491	0.1293	0.43105	0.384471	0.129405	0.0373769	0.0229566	0.0584287	0.0116064	25.7333	15.1227	33.33	5.78428	9.61301	1.3703	0.280732	0.0411845	94.0075
BokchoyProtoplast01_ID190	BokchoyProtoplast01_cmb_ID175	U				2773.6	638.85 Win063_C01	176		FALSE	0	0		79.3088	34.8463	72.8165	281.254	30.0621	8.90286	2.59574	4.59195	21.0491	4.63656	7.08392	2.60628	4.43913	11.4271	4.51171	0	0.00155798	1.43e-05	0.0279915	0.000794442	61.3696	133.009	7.37919	0.00817491
BokchoyProtoplast01_ID191	BokchoyProtoplast01_cmb_ID176	M1			M000000_A207003-101_MST_2072_EITTMS_	2780.7	640.08 Win063_C02	177		TRUE	0	0		0.00165156	3.71e-08	6.55e-06	1.19e-06	5.78e-05	7.91806	9.02869	2.14972	13.5683	5.96873	1.62307	4.66649	1.40119	2.05159	5.23673	0.201945	0.0608854	0.202453	0.0947539	0.0771204	5.71e-06	19.3185	3.0137	0.216644
BokchoyProtoplast01_ID193	BokchoyProtoplast01_cmb_ID178	U				2802.9	643.93 Win063_C04	179		FALSE	0	0		0.242331	0.0715508	2.27839	0.340345	1.39895	0.209944	0.417676	0.169237	0.303465	0.273301	0.437016	0.192783	0.471917	0.537831	0.83038	0.00168253	0.000143019	4.76e-05	0.000368255	0.000310575	0.296685	21.4901	1.1622	0.0311301
BokchoyProtoplast01_ID195	BokchoyProtoplast01_cmb_ID180	A2			Lactitol (9TMS)	0	650.61 Win065_C01	181 X_182	Lactitol (9TMS)	TRUE	585-86-4	1274:lactitol	COR_OK:PC1	3.92989	0	0.776263	1.46713	0.847869	8.76034	10.5893	8.11677	21.8946	4.87666	20.7354	10.5353	12.3505	19.5477	8.60865	56.4897	38.1298	42.2229	58.7524	31.3056	0.0198461	140.896	22.7806	115.881
BokchoyProtoplast01_ID197	BokchoyProtoplast01_cmb_ID182	M1			M000000_A207003-101_MST_2072_EITTMS_	2883.1	658.61 Win066_C02	183		TRUE	0	0		0.54831	0.829663	0.206158	4.25307	1.00636	0.490183	0.0899631	0.115877	0.506369	0.0476607	0.320091	0.0761865	0.057961	0.235679	0.186157	0.934026	0.123523	0.468737	0.519216	0.221908	0.29877	3.19355	0.129999	1.09536
BokchoyProtoplast01_ID198	BokchoyProtoplast01_cmb_ID183	A2			Maltitol (9TMS)	0	661.93 Win067_C01	184 X_178 X_180	Maltitol (9TMS)	TRUE	585-88-6|97906-38-2	maltitol	COR_OK:PC1	0.0169418	0.0317932	6.10902	8.85087	0.0481214	24.3229	21.7896	15.3018	32.2257	13.8009	42.0562	22.2796	16.7054	20.8005	21.1925	6.63335	4.42729	5.66414	3.59545	3.07176	0.0250733	188.572	26.0032	14.36
BokchoyProtoplast01_ID199	BokchoyProtoplast01_cmb_ID184	U				2917.2	665.18 Win068_C01	185		FALSE	0	0		27.7094	22.3547	23.0025	44.4008	13.7648	6.79299	4.26042	2.99494	3.90572	2.52009	3.28934	1.80329	1.78118	1.73506	2.61552	29.8311	18.0238	27.4053	12.7013	12.8644	15.9053	28.5533	2.26599	93.0202
BokchoyProtoplast01_ID200	BokchoyProtoplast01_cmb_ID185	U				2924.5	666.74 Win068_C02	186		FALSE	0	0		2.8e-06	3.47e-08	4.32e-07	8.79e-08	0.0499787	0	6.62e-05	7.24e-05	0	0.0255061	0.051621	7.6e-08	0.227964	0.00284799	0.0153191	0.518521	0.197031	3.15138	0.103037	0.874614	0.00832671	0.365521	0.143016	5.53382
BokchoyProtoplast01_ID201	BokchoyProtoplast01_cmb_ID186	U				2933.4	668.54 Win069_C01	187		FALSE	0	0		2.87136	2.83877	1.83941	3.14435	0.500637	1.88737	1.11261	0.839685	0.744203	0.271744	2.42089	0.650859	0.468968	0.349582	1.37329	0.00292906	0.00225689	0.00785818	0.00248945	0.00176224	0.940302	4.29338	0.562443	0.00359341
BokchoyProtoplast01_ID202	BokchoyProtoplast01_cmb_ID187	U				2939.7	669.76 Win069_C02	188		FALSE	0	0		4.43582	7.44053	0.0204004	0.852455	2.24188	1.66962	0.0708993	2.90207	0.385024	0.0460747	0.266476	0.367896	0.00420879	0.000970913	2.66596	62.6	38.207	110.771	76.7289	27.2413	7.22962	0.0226287	0.00345116	231.139
BokchoyProtoplast01_ID203	BokchoyProtoplast01_cmb_ID188	I		C01235	Galactinol (9TMS)	2972.6	676.5 Win070_C01	189	Galactinol (9TMS)	TRUE	16908-86-4|3687-64-7	galactinol		37.4673	34.1599	47.6776	106.284	38.4503	5.32735	2.82237	4.06253	6.10411	3.42888	7.08518	3.54176	4.63213	3.49383	4.17262	0.345115	1.05765	3.12947	0.213286	0.379256	38.9503	49.6779	5.35998	0.539757
BokchoyProtoplast01_ID204	BokchoyProtoplast01_cmb_ID189	U				2999.6	681.98 Win071_C01	190		FALSE	0	0		6.4e-07	0.0253567	4.14e-05	0.0204977	0.000764818	0.00171247	6.8e-05	0.000197463	0.000184687	0.00251775	0.000777335	9.77e-05	0.00027376	0.000325451	0.00107811	0.109633	0.0482119	0.0919957	0.111492	0.0327059	0.00597172	1.39e-05	8.59e-05	0.221711
BokchoyProtoplast01_ID205	BokchoyProtoplast01_cmb_ID190	U				3015.6	685.7 Win072_C01	191		FALSE	0	0		0.0120253	0.00493182	0.00253601	0.00256716	1.18e-05	0.000756687	1.89e-06	0.000282917	0.000138898	0.0018312	9.86e-05	0.0015811	0.000157372	0.000660295	0.000255534	0.00221961	4.63e-06	7.91e-06	0.0102405	0.000108518	3.27e-05	0.000102518	0.0063574	0.000638294
BokchoyProtoplast01_ID206	BokchoyProtoplast01_cmb_ID191	U				3026.9	688.32 Win072_C02	192		FALSE	0	0		0.461384	0.605171	0.77323	0.896583	0.362693	0.558235	0.205889	0.116893	0.152879	0.259286	0.589351	0.265288	0.128489	0.113606	0.24405	0.000103695	0.0131124	0.00187531	2.3e-06	0.000246514	0.370975	1.91339	0.269363	0.0286334
BokchoyProtoplast01_ID207	BokchoyProtoplast01_cmb_ID192	U				3033	689.68 Win072_C03	193		FALSE	0	0		0.000947332	0.013945	0.00233736	0.018584	0.00275701	0.000878702	0.0006167	0.00838972	0.000506293	2.53e-08	0.00174139	0.00131955	0.00112041	0.00157497	0.00120743	0.00100558	2.25e-05	0.00398871	0.0401052	0.000273889	0.000876592	0.0144022	0.00155925	2.38e-06
BokchoyProtoplast01_ID208	BokchoyProtoplast01_cmb_ID193	M1			M000000_A285001-101_MST_2851.8_EITTMS_	3045.5	692.64 Win073_C01	194		TRUE	0	0		66.9291	48.7768	95.092	67.6155	23.7324	9.06156	6.65398	5.65947	3.80651	2.15837	6.20723	5.56241	8.11684	2.69614	2.56211	0.0956967	0.146823	0.966097	0.194878	0.0955834	21.2577	41.4394	3.74468	0.0260129
BokchoyProtoplast01_ID209	BokchoyProtoplast01_cmb_ID194	U				3069.3	698.05 Win073_C02	195		FALSE	0	0		1.58e-05	2.6e-05	4.12e-07	5.34e-05	0.000180657	6.91e-06	6e-05	6.58e-07	5.25e-06	9.95e-07	1.88e-06	1.07e-07	1.28e-07	1.08e-05	1.19e-05	3.85e-05	7.96e-06	0.000110418	0.000442931	2.15e-05	3.62e-06	4.43e-05	3.65e-05	1.9e-06
BokchoyProtoplast01_ID210	BokchoyProtoplast01_cmb_ID195	M1			M000000_A311002-101_MST_3110.4_EITTMS_	3081	700.77 Win074_C01	196		TRUE	0	0		166.017	133.804	436.62	1579.78	569.583	105.963	38.3397	43.6275	76.7751	17.5589	83.3774	24.9896	24.0277	9.75774	18.8238	2.00167	0.951168	1.54432	7.02229	1.08634	356.48	213.419	28.061	1.67782
BokchoyProtoplast01_ID211	BokchoyProtoplast01_cmb_ID196	M1			M000000_A311002-101_MST_3110.4_EITTMS_	3085.7	701.9 Win074_C02	197		TRUE	0	0		13.5127	9.39944	33.5843	46.2708	41.558	6.80062	2.18795	1.60962	7.85267	1.75439	6.90415	1.36088	0.450556	3.50827	4.58641	1.71613	4.54981	2.33788	4.55943	2.07585	19.3522	38.0348	1.33244	5.50673
BokchoyProtoplast01_ID212	BokchoyProtoplast01_cmb_ID197	M2			PR_MST_Sugar (Disaccharide)_3092.2	3092.2	703.4 Win074_C03	198	PR_MST_Sugar (Disaccharide)_3092.2	TRUE	0	0		1.41819	1.31877	1.3894	0.240582	0.229351	0.0909373	0.0821154	0.193446	0.12633	0.070584	0.253832	0.0933881	0.398344	0.00714885	0.0942861	0.00179585	0.0668647	0.0828161	0.00346074	0.0082943	1.07285	0.937978	0.142429	0
BokchoyProtoplast01_ID213	BokchoyProtoplast01_cmb_ID198	U				3099.6	705.06 Win074_C04	199		FALSE	0	0		0.0283934	0.00488617	0.159672	0.0405265	0.0387377	0.00551251	0.00239076	0.00843984	0.00278108	0.000454237	0.00155549	0.00505183	4.55e-05	0.00175757	0.000737838	0.0363374	0.0720468	0.00764851	0.169094	0.0297085	0.014613	0.00614911	0.00513579	0.222102
BokchoyProtoplast01_ID214	BokchoyProtoplast01_cmb_ID199	U				3110.3	707.88 Win075_C01	200		FALSE	0	0		1.13e-06	0.00293237	0	1.01e-05	0.000396621	0.011484	0.00149964	0.00134058	4.8e-05	0.00296856	0.00106012	5.81e-05	0.00013193	0.000554408	4.28e-06	0	0.00027465	0.000454158	5.06e-05	0.000152845	0	0.000683262	0.00024607	0.00385709
BokchoyProtoplast01_ID215	BokchoyProtoplast01_cmb_ID200	U				3117.9	709.9 Win075_C02	201		FALSE	0	0		1.08e-06	0.000218911	0.000116548	0.00116314	0.000102794	6e-06	5.28e-07	9.8e-05	3.08e-05	8.93e-05	3.73e-06	2.56e-05	1.64e-05	1.22e-06	4e-09	0.000292314	0.00016048	0.000122575	4.14e-06	4.66e-05	5.13e-05	0.000342061	4.3e-06	0.00924942
BokchoyProtoplast01_ID216	BokchoyProtoplast01_cmb_ID201	U				3151	718.63 Win077_C01	202		FALSE	0	0		0.242338	0.100028	1.72038	3.24508	1.11904	0.455586	0.117358	0.158183	0.269948	0.0891202	0.806023	0.052309	0.0718066	0.0831645	0.15025	0.385188	0.142283	0.401469	0.644747	0.200787	0.635433	0.690117	0.104802	0.386834
BokchoyProtoplast01_ID217	BokchoyProtoplast01_cmb_ID202	U				3163.5	721.92 Win077_C02	203		FALSE	0	0		0.0378884	0.0565757	0.0745631	0.0324016	0.0198977	0.0119932	0.00298429	0.00545232	0.000794359	0.000411211	0.00657331	0.0037867	0.00680635	0.00223349	0.0016413	4.55e-05	0.000701137	0.000123443	6.5e-06	5.87e-05	0.0183196	0.071868	0.00268751	0.00239281
BokchoyProtoplast01_ID218	BokchoyProtoplast01_cmb_ID203	U				3171.5	723.98 Win077_C03	204		FALSE	0	0		13.0228	9.88638	14.8339	12.5835	6.87395	1.81494	0.966857	1.05873	0.668443	0.523544	1.36358	0.845146	1.32464	0.48506	0.71573	0.0110051	0.000447594	0.0438622	4e-05	0.000901082	7.26567	11.5602	0.803806	0.0183348
BokchoyProtoplast01_ID220	BokchoyProtoplast01_cmb_ID205	U				3190.5	728.96 Win078_C02	206		FALSE	0	0		6.57e-05	0.00884381	0.0393193	1.10943	0.563156	0.168933	0.0933462	0.0939722	0.0176919	0.174306	0.0870572	0.0670845	0.076538	0.0727919	0.0192454	2.38097	0.592245	2.40941	0.177579	0.435303	0.337153	0.980063	0.206614	5.92269
BokchoyProtoplast01_ID221	BokchoyProtoplast01_cmb_ID206	U				3228.2	740.11 Win080_C01	207		FALSE	0	0		7.67e-05	0.00127687	0.000194442	0.0014772	0.000191029	2.17e-05	1.27e-05	5.53e-05	1.61e-06	9.89e-05	1.31e-05	0.000134485	3.81e-06	4.29e-05	3.69e-06	0.000473954	7.66e-05	0.00258165	8.59e-05	0.000116223	0.000146993	0.00372654	1.1e-05	5.91e-05
BokchoyProtoplast01_ID222	BokchoyProtoplast01_cmb_ID207	U				3234.4	742.01 Win080_C02	208		FALSE	0	0		1.56e-05	3.09e-06	0.000425699	0.000104883	0.000497461	2.38e-07	4.76e-05	0.000505814	4.96e-07	0.00145003	4.62e-05	6.58e-08	2.71e-09	0.000435014	0.000475672	5.85e-05	0.000283471	0.000342282	0.000289291	0.000336722	0.00218637	0.00469417	8.09e-07	0.000114987
BokchoyProtoplast01_ID223	BokchoyProtoplast01_cmb_ID208	U				3261.3	750.24 Win082_C01	209		FALSE	0	0		0.000141679	0.00139532	0.00126141	7.35e-05	0.000824715	0.00119731	4.48e-05	3.1e-05	0.000405142	9.84e-05	5.99e-06	0.00125951	8.32e-06	2.4e-09	0.000183189	0.00131551	2.63e-05	0.000377392	0.000234016	8.59e-05	1.06e-05	1.24e-06	0.000117406	0.00256223
BokchoyProtoplast01_ID224	BokchoyProtoplast01_cmb_ID209	U				3293.4	760.03 Win085_C01	210		FALSE	0	0		0.00804272	0.0145385	0.0310146	0.185754	0.00448492	0.139194	0.0118478	0.0087292	0.00334132	8.59e-05	0.0955138	0.00152862	0.0105928	0.00314989	0.0401857	0.0135611	0.0126151	0.0171814	0.00257384	0.00614583	0.000198167	0.0458083	0.0243716	0.163574
BokchoyProtoplast01_ID225	BokchoyProtoplast01_cmb_ID210	U				3298.3	761.5 Win085_C02	211		FALSE	0	0		5.18597	4.88764	7.91664	10.628	2.71456	1.25642	0.958902	0.553164	0.903673	0.4151	1.32479	0.44797	0.501645	0.74002	0.518843	1.92484	1.06856	1.2705	0.819909	0.809498	7.04215	10.21	0.593571	7.20081
BokchoyProtoplast01_ID226	BokchoyProtoplast01_cmb_ID211	U				3306.7	764.35 Win086_C01	212		FALSE	0	0		4.95e-06	3.64e-05	3.53e-05	6.68e-05	1.08e-05	1.57e-05	2.3e-06	7.37e-06	1.14e-05	2.87e-05	4.56e-05	2.05e-06	1.75e-07	1.22e-08	0	4.9e-06	2.28e-05	3.8e-05	1.81e-05	1.09e-05	1.27e-06	4.77e-05	1.85e-05	1.65e-05
BokchoyProtoplast01_ID227	BokchoyProtoplast01_cmb_ID212	U				3319	768.83 Win087_C01	213		FALSE	0	0		0.0219968	0.0213834	0.0336259	0.0341718	0.0210323	0.0266476	0.0153279	0.0167404	0.01734	0.00853816	0.0333859	0.0392234	0.0349857	0.0207883	0.0214584	1.96611	0.243761	1.19892	0.202156	0.353204	0.0181725	0.228694	0.0266821	4.68464
BokchoyProtoplast01_ID228	BokchoyProtoplast01_cmb_ID213	U				3321.8	769.83 Win087_C02	214		FALSE	0	0		0.00092565	0.000306896	0.000368621	0.000176694	0.000694882	5.59e-05	0.000247789	0.000396231	0.000226275	0.000155424	0.00177168	0.000484536	2.14e-05	4.85e-05	4.59e-05	2.99e-05	0.00348683	0.000282801	5.88e-05	0.000162322	3.34e-05	0.000829528	0.000538409	0.00105396
BokchoyProtoplast01_ID229	BokchoyProtoplast01_cmb_ID214	U				3330.5	772.92 Win088_C01	215		FALSE	0	0		0.000859877	0.00106463	0.00217364	9.78e-05	0.000175087	5.22e-05	0.00106106	0.000596504	2.13e-05	0.000208618	2.06e-05	0.000801739	1.3e-06	3.06e-05	0.000361947	0.000518616	0.000249918	0.000206862	0.002837	0.000309594	0.00224896	0.000937559	0.000123901	0.000384608
BokchoyProtoplast01_ID230	BokchoyProtoplast01_cmb_ID215	I		C00492	Raffinose (11TMS)	3362.8	784.4 Win089_C01	216	Raffinose (11TMS)	TRUE	127230-13-1|17629-30-0|512-69-6	d-raffinose		0.207117	0.444511	0.0136431	2.75527	0.00525085	0.00578106	0.000833385	0.0248468	0.0833485	0.00505059	0.0311833	0.0336699	0.00644677	0.201513	0.019843	0.244415	0.201012	0.101015	0.532704	0.119418	0.015585	0.0301416	0.0104694	0.532823
BokchoyProtoplast01_ID231	BokchoyProtoplast01_cmb_ID216	U				3370.4	787.06 Win089_C02	217		FALSE	0	0		3.28e-05	1.66e-07	6.25e-05	1.76e-05	2.01e-06	4.9e-06	2.72e-07	5.65e-07	0	0	8.57e-08	0	2.63e-07	0	2.3e-06	0.000267917	1.03e-05	0.000133948	6.32e-05	4.01e-05	3.61e-06	0	3.68e-07	0.000104129
BokchoyProtoplast01_ID232	BokchoyProtoplast01_cmb_ID217	A2		C01753	Sitosterol, beta- (1TMS)	0	790.41 Win090_C01	218 X_219	Sitosterol, beta- (1TMS)	TRUE	5779-62-4|2625-46-9|83-46-5	sitosterol	COR_NG:HI	113.013	99.024	111.452	197.372	47.2099	40.3328	18.3194	14.4888	23.4007	10.9284	26.0091	10.5659	12.5602	9.44895	15.4193	38.6351	28.8016	31.4477	17.7149	18.2814	61.9787	148.907	15.0409	168.95
RDA_BokchoyProtoplast01_ID250	RDA_BokchoyProtoplast01_cmb_ID017	I		C00148	Proline	RI:1291-1300	Proline M/z:142 + 216 RI:1291-1300	236	Proline	TRUE	609-36-9|344-25-2|7364-47-8|147-85-3	l-proline		7566.42	5130.4	7629.69	7543.15	7585.76	1283.75	687.839	773.855	796.292	943.993	1159.07	538.271	617.356	419.73	1008.24	2599.08	3731.19	5024.44	2113.56	2073.5	4752.89	8112.37	691.669	7351.43
RDA_BokchoyProtoplast01_ID251	RDA_BokchoyProtoplast01_cmb_ID018	I		C00042	Succinate	RI:1301-1308	Succinate M/z:172 + 218 RI:1301-1308	237	Succinate	TRUE	110-15-6|56-14-4|40309-57-7	succinic acid		5.33575	3.66655	9.04038	6.97615	4.0784	1.04323	0.490735	0.814702	1.94126	0.537879	1.54695	0.554908	0.547761	0.984693	0.97051	0.326217	0.58191	0.535035	0.288705	0.292472	4.79582	12.634	0.661628	1.24249
RDA_BokchoyProtoplast01_ID252	RDA_BokchoyProtoplast01_cmb_ID019	I		C01879	Pyroglutamate	RI:1515-1527	Pyroglutamate M/z:156 + 258 RI:1515-1527	238	Pyroglutamate	TRUE	30274-77-2|213608-51-6|98-79-3|4042-36-8|16891-48-8	l-5-oxoproline		11838.5	9649.3	17646.3	10356.7	13737.1	2264.17	740.122	1503.92	733.116	1721.14	1600.18	741.842	990.26	556.611	1881.12	225.175	388.463	619.199	238.994	221.835	9243.66	13079.5	799.692	495.558
RDA_BokchoyProtoplast01_ID253	RDA_BokchoyProtoplast01_cmb_ID020	I		C00025	Glutamate	RI:1602-1609	Glutamate M/z:230 + 246 RI:1602-1609	239	Glutamate	TRUE	56-86-0|617-65-2|138-16-9|15985-07-6|6893-26-1	l-glutamic acid		336.546	211.508	332.752	352.82	148.252	2.12046	1.21789	2.83897	2.19945	2.46341	1.19173	1.57493	3.13662	1.70253	2.77214	0.620934	1.07391	1.64921	0.525078	0.561049	234.169	50.9794	2.47906	1.23079
RDA_BokchoyProtoplast01_ID254	RDA_BokchoyProtoplast01_cmb_ID021	I		C00031	Glucose1	0	Glucose1 M/z:229 + 319 RI:1874-1891	240 X_244	Glucose1	TRUE	50-99-7|53991-51-8|34152-44-8|19126-99-9|492-61-5|492-62-6	d-glucose	COR_OK:PC1	2144.12	1838.22	2081.67	4127.67	1843.27	339.712	174.12	171.542	251.168	179.809	225.819	90.8728	110.373	113.739	154.724	1499.67	1507.75	1772.5	1005.77	900.922	1455.48	1457.11	125.189	4855.44
RDA_BokchoyProtoplast01_ID256	RDA_BokchoyProtoplast01_cmb_ID023	I		C00134	Putrescine	RI:1736-1745	Putrescine M/z:361 + 376 RI:1736-1745	242	Putrescine	TRUE	39772-63-9|333-93-7|110-60-1	putrescine		0.19441	0.252008	0.179627	0.62186	0.130886	0.055623	0.0286405	0.0376182	0.0500737	0.0230663	0.112796	0.0428783	0.0527427	0.0493123	0.0468383	0.424653	0.488852	0.997181	0.435132	0.304973	0.245394	0.517648	0.0573709	0.61582
RDA_BokchoyProtoplast01_ID257	RDA_BokchoyProtoplast01_cmb_ID024	I			Hexadecanoate	RI:2036-2045	Hexadecanoate M/z:313 + 328 RI:2036-2045	243	Hexadecanoate	TRUE	55520-89-3|57-10-3	palmitic acid		6.37602	6.72152	5.28084	9.42835	7.96186	2.29502	0.969926	2.84109	2.14914	0.922387	1.87096	1.14586	0.552914	0.421701	4.32176	10.7303	8.87683	16.8012	13.6338	7.12649	7.53384	6.18242	0.511829	20.8479
RDA_BokchoyProtoplast01_ID261	RDA_BokchoyProtoplast01_cmb_ID028	I		C00085	Fructose-6-phosphate	RI:2277-2287	Fructose-6-phosphate M/z:315 + 459 RI:2277-2287	247	Fructose-6-phosphate	TRUE	643-13-0|55530-74-0|26177-86-6	d-fructose-6-phosphate		0.495686	0.181744	0.353115	0.453011	0.251789	0.0151726	0.0104985	0.0146793	0.0212003	0.0156721	0.0248238	0.0222598	0.0146588	0.0144348	0.0243194	0.00756283	0.0105525	0.0181985	0.00568093	0.00590591	0.275884	0.235055	0.0189097	0.015414
RDA_BokchoyProtoplast01_ID262	RDA_BokchoyProtoplast01_cmb_ID029	I		C00037	Glycine	RI:1299-1305	Glycine M/z:174 + 248 RI:1299-1305	248	Glycine	TRUE	56-40-6|5630-82-0|7364-42-3	glycine		498.244	445.972	333.711	191.024	492.069	60.5679	30.4588	34.1944	18.0943	54.6482	80.6106	17.1212	30.9905	12.535	41.0142	88.2352	233.926	156.428	38.9616	82.9061	124.691	223.118	27.2444	921.238

## Sheet: Primary metabolites
kegg_compound	compound_id	final.annotation	Leaf0h_Mean	Leaf3h_Mean	Leaf6h_Mean	Protoplast_Mean	ratio.Leaf3h_Leaf0h	ratio.Leaf6h_Leaf0h	ratio.Leaf6h_Leaf3h	ratio.Prot_Leaf0h	ratio.Prot_Leaf3h	ratio.Prot_Leaf6h	log2.Leaf3h_Leaf0h	log2.Leaf6h_Leaf0h	log2.Leaf6h_Leaf3h	log2.Protoplast_Leaf0h	log2.Protoplast_Leaf3h	log2.Protoplast_Leaf6h
C00597		3PGA	0.141156			1.57685				11.171						3.48169
C00417	KPC00385	Aconitic acid, cis- (3TMS)	0.696894	4.29605	3.57391	8.44314	6.16458	5.12834	0.831905	12.1154	1.96532	2.36244	2.624	2.35849	-0.265509	3.59877	0.974767	1.24028
C00041	KPC00666	Alanine, beta- (3TMS)	5629.11	1004.42	10733.9	9786.83	0.178432	1.90685	10.6867	1.73861	9.74381	0.911771	-2.48655	0.931191	3.41774	0.797934	3.28449	-0.133257
C00216		arabinose	5.82563			64.9512				11.1492						3.47887
C00062	KPC00670	Arginine, DL-, -NH3 (3TMS)	102.887	1.20289	32.3962	48.1054	0.0116914	0.314872	26.932	0.467556	39.9915	1.48491	-6.41841	-1.66716	4.75125	-1.09679	5.32162	0.570374
C00072		AsA	9.94235			7.61726				0.766142						-0.384316
C00152	KPC00674	Asparagine, DL- (3TMS)	4118.09	375.75	253.801	1753.03	0.0912439	0.0616309	0.675452	0.425691	4.66542	6.90711	-3.45413	-4.0202	-0.566075	-1.23212	2.22201	2.78808
C00049	KPC00676	Aspartic acid, L- (3TMS)	18.4764	3.05102	1.41645	8.64125	0.165131	0.0766628	0.464255	0.467691	2.83225	6.10063	-2.59832	-3.70533	-1.10701	-1.09637	1.50195	2.60896
C00334	KPC00193	Butyric acid, 4-amino- (3TMS)	37659.5	5252.74	21999.9	26611.8	0.13948	0.58418	4.18828	0.706642	5.06628	1.20963	-2.84187	-0.775516	2.06636	-0.500948	2.34093	0.274568
C01197	KPC00359	Caffeic acid, trans- (3TMS)	84.4818	24.1391	61.7727	115.805	0.285731	0.731195	2.55903	1.37076	4.79739	1.87469	-1.80727	-0.451672	1.3556	0.454979	2.26225	0.906651
C00158	KPC00389	Citric acid (4TMS)	694.029	37.0886	40.2866	538.121	0.0534395	0.0580474	1.08623	0.775358	14.5091	13.3573	-4.22595	-4.10663	0.119323	-0.367065	3.85888	3.73956
C05422		DAsA	1.29617			0.558412				0.430816						-1.21486
C06547		ethylene	2.73565			25.2052				9.2136						3.20377
C00095		fructose	8.26785			337.204				40.785						5.34997
C00085	KPC00531	Fructose-6-phosphate	0.291753	0.018189	0.0149545	0.0928083	0.0623438	0.0512573	0.822173	0.318106	5.10245	6.20606	-4.00361	-4.2861	-0.282487	-1.65242	2.35119	2.63368
C00122	KPC00532	Fumaric acid (2TMS)	371.278	46.7357	29.4194	265.398	0.125878	0.079238	0.629483	0.714823	5.6787	9.02121	-2.9899	-3.65766	-0.66776	-0.484343	2.50556	3.17332
C01235	KPC01364	Galactinol (9TMS)	44.8944	4.50747	2.80514	15.8534	0.100402	0.062483	0.62233	0.353127	3.51714	5.65156	-3.31614	-4.00039	-0.684248	-1.50174	1.8144	2.49865
C00124		galactose	9.21131			207.278				22.5025						4.49201
C00333		galacturonate	0.142275			7.35541				51.6984						5.69205
C00092	KPC00562	Glucose-6-phosphate (1MEOX) (6TMS)	60.9367	7.49882	4.31556	22.9293	0.123059	0.0708204	0.575499	0.37628	3.05772	5.31316	-3.02258	-3.81969	-0.797115	-1.41012	1.61245	2.40957
C00031	KPC01444	Glucose1	2062.44	182.222	859.794	1633.32	0.0883524	0.416882	4.71839	0.791934	8.96336	1.89966	-3.50059	-1.26229	2.2383	-0.336547	3.16404	0.925743
C00025	KPC00693	Glutamate	230.667	1.9144	1.82589	48.3241	0.00829942	0.00791571	0.953766	0.209498	25.2424	26.4661	-6.91277	-6.98107	-0.0682921	-2.25499	4.65778	4.72607
C00064	KPC00697	Glutamine, L- (3TMS)	54577	5656.23	5103.86	21083.6	0.103638	0.0935167	0.902343	0.38631	3.7275	4.13092	-3.27038	-3.41863	-0.148252	-1.37217	1.89821	2.04646
C00026	KPC00130	Glutaric acid, 2-oxo- (1MEOX) (2TMS)	6.67369	0.441723	0.330152	3.40287	0.0661887	0.0494707	0.747419	0.509894	7.70364	10.307	-3.91727	-4.33728	-0.420012	-0.97173	2.94554	3.36555
C00258	KPC00571	Glyceric acid, DL- (3TMS)	813.248	53.9599	120.758	359.406	0.066351	0.148488	2.23792	0.441939	6.66062	2.97625	-3.91374	-2.75158	1.16216	-1.17808	2.73566	1.5735
C00116	KPC00572	Glycerol (3TMS)	7577.91	1129.03	2538.31	5671.34	0.14899	0.334961	2.24822	0.748404	5.02319	2.2343	-2.74672	-1.57793	1.16878	-0.418111	2.3286	1.15982
C00037	KPC00575	Glycine	336.931	39.1879	93.8548	236.36	0.116308	0.278558	2.39499	0.701508	6.03145	2.51836	-3.10397	-1.84395	1.26002	-0.511469	2.5925	1.33248
C00160	KPC00580	Glycolic acid (2TMS)	8.82343	1.03674	0.636308	7.06269	0.117498	0.0721157	0.61376	0.800447	6.81242	11.0995	-3.08929	-3.79354	-0.704254	-0.321122	2.76817	3.47242
C00051		GSH	271.122			304.24				1.12215						0.166267
C00127		GSSG	133.458			418.387				3.13498						1.64845
C00135	KPC00702	Histidine, L- (3TMS)	172.519	21.3795	25.8062	68.6984	0.123926	0.149585	1.20705	0.398209	3.21328	2.66209	-3.01245	-2.74096	0.271487	-1.3284	1.68405	1.41256
C00263	KPC00601	Homoserine, DL- (3TMS)	18.2838	0.665793	1.45495	3.18789	0.0364144	0.0795757	2.18528	0.174356	4.78811	2.19107	-4.77935	-3.65153	1.12782	-2.51989	2.25946	1.13164
C01177	KPC00076	Inositol-1-phosphate, myo- (7TMS)	51.3038	7.44605	2.40801	17.0663	0.145136	0.0469364	0.323395	0.332651	2.29199	7.08728	-2.78452	-4.41315	-1.62863	-1.58792	1.1966	2.82523
C00137	KPC00782	Inositol, myo- (6TMS)	0.236701	7165.06	6562.5	0.216035	0.122907	0.112571	0.915903	0.912694	2.63448	2.87638	-3.02436	-3.1511	-0.126733	-0.131797	1.39752	1.52425
C00311	KPC00634	Isocitric acid, DL- (4TMS)	73.4412	4.29471	9.48839	79.1364	0.0584783	0.129197	2.20932	1.07755	18.4265	8.34034	-4.09596	-2.95235	1.1436	0.107751	4.20371	3.06011
C00407	KPC00712	Isoleucine (2TMS)	1130.51	202.4	3455.26	3293.14	0.179035	3.05639	17.0715	2.91298	16.2705	0.95308	-2.48169	1.61183	4.09352	1.5425	4.02419	-0.0693306
C00490	KPC01445	Itaconic acid (2TMS)	0.645312	0.074798	0.229754	0.401299	0.11591	0.356036	3.07167	0.621869	5.36511	1.74664	-3.10892	-1.4899	1.61902	-0.685318	2.42361	0.804586
C00186		lactate	1.56874			1.07086				0.682625						-0.550835
C00123	KPC00715	Leucine, DL- (2TMS)	351.933	267.557	4149.59	4371.61	0.76025	11.7909	15.5092	12.4217	16.339	1.05351	-0.395454	3.5596	3.95505	3.6348	4.03025	0.0751985
C00047	KPC00717	Lysine (4TMS)	560.663	53.0833	649.827	981.645	0.0946794	1.15903	12.2417	1.75086	18.4926	1.51062	-3.40081	0.212921	3.61373	0.808067	4.20887	0.595145
C00149		malate	23.1273			26.5166				1.14655						0.197302
C00383		malonate	2.58657			3.04717				1.17807						0.236427
C00208	KPC00754	Maltose, D- (1MEOX) (8TMS)	44.2047	14.5299	296.895	440.827	0.328697	6.71636	20.4333	9.9724	30.3392	1.48479	-1.60517	2.74768	4.35285	3.31794	4.92311	0.570261
C00159	KPC00758	Mannose, D- (1MEOX) (5TMS)	419.684	4.19703	21.6533	61.1606	0.0100005	0.0515943	5.1592	0.14573	14.5723	2.82454	-6.64379	-4.27664	2.36715	-2.77863	3.86516	1.49801
C00073	KPC00719	Methionine, DL- (2TMS)	643.453	61.5028	334.947	342.515	0.0955824	0.520546	5.44605	0.532308	5.5691	1.02259	-3.38711	-0.941901	2.44521	-0.909668	2.47744	0.0322334
C00014		NH3	1.24532			8.55773				6.87191						2.78071
C00036		OAA	0.471137			0.372731				0.79113						-0.338013
C01595	KPC01440	Octadecatrienoic acid, 9,12,15-(Z,Z,Z)-, n- (1TMS)	673.519	319.989	819.747	1045.95	0.4751	1.21711	2.5618	1.55296	3.2687	1.27594	-1.0737	0.28346	1.35716	0.635019	1.70872	0.351559
C00077	KPC00727	Ornithine, DL- (4TMS)	259.92	7.90426	23.8465	40.27	0.0304103	0.0917452	3.01691	0.154932	5.09471	1.68872	-5.0393	-3.44622	1.59307	-2.69029	2.349	0.755929
C00209	KPC00852	Oxalic acid (2TMS)	419.556	54.8197	172.416	254.787	0.130661	0.410949	3.14515	0.607277	4.64772	1.47774	-2.9361	-1.28297	1.65313	-0.719574	2.21652	0.563394
C00079	KPC00729	Phenylalanine, DL- (2TMS)	339.069	130.507	339.226	573.083	0.384899	1.00046	2.59928	1.69016	4.39119	1.68938	-1.37745	0.000666467	1.37811	0.757164	2.13461	0.756497
C01389	KPC00898	Phytol (1TMS)	33.7432	4.43535	138.945	202.12	0.131444	4.11771	31.3266	5.98996	45.5703	1.45468	-2.92747	2.04184	4.96932	2.58255	5.51002	0.540704
C00148	KPC00732	Proline	6123.2	816.554	2233.34	4182.57	0.133354	0.364734	2.73508	0.68307	5.12222	1.87279	-2.90666	-1.45508	1.45158	-0.549895	2.35677	0.905186
C00134	KPC00924	Putrescine	35.5995	0.0491788	0.343263	91.9557	0.20571	1.43583	6.9799	2.58306	7.37559	1.05669	-2.28132	0.521889	2.80321	1.36908	2.88276	0.0795527
C00022		pyruvate	0.69532			0.441781				0.635363						-0.654347
C00492	KPC01369	Raffinose (11TMS)	0.571928	0.0298221	0.129041	0.206857	0.052143	0.225624	4.32702	0.361683	6.93636	1.60303	-4.26138	-2.14801	2.11337	-1.4672	2.79418	0.680805
C00805		salicylate	3.36356			8.66446				2.57598						1.36512
C00065	KPC00734	Serine, DL- (3TMS)	78892.6	10601.2	20058.2	32117.3	0.134375	0.254247	1.89207	0.407102	3.02959	1.6012	-2.89566	-1.9757	0.919965	-1.29654	1.59912	0.679156
C00493	KPC00972	Shikimic acid (4TMS)	66.1966	1.43598	5.97561	14.5733	0.0216926	0.0902707	4.16136	0.220151	10.1487	2.43879	-5.52665	-3.4696	2.05706	-2.18343	3.34322	1.28616
C00482	KPC00975	Sinapic acid, cis- (2TMS)	32.9169	6.9146	5.07124	23.9456	0.210062	0.154062	0.733411	0.727455	3.46305	4.72184	-2.25111	-2.69842	-0.447306	-0.459069	1.79204	2.23935
C01753	KPC01237	Sitosterol, beta- (1TMS)	101.401	17.2854	22.7188	71.8123	0.170466	0.22405	1.31434	0.708204	4.15451	3.16092	-2.55244	-2.15811	0.394335	-0.497763	2.05468	1.66034
C00315	KPC00985	Spermidine (5TMS)	126.648	0.862984	44.2836	148.327	0.0661053	3.39216	51.3146	1.17118	42.8636	0.835311	-3.91909	1.76221	5.6813	0.22796	5.42168	-0.259615
C00750		spermine	31.6068			18.4856				0.584862						-0.773831
C00042	KPC00993	Succinate	5.02341	0.981073	0.657688	3.31918	0.1953	0.130925	0.670376	0.660743	3.38322	5.04675	-2.35623	-2.93319	-0.576958	-0.597839	1.7584	2.33535
C00089	KPC00997	Sucrose, D- (8TMS)	4.25769	12210.8	42737.2	58.5103	0.330909	1.15817	3.49996	13.7422	6.17603	1.7646	-1.59549	0.211846	1.80734	3.78055	2.62668	0.819343
C00188	KPC00736	Threonine, DL- (3TMS)	16340.5	2494.86	9277.63	11927.7	0.15268	0.567771	3.7187	0.729947	4.7809	1.28564	-2.71142	-0.81662	1.8948	-0.454135	2.25728	0.362485
C00689	KPC00303	Trehalose, alpha,alpha'-, D- (8TMS)	2.56171	0.205182	12.3798	18.5162	0.0800958	4.83264	60.3357	7.22805	90.2425	1.49567	-3.64213	2.27281	5.91494	2.85361	6.49574	0.580795
C00398	KPC01057	Tryptamine (3TMS)	93.4206	14.9122	52.5368	93.2355	0.159624	0.562368	3.52307	0.998019	6.25229	1.77467	-2.64725	-0.830413	1.81683	-0.00286085	2.64439	0.827552
C00078	KPC00738	Tryptophan, DL- (3TMS)	35.5511	22.0786	89.316	111.124	0.62104	2.51233	4.04536	3.12577	5.03312	1.24417	-0.687243	1.32903	2.01627	1.64421	2.33145	0.315186
C00082	KPC00740	Tyrosine, L- (3TMS)	84.7743	94.1184	629.56	993.223	1.11022	7.42631	6.68903	11.7161	10.5529	1.57765	0.150849	2.89265	2.7418	3.55042	3.39957	0.657773
C00299	KPC01086	Uridine (4TMS)	15.448	5.84043	3.34105	13.6317	0.37807	0.216277	0.572055	0.882427	2.33403	4.08007	-1.40327	-2.20905	-0.805774	-0.180452	1.22282	2.0286
C00183	KPC00743	Valine, DL- (2TMS)	1185.96	467.672	5937.2	5957.48	0.394339	5.00623	12.6952	5.02333	12.7386	1.00342	-1.34249	2.32372	3.66621	2.32864	3.67113	0.00491941

## Sheet: LC-MS data
kegg_compound	Metabolites	Leaf0h_1	Leaf0h_2	Leaf0h_3	Leaf0h_4	Leaf0h_5	Leaf0h_6	Leaf0h_1/Ribitol	Leaf0h_2/Ribitol	Leaf0h_3/Ribitol	Leaf0h_4/Ribitol	Leaf0h_5/Ribitol	Leaf0h_6/Ribitol	Leaf0h_1/Ribitol/Chl	Leaf0h_2/Ribitol/Chl	Leaf0h_3/Ribitol/Chl	Leaf0h_4/Ribitol/Chl	Leaf0h_5/Ribitol/Chl	Leaf0h_6/Ribitol/Chl	MeanLeaf0h/Ritol/Chl	SDLeaf1h/Ritol/Chl	Protoplast_1	Protoplast_2	Protoplast_3	Protoplast_4	Protoplast_5	Protoplast_6	Protoplast_1/Ritol	Protoplast_2/Ritol	Protoplast_3/Ritol	Protoplast_4/Ritol	Protoplast_5/Ritol	Protoplast_6/Ritol	Protoplast_1/Ribitol/Chl	Protoplast_2/Ribitol/Chl	Protoplast_3/Ribitol/Chl	Protoplast_4/Ribitol/Chl	Protoplast_5/Ribitol/Chl	Protoplast_6/Ribitol/Chl	Mean.Protoplast/Ribitol/Chl	SD.Protoplast/Ribitol/Chl	Leaf3h_1	Leaf3h_2	Leaf3h_3	Leaf3h_4	Leaf3h_5	Leaf3h_6	Leaf3h_1/Ribitol	Leaf3h_2/Ribitol
C00597	3PGA	0	0	9073	0	9544	0	0	0	0.0402136	0	0.0801963	0	0	0	0.301475	0	0.54546	0	0.141156	0.23189	43168	39922	38783	36312	37018	35736	0.104312	0.105572	0.127242	0.0954536	0.0811453	0.0820069	1.43687	1.79377	2.27014	1.61124	1.13489	1.21422	1.57685	0.418403
C00026	2OG	55697	117161	195000	111332	133850	19221	0.566406	1.05428	0.864285	0.590505	1.12471	0.314264	5.99691	9.57256	6.47941	5.60262	7.64982	1.52228	6.13727	2.67618	34796	64019	18556	13839	13605	43111	0.0840818	0.169296	0.0608799	0.0363787	0.0298228	0.0989311	1.1582	2.87649	1.08616	0.614064	0.417099	1.46481	1.26947	0.874385	102191	121429	78033	125132	146789	154554	3.51675	6.70693
C00158	citrate	31636	84259	76911	176995	8486	32889	0.32172	0.758209	0.340887	0.938781	0.0713061	0.537736	3.40626	6.88432	2.55558	8.90702	0.484993	2.60477	4.14049	3.13115	26368	74263	34255	90102	22767	64652	0.0637162	0.196386	0.112386	0.236852	0.0499064	0.148363	0.877672	3.33677	2.00509	3.99801	0.697985	2.19672	2.18537	1.30892	76427	96351	90892	165035	64467	155448	3.53709	5.32179
C00122	fumarate	2361	3787	7859	1224	3474	5866	0.02401	0.0340775	0.0348329	0.00649209	0.0291913	0.0959092	0.25421	0.309414	0.261137	0.0615961	0.198547	0.464581	0.258247	0.132251	17505	17394	13765	0	0	15048	0.0422995	0.0459977	0.0451612	0	0	0.0345321	0.582662	0.781544	0.805725	0	0	0.511295	0.446871	0.364077	26229	20649	23606	15490	49119	19021	0.432807	1.14051
C00333	galacturonate	0	0	3787	3823	6094	2363	0	0	0.0167849	0.0202772	0.0512066	0.0386351	0	0	0.125833	0.192387	0.348285	0.187147	0.142275	0.132453	308293	233096	232066	107787	164096	0	0.744966	0.616413	0.761379	0.283341	0.359707	0	10.2617	10.4734	13.5838	4.78272	5.03081	0	7.35541	4.96158	35678	18082	20551	10593	16430	14152	0.322017	0.99873
C00311	isocitrate	12273	147477	110267	250085	30145	3156	0.124809	1.32708	0.488729	1.32645	0.253302	0.0516007	1.32144	12.0495	3.66392	12.5852	1.72285	0.249952	5.26547	5.57543	52992	78075	37872	106980	26505	52490	0.128051	0.206466	0.124253	0.281219	0.0581003	0.120454	1.76386	3.50805	2.21681	4.74692	0.812584	1.78349	2.47195	1.41725	201723	221712	342241	370346	191255	480768	10.9395	12.2459
C00186	lactate	29092	12633	30710	32998	30235	10593	0.295849	0.113679	0.136114	0.175021	0.254059	0.173196	3.13234	1.03217	1.02042	1.66058	1.728	0.838954	1.56874	0.848505	26140	21263	26147	28609	20382	34579	0.0631653	0.0562292	0.085785	0.0752047	0.0446784	0.0793519	0.870082	0.955385	1.5305	1.26944	0.624866	1.17491	1.07086	0.32065	17142	39286	26594	22817	20641	24137	0.549217	2.1699
C00383	malonate	7005	43402	77864	81312	53906	18423	0.0712368	0.390555	0.345111	0.431279	0.452961	0.301216	0.75423	3.54613	2.58724	4.09191	3.08084	1.45908	2.58657	1.26963	130491	111569	58602	58020	19755	68169	0.315321	0.29504	0.192266	0.152518	0.0433039	0.156434	4.34346	5.013	3.43023	2.57446	0.605644	2.31622	3.04717	1.57546	74033	88285	77594	147535	98609	104253	2.37219	4.87628
C00036	OAA	0	18536	10137	10194	0	5840	0	0.166797	0.0449295	0.054069	0	0.0954841	0	1.51447	0.33683	0.512999	0	0.462521	0.471137	0.557198	9055	8742	7347	9653	10312	10821	0.0218807	0.0231179	0.0241046	0.0253749	0.0226044	0.024832	0.3014	0.392794	0.430052	0.428323	0.316143	0.367672	0.372731	0.0549447	9795	42489	0	22811	16400	29378	0.668472	2.34681
C00022	pyruvate	10023	6151	18765	10194	14978	7546	0.101928	0.0553501	0.0831708	0.054069	0.125857	0.123377	1.07918	0.502563	0.623519	0.512999	0.856025	0.597635	0.69532	0.227274	14607	7347	14436	9302	6606	11010	0.0352967	0.0194288	0.0473627	0.0244522	0.0144807	0.0252657	0.486201	0.330114	0.845002	0.412748	0.202525	0.374094	0.441781	0.218951	29391	28703	19193	20586	18737	22780	0.51834	1.58536
C00042	succinate	42029	73921	163390	30411	126201	155566	0.427411	0.665182	0.724182	0.1613	1.06044	2.54351	4.52527	6.03966	5.42908	1.53039	7.21266	12.3207	6.17629	3.56972	186876	330805	328163	126543	165554	259066	0.451571	0.874801	1.07666	0.332645	0.362903	0.594504	6.22026	14.8637	19.2088	5.61497	5.07551	8.80245	9.96428	5.7905	256731	362863	380409	358164	293264	372971	8.48664	20.0421
C00354	F16BP	21470	0	11689	9889	8058	19473	0.218338	0	0.0518084	0.0524512	0.0677097	0.318384	2.31168	0	0.388399	0.49765	0.460532	1.54224	0.86675	0.874693	0	0	0	0	0	0	0	0	0	0	0	0	0	0	0	0	0	0	0	0	10960	17057	8941	4100	6919	6151	0.139961	0.942115
C00197	G3P	35850	87401	94577	108211	66306	42456	0.364574	0.786482	0.419187	0.573951	0.557156	0.694157	3.85998	7.14104	3.14258	5.44556	3.78953	3.36247	4.45686	1.54331	0	0	0	0	0	0	0	0	0	0	0	0	0	0	0	0	0	0	0	0	77628	0	57273	38450	27856	38185	0.868868	0
C00149	malate	26624	537488	1371254	276919	508267	43363	0.270751	4.83661	6.07771	1.46878	4.27086	0.708986	2.86661	43.9151	45.5637	13.9356	29.0486	3.4343	23.1273	19.253	777721	961999	749223	416885	308606	534888	1.8793	2.54397	2.4581	1.09587	0.67648	1.22746	25.8868	43.2244	43.8553	18.498	9.46117	18.1742	26.5166	14.1771	4451736	4467460	4782746	4539288	3131583	3920246	89.2019	246.753
C00074	PEP	0	0	0	0	1424	0	0	0	0	0	0.0119656	0	0	0	0	0	0.0813847	0	0.0135641	0.0332252	0	0	0	0	0	0	0	0	0	0	0	0	0	0	0	0	0	0	0	0	0	0	0	0	0	997	0.0226859	0
C00805	salicylate	10633	51563	151426	44589	33842	70885	0.108131	0.463992	0.671155	0.2365	0.284367	1.15897	1.14486	4.21292	5.03154	2.24388	1.93414	5.61401	3.36356	1.83236	234403	102908	142733	173164	346656	379503	0.566417	0.272136	0.468289	0.455198	0.759887	0.870883	7.80222	4.62384	8.35478	7.68363	10.6277	12.8946	8.66446	2.82406	53087	23400	36026	13872	10938	40339	0.91788	1.29246
C00064	Gln	322	1290	3073	1554	1494	2508	0.00327455	0.0116081	0.0136202	0.00824241	0.0125538	0.0410059	0.0346698	0.105399	0.102109	0.0782028	0.0853853	0.198631	0.100733	0.0542497	166665	22587	10288	18997	34902	15707	0.402733	0.0597304	0.0337536	0.0499376	0.0765069	0.0360444	5.54752	1.01487	0.602201	0.842935	1.07002	0.533687	1.60187	1.94484							0	0
C00124	galactose	176759	116859	586885	27209	75426	19033	1.79754	1.05156	2.60121	0.144317	0.633789	0.31119	19.0317	9.54788	19.5009	1.36925	4.31076	1.50739	9.21131	8.33417	7691096	5474107	3529110	2414998	6390102	6829903	18.5849	14.4761	11.5786	6.34832	14.0074	15.6733	256.002	245.962	206.574	107.158	195.906	232.064	207.278	54.1083	0	0	913	0	0	0	0	0
C00216	arabinose	108362	68307	338627	3769	74224	25529	1.10198	0.614664	1.50087	0.0199908	0.623689	0.4174	11.6674	5.58097	11.2518	0.18967	4.24206	2.02187	5.82563	4.74066	2031657	1686013	1361426	692660	1888887	2295430	4.90934	4.45859	4.46666	1.8208	4.14053	5.26755	67.6247	75.7556	79.6902	30.7347	57.909	77.9933	64.9512	18.6096	3502	2206	315	0	0	0	0	0.121845
C00095	fructose	198470	108220	444139	7085	56060	13605	2.01833	0.973823	1.96853	0.0375788	0.471061	0.222442	21.3693	8.84204	14.7577	0.356543	3.20395	1.0775	8.26785	8.41463	11659133	9236693	6948527	3776694	9272320	10640807	28.1734	24.4261	22.7972	9.92783	20.3254	24.4185	388.08	415.021	406.727	167.579	284.268	361.549	337.204	95.5456	9946	770	0	0	0	2942	0.0669428	0.0425297
C00031	glucose	146625	103274	527987	25784	62371	14954	1.49109	0.929316	2.34016	0.136758	0.524091	0.244498	15.7872	8.43793	17.5438	1.29754	3.56464	1.18434	7.96924	7.25202	6513297	5160826	3688310	1959848	5979265	6650370	15.7389	13.6476	12.1009	5.15187	13.1068	15.2613	216.798	231.885	215.893	86.9624	183.311	225.964	193.469	54.8191	0	0	3905	718	0	0	0	0
C00089	sucrose	59632	127658	114924	2084	43495	28864	0.606423	1.14874	0.50937	0.0110535	0.36548	0.471927	6.42059	10.4302	3.81866	0.104874	2.48583	2.286	4.25769	3.66725	702011	2829535	789803	950782	1423538	2015965	1.69635	7.48259	2.59124	2.49933	3.12047	4.62623	23.3668	127.136	46.2306	42.1881	43.6425	68.4977	58.5103	36.5584	81609	73018	90849	41889	38189	332008	7.55456	4.03303
C01083	trehalose	0	0	0	77806	61528	63114	0	0	0	0.412683	0.517007	1.03192	0	0	0	3.91548	3.51646	4.99856	2.07175	2.32074	0	0	0	0	0	0	0	0	0	0	0	0	0	0	0	0	0	0	0	0	40411	29282	28702	0	0	53109	1.20845	1.61734
C00208	maltose	7669	8405	17612	9774	28034	56415	0.0779893	0.0756328	0.0780605	0.0518413	0.235564	0.922386	0.825723	0.686725	0.585207	0.491863	1.6022	4.468	1.44329	1.53424	167202	90243	144661	103813	122708	190054	0.404031	0.238644	0.474614	0.272894	0.268982	0.436136	5.5654	4.05478	8.46764	4.60639	3.76195	6.45759	5.48562	1.76833	33181	18906	0	19664	3032	27100	0.616638	1.04424
C00137	inositol	2171	2136	13983	959	3782	3572	0.0220778	0.0192209	0.0619759	0.00508653	0.0317794	0.0584023	0.233752	0.17452	0.464623	0.0482603	0.216149	0.282898	0.236701	0.137033	10506		3374	1523	6331	7985	0.0253869	0	0.0110697	0.00400352	0.0138779	0.018324	0.349697	0	0.197495	0.0675786	0.194094	0.271311	0.180029	0.128591	1051	0	0	0	0	0	0	0
	ribitol	98334	111129	225620	188537	119008	61162	1	1	1	1	1	1									413835	378149	304797	380415	456194	435768	1	1	1	1	1	1									43948	18105	15339	12782	5218	8721	0.198439	1
	Chlorophyll mg	0.0944497	0.110136	0.133389	0.105398	0.147025	0.206443															0.0725969	0.058855	0.0560504	0.0592425	0.0715007	0.0675385															105.11	130.856	127.326	115.577	138.24	182.778
[truncated: 18 more columns]

## Sheet: Target ions
The m/z of Q3 for each metabolite in MRM mode.
	Precursor ions	Product ions
3PGA	186.9	99
2OG	145.05	101.05
citrate	191.05	111.15
F6P	258.85	97.05
F16BP	338.9	96.9
fumarate	115	71.1
G3P	170.9	99
RuBP	310.8	99
G6P	258.8	97.15
isocitrate	191.05	111.15
lactate	89.1	43.5
malate	133.2	115.1
malonate	103.1	59.05
OAA	131.1	87.1
PEP	167	79.1
pyruvate	87.1	43.1
succinate	116.9	73.25
galactose	179.1	89.05
glucose	178.9	89
inositol	179.15	87.1
ribitol	151.05	88.9
arabinose	148.85	59
fructose	179.1	89.05
maltose	341.1	161.05
salicylate	137.05	93.15
sucrose	341.1	89.05
trehalose	341.2	179.15
ribitol	151.05	88.9

## Sheet: AsA.GSH
kegg_compound	Metabolites	CA1	CA2	CA3	CA4	CA1/gFW	CA2/gFW	CA3/gFW	CA4/gFW	CA1/Chl	CA2/Chl	CA3/Chl	CA4/Chl	MeanCA/Chl	PA1	PA2	PA3	PA4	PA1/Chl	PA2/Chl	PA3/Chl	PA4/Chl	MeanPA/Chl	P/C Mean	log2 P/C
C06547	ethylene	1346.3	1697.09	1275.21						2.55847	3.22511	2.42338		2.73565	13640.8	11647.1	14502		25.9227	22.1338	27.5592		25.2052	9.2136	3.20377
C00134	putrescine	9.02029e+06	2.31155e+07	4360960	2.4535e+06	66.8892	171.411	128.539	72.3166	21.6891	55.5808	41.6793	23.449	35.5995	0.17599	0.418483	0.585217	0.182009	41.1547	97.861	136.851	42.5623	91.9557	2.58306	1.36908
C00315	spermidine	2.79543e+07	3.49027e+07	21671298	23381972	239.891	299.518	492.041	530.882	77.7855	97.1199	159.546	172.141	126.648	0.752715	0.641194	0.508969	0.449987	176.02	149.941	119.021	105.228	148.327	1.17118	0.22796
C00750	spermine	8.73368e+06	6.42756e+06	7.61055e+06	8812643	66.2425	48.7512	127.393	147.515	21.4794	15.8078	41.3078	47.8324	31.6068	0.104153	0.0792136	0.0537835	0.0360714	24.3559	18.5239	12.5771	8.43519	18.4856	0.584862	-0.773831

## Sheet: NH4
kegg_compound	Metabolites	C1/Chl	C2/Chl	C3/Chl	C4/Chl	Mean C/Chl	P1/Chl	P2/Chl	P3/Chl	P4/Chl	Mean P/Chl	P/C	log2P/C
C00014	NH3	1.2053	1.2461	1.27118	1.2587	1.24532	8.66475	8.95764	8.27024	8.33829	8.55773	6.87191	2.78071

## Sheet: SA.SAG
kegg_compound	Metabolites	C1/Chl	C2/Chl	C3/Chl	C4/Chl	Mean C/Chl	P1/Chl	P2/Chl	P3/Chl	P4/Chl	Mean P/Chl	P/C	log2P/C
C00805	SA	0.901644	0.830981	0.866586	0.94754	0.157389	1.84089	1.9713	1.7878	1.81335	1.85334	11.7755	3.55772
	SAG	0.196437	0.16799	0.107738		0.157389	0.140626	0.0196195	0.184518	0.107586	0.113087	0.718521	-0.476897
